# Supplementary material for: Genetic Variation in Healthy Oldest-Old
Source: PLoS One. 2009 Aug 14;4(8):e6641. doi: 10.1371/journal.pone.0006641 (PMC2722017; doi:10.1371/journal.pone.0006641)
Supplement: Table S1 — Variants discovered by candidate gene sequencing (0.25 MB XLS) [file pone.0006641.s001.xls]

## Sheet: Supplemental Online Table S1
Supplemental online Table S1
Variants discovered by candidate gene sequencing
Variant number	Name of variant1	Chromosome	NCBI genomic location2	dbSNP reference (build 126)3	Flanking sequence4	Nucleotide difference	Amino acid difference	Minor allele frequency (%)
1	APOB_A1_CNS1/2_(-59419)_C/T	2	21179741		tctggccaat(C/T)ctaagaatca	(C/T)		1.06383
2	APOB_A1_CNS1/2_(-59366)_T/C	2	21179688		gatcctcttc(T/C)ttcttaatca	(T/C)		23.913
3	APOB_A2_CNS2_(-53,699)_T/C	2	21174021	rs2337383	agaagtcctt(T/C)tgggaattca	(T/C)		23.4043
4	APOB_A2_CNS2_(-53,664)_C/T	2	21173986	rs581998	gctacctcta(C/T)ggattagaga	(C/T)		36.1702
5	APOB_A2_CNS2/3_(-53433)_A/G	2	21173755	rs11693870	tgttgaggcc(A/G)ccccacctgc	(A/G)		24.4681
6	APOB_A4_CNS4_(-24125)_T/C	2	21144447		aaacttgata(T/C)ctgcactgag	(T/C)		1.06383
7	APOB_A5_CNS5_(-3252)_A/G	2	21123574		atttgcaatt(A/G)taatgctgtc	(A/G)		1.06383
8	APOB_A5_CNS5_(-3240)_T/C	2	21123562	rs588245	aatgctgtca(T/C)aggcagaaac	(T/C)		47.8261
9	APOB_A6_CNS6(Prom)_(-965)_A/G	2	21121287	rs512535	tgcctagaag(A/G)gaaggaaacg	(A/G)		48.9362
10	APOB_A7_CNS6(Prom)_(-644)_C/T	2	21120966	rs934197	ccttctctct(C/T)ctcccccagc	(C/T)		22.3404
11	APOB_A8_CNS6(Prom)_(-430)_C/A	2	21120752	rs9282606	gaagaaggca(C/A)ccctggtcag	(C/A)		1.06383
12	APOB_A8_CNS6(Prom)_(-393)_C/T	2	21120715	rs1800481	cctgaggcgc(C/T)ggccatggcc	(C/T)		24.4681
13	APOB_A8_CNS6(Prom)_(-277)_C/T	2	21120599	rs9282607	ccaggtgggc(C/T)ccctccccga	(C/T)		1.06383
14	APOB_A8_CNS6(Prom)_(-143)_G/A	2	21120465		aatggggtgc(G/A)ggcgccggcc	(G/A)		1.06383
15	APOB_A9_X1_(+23-31)_ 9bpdel_ctgctggcg	2	21120282	rs11279109	aggcccgcgc(tgctggcgc/*)tgctggcgct	del - tgctggcgc	Leu-Leu-Ala (AA pos 1-3)	26.5957
16	APOB_A11_IVS2(231)_G/A	2	21119669	rs12720799	cagcctgggg(G/A)cgggggaggg	(G/A)		1.06383
17	APOB_A12_IVS3_(+92)_G/T	2	21118646	rs661665	ttcccggagg(G/T)tgtgtactga	(G/T)		47.8723
18	APOB_A13_X4_(+293)_C/T	2	21117405	rs1367117	agccagtgca(C/T)cctgaaagag	(C/T)	Thn 98 Ile	24.4681
19	APOB_A22_X14_(+1853)_C/T	2	21104419	rs679899	gtgaaagaag(C/T)tctgaaagaa	(C/T)	Ala 618 Val	50
20	APOB_A23_X15_(+2188)_G/A	2	21103221	rs12691202	tcctgatggt(G/A)tctctaaggt	(G/A)	Val 730 Val	8.51064
21	APOB_A25_IVS17_(+15)_G/C	2	21099887		gattctgttt(G/C)ccttttgatt	(G/C)		3.19149
22	APOB_A26_X18_(+2706)_C/T	2	21099318	rs1801700	tccagatgaa(C/T)accaacttct	(C/T)	Asn 902 Asn	5.31915
23	APOB_A30_X22_(+3337)_G/C	2	21091918	rs12713844	ccatagttgt(G/C)acacaaagga	(G/C)	Asp 1113 His	1.06383
24	APOB_A34_X26_(+4659)_C/T	2	21088598		tgcaaagtgg(C/T)atcattaaaa	(C/T)	Gly 1553 Gly	1.06383
25	APOB_A37_X26_(+5753)_A/G	2	21087504	rs1801699	acaaatggca(A/G)tgggaaactc	(A/G)	Asn 1914 Ser	3.19149
26	APOB_A37_X26_(+5812)_A/G	2	21087477	rs533617	tggggagaac(A/G)tactgggcag	(A/G)	His 1923 Arg	4.25532
27	APOB_A41_X26_(+6936)_C/T	2	21086309	rs1041968	gaataaatga(C/T)Gttcttgagc*	(C/T)	Asp 2311 Asp	44.6809
28	APOB_A43_X26_(+7545)_C/T	2	21085700	rs693	tccgagagac(C/T)ctagaagata	(C/T)	Thr 2515 Thr	45.5556
29	APOB_A44_X26_(+7732)_G/C	2	21085513		actttgcaga(G/C)caatattcta	(G/C)	Glu 2566 Asp	1.06383
30	APOB_A45_X26_(+8135)_G/A	2	21085110		ccagacttcc(G/A)tttaccagaa	(G/A)	Arg 2716 His	1.06383
31	APOB_A45_X26_(+8148)_C/T	2	21085097	rs6413458	taccagaaat(C/T)gcaattccag	(C/T)	Ile 2717 Ile	1.06383
32	APOB_A46_X26_(+8216)_C/T	2	21085029	rs676210	cttcacatac(C/T)agaattccag	(C/T)	Pro 2739 Leu	18.0851
33	APOB_A46_X26_(+8353)_A/C	2	21084892	rs2163204	cacctcagca(A/C)acgaagcagg	(A/C)	Asn 2785 His	1.06383
34	APOB_A46_X26_(+8462)_C/T	2	21084783		aagattaatc(C/T)gctggctctg	(C/T)	Pro 2821 Leu	1.06383
35	APOB_A48_X26_(+9105)_T/C	2	21084140		ctttgaaaaa(T/C)tctcttttct	(T/C)	Asn 3035 Asn	1.06383
36	APOB_A49_X26_(+3136)_C/T	2	21083839		tcctgaaatg(C/T)gtctacctta	(C/T)	Arg 3136 Cys	1.06383
37	APOB_A51_X26_(+10294)_C/G	2	21082951		cacaaaagcc(C/G)aaattccaat	(C/G)	Gln 3432 Glu	2.12766
38	APOB_A53_X26_(+10740)_C/T	2	21082505		ttttcaccaa(C/T)ggagaacata	(C/T)	Asn 579) Asn	1.06383
39	APOB_A54_X26_(+10913)_G/A	2	21082332	rs1801701	aatgaagtcc(G/A)gattcattct	(G/A)	Arg 3638 Gln	3.19149
40	APOB_A58_IVS27_(+50)_G/C	2	21080888	rs1800479	aaaactcatt(G/C)tgattttctt	(G/C)		22.2222
41	APOB_A59_IVS28_CNS8_(-195)_T/C	2	21079998		gggcatgtga(T/C)aaagagaaat	(T/C)		1.08696
42	APOB_A59_IVS28_CNS8_(-46)_T/C	2	21079757	rs12691188	tattgtgtaa(T/C)tggagtaatt	(T/C)		2.17391
43	APOB_A60_X29_(+12541)_G/A	2	21079258	rs1042031	agttactcaa(G/A)aattccatat	(G/A)	Glu 4181 Lys	21.2766
44	APOB_A61_X29_(+12794)_T/C	2	21079005		ctaatagatg(T/C)aatctcgatg	(T/C)	Val 4265 Ala	2.12766
45	APOB_A61_X29_(+12809)_G/C	2	21078990	rs1801702	tcgatgtata(G/C)ggaactgttg	(G/C)	Ser 4274 Thr	2.12766
46	APOB_A62_X29_(+13013)_A/G	2	21078786	rs1042034	acaatcttca(A/G)tgattatatc	(A/G)	Asn 4338 Ser	18.0851
47	APOB_A63_X29_(+13441)_G/A	2	21078358	rs1801695	taaaagccag(G/A)ccattgcgac	(G/A)	Ala 4419 Thr	2.12766
48	APOB_A69_IVS29_CNS12_(+10274)_C/T	2	21067532		ctcctggtgg(C/T)gttgctaaga	(C/T)		4.25532
49	APOB_A70_IVS29_CNS12_(+10757)_G/A	2	21067049		atggaattac(G/A)gagggagggt	(G/A)		25.5319
50	APOB_A70_IVS29_CNS12_(+10769)_G/A	2	21067037	rs4665645	agggagggtc(G/A)gcgggggctg	(G/A)		1.06383
51	APOB_A71_IVS29_CNS13_(+16089)_T/C	2	21061717	rs7557067	ttttgctgct(T/C)ttcttggctt	(T/C)		24.4681
52	APOB_A73_IVS29_CNS15_(+25883)_G/A	2	21051923		taagggtctt(G/A)gaaatttttg	(G/A)		20.2128
53	APOB_A73_IVS29_CNS15_(+26174)_T/C	2	21051632	rs6733447	agtctttgca(T/C)gtttccaact	(T/C)		47.8723
54	APOB_A74_IVS29_CNS16_(+34939)_G/T	2	21042867		gttggccttg(G/T)gggctgggag	(G/T)		26.5957
55	APOB_A74_IVS29_CNS16_(+34947)_G/C	2	21042859		tgggggctgg(G/C)agcggtaagg	(G/C)		1.06383
56	APOB_A74_IVS29_CNS16_(+35231)_G/A	2	21042575	rs17397826	aatcaaaaac(G/A)caatcattct	(G/A)		20.2128
57	APOB_A74_IVS29_CNS16_(+35254)_A/G	2	21042552	rs17041662	cggttcctcc(A/G)gtgcttggag	(A/G)		47.8723
58	BECN1_CNS3_17097C_1185-239C/CG	17	38216711		tcactcacccctact[C/G]caggcttctcttctc	[C/G]		1.06383
59	BECN1_P2_3170_14294966075_1-1218dupTGTG	17	38230638		ttgtgtgtgtgtgtg[*/TGTG]gggggggggggtttg	dupl - TGTG		10.6383
60	BECN1_P2_3181_1-1206het_delG	17	38230627	rs34037822	tgtgggggggggggg[G/*]ttgagatggagtttc	del - G		1.08696
61	BECN1_P6_2283A_1-2104A/AC	17	38231525		aagcctgggcaacaa[A/C]gtgagaccccatctc	[A/C]		1.06383
62	BECN1_X1_2_3971_1-417dupG	17	38229837		cacgtccggtctcgg[*/G]cggaagttttccggc	ins - G		0
63	BECN1_X1_2_4188C_1-199C/CG	17	38229620		attggagtcccttcc[C/G]tgaccctgggctcta	[C/G]		1.06383
64	BECN1_X11_16626G_1184+17G/GA	17	38217182		tcagtatagcgcaat[G/A]ctgagtgaacttgta	[G/A]		1.06383
65	BECN1_X12B_17773T_1353+269T/TA	17	38216035	rs11552192	tgaaaaaaactaatt[T/A]aaatttgcttttctt	[T/A]		9.57447
66	BECN1_X4_8794A_260+78A/AG	17	38225014		ggaatcgagacctgg[A/G]gccaggtgatagaga	[A/G]		1.06383
67	BECN1_X9_13568C_831-23C/CA	17	38220240		ccctgtatttccccc[C/A]acctttctgccttcc	[C/A]		1.06383
68	CDKN2A_A10_3527G_316+174A/AG	9	21983964	rs2811711	ggttctcgcagtacc[A/G]ttgaacctggacctc	[A/G]		11.7021
69	CDKN2A_A13_1893G_1-1145G/GT	9	21985598		cctgtctcccagctg[G/T]aaaggaggaagggag	[G/T]		1.06383
70	CDKN2A_A3_29292G_471+29G/C	9	21958199	rs11515	gctctgagaaacctc[G/C]ggaaacttagatcat	[G/C]		17.0213
71	CDKN2A_A3_29332T_471+69C/CT	9	21958159	rs3088440	aaggtcctacagggc[C/T]acaactgcccccgcc	[C/T]		9.57447
72	CDKN2A_A5_26575G_442G/GA,A148A/T,dbSNP:3731249	9	21960916	rs3731249	gcccgcatagatgcc[G/A]cggaaggtccctcag	[G/A]	Ala 148 Thr	1.06383
73	CDKN2A_A7_22851G_187G/GC,G63G/R	9	21964640		ggagcaggggatggc[G/C]ggcgactctggagga	[G/C]	Gly 63 Arg	1.06383
74	CDKN2A_A8_22474G_1-191G/A	9	21965017		cgagcactcgctcac[G/A]gcgtccccttgcctg	[G/A]		38.2979
75	CDKN2A_A8_22631T_1-34G/GT,dbSNP:1800586	9	21964860	rs1800586	cggcggctgcggaga[G/T]ggggagagcaggcag	[G/T]		1.06383
76	CDKN2A_A9_22172A_1-493A/AT	9	21965319		ttcaatttggcagtt[A/T]ggaaggttgtatcgc	[A/T]		1.06383
77	CDKN2A_A9_22188G_1-477G/GA	9	21965303		ggaaggttgtatcgc[G/A]gaggaaggaaacggg	[G/A]		1.06383
78	CDKN2A_aP_21684G_317-4600G/GT	9	21965807		tctttggatcactgt[G/T]caactctgcttctag	[G/T]		2.12766
79	CDKN2A_aP_21930G_317-4354G/GA	9	21965561	rs3731238	gaaggggaggggaag[G/A]agagagcagtccgac	[G/A]		2.12766
80	CDKN2A_CNS_10644A_316+7291A/T	9	21976847	rs3731211	attgttaaatgtcca[A/T]catcggacactttga	[A/T]		28.7234
81	CDKN2A_X1_2899G_1-139G/GA	9	21984592		cgggcgcctccggca[G/A]cccttcccgcgtgcg	[G/A]		1.06383
82	CDKN2A_X1_3252C_215C/CG,T72T/R	9	21984239		acatcccgcggctca[C/G]gggggagtgggcagc	[C/G]	Thr 72 Arg	1.06383
83	CRYAB_A2_Prom(-650)_C/G	11	111288308		ccacatagaa(C/G)gaaagatgca	[C/G]		1.08696
84	CRYAB_A2_Prom(-652)_G/A	11	111288310	rs762550	agccacatag(A/G)acgaaagatg	[A/G]		36.9565
85	CRYAB_A3_Prom(-249)_C/G	11	111287907	rs14133	gaaacaagac(C/G)atgacaagtc	[C/G]		27.6596
86	CRYAB_A4_X1_(165)_G/A	11	111287494	rs2228387	cctccttcct(G/A)cgggcaccca	[G/A]	Leu 55 Leu	4.25532
87	CRYAB_A6_IVS1(-60)_G/T	11	111286474		gacagcacct(G/T)tgtaatcagt	[G/T]		1.06383
88	CRYAB_A6_IVS2(+214)_C/T	11	111286047	rs2070894	ttgatttgat(C/T)gccttagatg	[C/T]		27.6596
89	CRYAB_A6_IVS2(+4)_T/G	11	111286257	rs11603779	gcgccaggta(T/G)gtagcttgtt	[T/G]		27.6596
90	CRYAB_A7_X3_(460)_G/A	11	111284766		aacaggtctct(G/A)gccctgagcg	[G/A]	Gly 153 Ser	1.06383
91	DLL1_A1_CNS1(-8009)_G/C	6	170449160		aaggaaaggaaa(G/C)aaagagcttgg	[G/C]		1.06383
92	DLL1_A2_CNS2(-7575)_C/G	6	170448726	rs4710715	tccctatgcc(C/G)atgtgggcca	[C/G]		2.12766
93	DLL1_A2_CNS3(-7482)_C/A	6	170448634		ccagtgcagc(C/A)ggcaacaggt	[C/A]		13.8298
94	DLL1_A3_CNS4(-4758)_C/G	6	170445910	rs9348307	gaacaaggac(C/G)ctaattctt	[C/G]		13.8298
95	DLL1_A3_CNS4(-4746)_T/C	6	170445898		ctaattcttct(C/T)acgaataagaga	[C/T]		1.06383
96	DLL1_A4_CNS5(4236)_C/T	6	170445388		acaaaaaaca(C/T)caccaccagg	[C/T]		2.12766
97	DLL1_A6_CNS8(2321)_A/C	6	170443473	rs9459988	ggcactccaac(A/C)ctcacctggaac	[A/C]		1.06383
98	DLL1_A6_CNS8(-2102)_del10bp	6	170443254		cctttaaaaaa(TGAAAACAAA/*)agttctagtgtc	del - TGAAAACAAA		1.06383
99	DLL1_A6_CNS8(-2032)_T/G	6	170443184	rs2738820	taaaggttgt(T/G)ggttgggggc	[T/G]		37.234
100	DLL1_A7_CNS9(-1275)_G/C	6	170442427		caagccccc(G/C)ggacgctgtcg	[G/C]		1.08696
101	DLL1_A7_CNS9(-1182)_C/T	6	170442334		ccgcagcgc(C/T)gccccccgcgt	[C/T]		8.69565
102	DLL1_A7_Prom(-964)_A/G	6	170442116	rs2747755	gggggcgggg(A/G)ggagggttgca	[A/G]		1.08696
103	DLL1_A9_X1-5UTR(-158)_G/A	6	170441310	rs3823301	aggcggagacc(G/A)gcttttaaagaa	[G/A]		3.19149
104	DLL1_A10_IVS1(-128)_C/G	6	170440949	rs3734775	cgaccccagcg(C/G)cggccgtgcag	[C/G]		25.5319
105	DLL1_A13_CNS5(-22)_G/A	6	170439230	rs3818115	gggaaggcacc(G/A)ctggctcactc	[G/A]		3.19149
106	DLL1_A13_IVS4(+51)_A/G	6	170439201	rs2738822	gaacacggacc(A/G)cgcgcagggac	[A/G]		37.234
107	DLL1_A14_CNS10(-414)_A/G	6	170437725		tggaggacagac(A/G)atggagcagctg	[A/G]		1.06383
108	DLL1_A15_IVS4(-44)_G/C	6	170437355	rs17860710	ccctgttggga(G/C)gtacttggcgtg	[G/C]		4.25532
109	DLL1_A16_IVS5(-32)_G/A	6	170436744	rs2255020	agcaacagtca(G/A)cgtccatctga	[G/A]		4.25532
110	DLL1_A16_X7(+991)_G/A	6	170436308		ctggggattgac(G/A)agtgtgacccca	[G/A]	Glu 331 Lys	1.06383
111	DLL1_A17_X8(+1116)_C/T	6	170436065		cctgtgcgga(C/T)ggcccttgct	[C/T]	Asp 372 Asp	1.06383
112	DLL1_A18_X9(+1422)_G/A	6	170434870	rs3734776	ctggctacac(G/A)ggcaggaact	[G/A]	Thr 474 Thr	3.19149
113	DLL1_A19_IVS9(26)_G/C	6	170434218	rs2295205	gccgggcatcag(G/C)agggggtacctgg	[G/C]		27.6596
114	DLL1_A20_X10(-2133)_C/T	6	170434034		acgtcatatc(C/T)gaggagaagg	[C/T]	Ser 711 Ser	1.06383
115	DLL1_A20_X11(3UTR)(2211)_A/C	6	170433848	rs1033583	ttctcttaaa(A/C)taagtaaaat	[A/C]		29.7872
116	DLL1_A20_X11(3UTR)(2366)_C/T	6	170433693		cggccgcctg(C/T)ggcactgcct	[C/T]		3.19149
117	DLL1_A22_3UTR(+71)_C/T	6	170433155		ctgcggcccg(C/T)gaggctgagg	[C/T]		1.19048
118	DLL1_A22_IVS11(+148)_G/C	6	170433078	rs1569840	gaagcagccc(G/C)ttcctctcctcc	[G/C]		45.4545
119	DNMT2_A1_59232G_1176+2589G/GA	10	17228456		tgatttcgaagaggt[G/A]ggtagtcattgtagg	[G/A]		2.12766
120	DNMT2_A1_59208G_1176+2565G/A,dbSNP:7074891	10	17228480	rs7074891	acaaaatgagtcata[G/A]ttggaaaatgatttc	[G/A]		0
121	DNMT2_A1_59168G_1176+2525G/A,dbSNP:7075029	10	17228502	rs7075029	caaaactaattctaa[G/A]agatgaccaaatcaa	[G/A]		0
122	DNMT2_A1_59104G_1176+2461G/C,dbSNP:7075056	10	17228584	rs7075056	gcttgccagataatt[G/C]taaggtatttattac	[G/C]		7.44681
123	DNMT2_A1_59053G_1176+2410G/GA,dbSNP:11254400	10	17228635	rs11254400	gtaaaccgatttttc[G/A]ttctccttttcccat	[G/A]		20.2128
124	DNMT2_A1_59045G_1176+2402G/GA,dbSNP:7900163	10	17228643	rs7900163	accttacagtaaacc[G/A]atttttcgttctcct	[G/A]		47.8723
125	DNMT2_A1_59041A_1176+2398A/AG,dbSNP:10904887	10	17228647	rs10904887	ccataccttacagta[A/G]accgatttttcgttc	[A/G]		48.9362
126	DNMT2_A1_58864T_1176+2221T/TA,dbSNP:11254401	10	17228824	rs11254401	aattaatttggaaaa[T/A]gttattttatggaat	[T/A]		20.2128
127	DNMT2_A1_58781_1176+2137_1176+2138heT_insA	10	17228907		atgcagtaacaagca[*/A]taaaactcacatctt	ins - A		20.2128
128	DNMT2_A3_58470T_1176+1827T/TC	10	17229218		caatcacaaattatt[T/C]tggcacactttcatg	[T/C]		2.12766
129	DNMT2_A3_58092A_1176+1449A/AG	10	17229596	rs11254402	gagtacattatgcga[A/G]gtgaaataagccacc	[A/G]		20.2128
130	DNMT2_A5_57938C_1176+1295C/CG	10	17229750	rs11254403	attatttacagtagc[C/G]aaaaggtagaagcag	[C/G]		20.2128
131	DNMT2_A5_57910C_1176+1267C/T	10	17229778	rs4748359	atatttgtacaccag[C/T]gtttataacaccatt	[C/T]		0
132	DNMT2_A5_57781G_1176+1138G/GA	10	17229907	rs10904888	aatggttcagctgct[G/A]ttggaaaacgctatg	[G/A]		4.25532
133	DNMT2_A5_57501C_1176+858C/CA	10	17230187	rs10904889	tattgtagcaacata[C/A]actctcaatgaactt	[C/A]		20.2
134	DNMT2_X11.1_57121A_1176+478A/AG	10	17230567	rs11254405	atttcatctaaacaa[A/G]tgcatatgatatgta	[A/G]		20.2128
135	DNMT2_X11.1_57007_1176+364_1176+367het_delTTAA	10	17230681		gcataacatattttt[TTAA/*]tgttaattaaagaag	del - TTAA		20.2128
136	DNMT2_X11.1_56917A_1176+274A/AG	10	17230771	rs3736821	attctttttaaaaac[A/G]attttataaacaaat	[A/G]		20.2128
137	DNMT2_A7_52254C_1075+78C/CG	10	17235434	rs2273736	cttgtgtgtctagga[C/G]ttgcctaaacaaatg	[C/G]		48.9362
138	DNMT2_A7_52008C_946-39C/CT	10	17235680		tcttaaatctagttg[C/T]acattacttttttag	[C/T]		2.12766
139	DNMT2_A8_51012A_945+6A/AG	10	17236676	rs3736820	ggatgtgcaggtact[A/G]tgcatgttttaaagc	[A/G]		20.2128
140	DNMT2_CNS2_48545A_887+303A/G	10	17239143	rs2295811	agactattacttgct[A/G]attctttagcacttc	[A/G]		20.2128
141	DNMT2_CNS2_48507C_887+265C/CT	10	17239181		aggagcttaaatacc[C/T]gtagtggagacatgg	[C/T]		1.06383
142	DNMT2_CNS2_48263G_887+21G/C	10	17239425	rs2295810	ttttaaagatctatt[G/C]atcctgtatccaaaa	[G/C]		0
143	DNMT2_X8_47913C_558C/CT,F186F/F	10	17239775		ggtactgatggagtt[C/T]cccaaaattgaatct	[C/T]	Phe 186 Phe	1.06383
144	DNMT2_X8_47904T_549G/GT,L183L/L	10	17239784	rs11254408	gtaatgccaggtact[G/T]atggagttccccaaa	[G/T]	Leu 183 Leu	20.2128
145	DNMT2_X8_47852T_544-47T/TG	10	17239836	rs7894268	tgttaatttctctta[T/G]ttttaatgcaacttt	[T/G]		29.7872
146	DNMT2_X8_47811T_544-88T/A	10	17239877	rs2295809	taaaggctaatgagg[T/A]tgttttcgtaatgtt	[T/A]		48.913
147	DNMT2_A10_46435T_460-19T/TC	10	17241253	rs17140049	tttagagtaactaac[T/C]gctttgctttgctta	[T/C]		20.2128
148	DNMT2_A10_46416A_460-38A/AG	10	17241272		gtaccgctctcttta[A/G]ttttttagagtaact	[A/G]		1.06383
149	DNMT2_X6_45456G_459+78A/G	10	17242232	rs11254412	aaatttgattcgata[A/G]gcagaatggctttat	[A/G]		7.44681
150	DNMT2_X6_45150T_390-159T/TC	10	17242538	rs7907126	agtgagccgagattc[T/C]gccattgcattccag	[T/C]		50
151	DNMT2_X6_45126G_390-183G/GA	10	17242562		ttgaacctgggaggc[G/A]gaggatgcagtgagc	[G/A]		2.12766
152	DNMT2_A11_44397T_389+197T/TC	10	17243291		caagttttgttcaac[T/C]gattctcttctattt	[T/C]		2.17391
153	DNMT2_A11_44326C_389+126C/CA	10	17243362	rs3752950	atattaaatgtctta[C/A]tcatcagtattgatt	[C/A]		30.4348
154	DNMT2_A11_44078_324-56_3244294967244het_delACTTT	10	17243610	rs3833985	acaagtaatgatttt[ACTTT/*]tttactttttcttct	del - ACTTT		45.7447
155	DNMT2_A12_43543T_323+26C/CT	10	17244145	rs33993216	aggttcctgtacaag[C/T]ttacctttcatttga	[C/T]		30.8511
156	DNMT2_A12_43495C_301C/CT,H101H/Y	10	17244193	rs11254413	acgaatagcttctta[C/T]atattctagatattc	[C/T]	His 101 Tyr	46.8085
157	DNMT2_A12_43460G_266G/GA,G89G/D	10	17244228		ggattggccggcagg[G/A]tgatatgactgattc	[G/A]	Gly 89 Asp	2.12766
158	DNMT2_A12_43435T_252-11T/TA	10	17244253	rs10904892	gtttttttttttttt[T/A]acccctttaggattg	[T/A]		39.3617
159	DNMT2_A12_43434_252-12delT	10	17244254		tgttttttttttttt[T/*]tacccctttaggatt	del - T		42.5532
160	DNMT2_A12_43424T_252-22T/TG	10	17244264	rs11254414	tgtttttttttgttt[T/G]tttttttttttaccc	[T/G]		20.2128
161	DNMT2_A12_43420G_252-26G/GT	10	17244268		tctgtgttttttttt[G/T]ttttttttttttttt	[G/T]		1.06383
162	DNMT2_A13_36860T_251+18T/TG	10	17250828	rs17464824	atgtgtcataaatat[T/G]tcagtgttgtattgg	[T/G]		50
163	DNMT2_A13_36801T_210T/TC,F70F/F	10	17250887	rs7096233	tgacagattatcttt[T/C]gatatgattttaatg	[T/C]	Phe 70 Phe	20.6522
164	DNMT2_A14_31263A_174+131A/AG	10	17256425	rs2273735	gagttcaggagaagg[A/G]gattaacattttata	[A/G]		48.9362
165	DNMT2_A14_31126G_168G/GA,T56T/T	10	17256562	rs2273734	gttacttgccaagac[G/A]attgaagtgagtaat	[G/A]	Thr 56 Thr	48.9362
166	DNMT2_A14_30953G_65-70G/GA	10	17256735		ggattactaaattct[G/A]ctattttgatttctt	[G/A]		1.06383
167	DNMT2_A14_30879T_65-144T/TC	10	17256809	rs7090965	atgcctggcttcccc[T/C]ggcctgaccttccac	[T/C]		48.9362
168	DNMT2_CNS1_27736A_65-3287A/AC	10	17259952		tacatttgcatttac[A/C]tcttgtaaatattga	[A/C]		1.06383
169	DNMT2_CNS1_27379G_65-3644G/A	10	17260309	rs7084149	agttcagatccttat[G/A]ggtctgtacgttctt	[G/A]		0
170	DNMT2_CNS1_27232T_65-3791T/TC	10	17260456	rs11254428	gaacctcaaatggtg[T/C]gccctccttggcttc	[T/C]		20.2128
171	DNMT2_A15_4276G_64+164G/GC	10	17283412	rs1885395	ctcctgcgcgccgcc[G/C]tgtccacccctccag	[G/C]		31.4815
172	DNMT2_A15_4204_64+91_64+92het_insGGGGCGGACACTGT	10	17283484	rs36094500	agcggcgagacgcaa[*/GGGGCGGACACTGT]ggggcggacactgtg	ins - GGGGCGGACACTGT		27.6596
173	DNMT2_A15_4202A_64+90A/AT	10	17283486	rs1885394	ggagcggcgagacgc[A/T]aggggcggacactgt	[A/T]		25.5319
174	DNMT2_A15_4044G_1-5C/CG	10	17283644	rs11254458	gcggcggctgaggcg[C/G]ggggatggagcccct	[C/G]		2.12766
175	DNMT2_A15_3918G_1-131G/GC	10	17283770		cctctgaagccctga[G/C]cctggagcggtagga	[G/C]		3.19149
176	DNMT2_A15_3886T_1-163T/TC	10	17283802	rs2281647	ctagacccttgccaa[T/C]ccccaggccgcgagg	[T/C]		18.1818
177	DNMT2_P1.1_3634G_1-415A/AG	10	17284054	rs17381591	ggaaagaatgtttga[A/G]tgttcaggcttctaa	[A/G]		30.8511
178	DNMT2_P1.1_3558G_1-491G/GA	10	17284130	rs10795459	ggaatcttctctagg[G/A]gagaggctggtctaa	[G/A]		48.9362
179	DNMT2_P1.1_3429A_1-620A/AG	10	17284259	rs10795460	gtaggtgtaatttcc[A/G]agctaaaacataatt	[A/G]		48.9362
180	DNMT2_P1.1_3375C_1-674C/CA	10	17284313	rs17466418	atagcacttaaagac[C/A]cataaataatcctac	[C/A]		30.8511
181	DNMT2_P1.1_3208T_1-841T/TC	10	17284480		accaccttgggtaca[T/C]gttgtcaggaccctg	[T/C]		1.06383
182	DNMT2_P1.1_3193A_1-856A/AG	10	17284495		ccaagctgtagccca[A/G]ccaccttgggtacat	[A/G]		1.06383
183	DNMT2_P1.2_2809_1-1241_1-1240insAAGGGAAAGG	10	17284879		tacattctatagaga[*/AAGGGAAAGG]ctccctttccctttc	ins - AAGGGAAAGG		48.9362
184	DNMT2_P1.2_2808_1-1240_14294966060delCTCCCT	10	17284880		aatctacattctata[CTCCCT/*]agactccctttccct	del - CTCCCT		48.9362
185	DNMT2_P1.2_2784G_1-1265G/GA	10	17284904	rs11818636	acagccatctcttgt[G/A]gggaaaatctacatt	[G/A]		30.8511
186	DNMT2_P1.2_2767G_1-1282A/AG	10	17284921	rs11813029	ttttgaaatggccct[A/G]cacagccatctcttg	[A/G]		30.8511
187	DNMT2_A16_1349G_1-2700G/GA	10	17286339	rs973307	agaagtgaactgaag[G/A]gcatgtttggggaac	[G/A]		48.9362
188	DNMT2_A16_1327A_1-2722A/AC	10	17286361	rs3758415	agaagggaaagaaca[A/C]aagcagagaagtgaa	[A/C]		20.2128
189	DNMT2_A16_1097C_1-2952C/CT	10	17286591	rs3758414	tcacgagataagcct[C/T]agagaggaaataata	[C/T]		20.2128
190	DNMT2_A16_987T_1-3062T/TC	10	17286701		tggaagacatttgca[T/C]acataatcccagggg	[T/C]		2.12766
191	DNMT2_A18_983T_1-3066T/TC	10	17286705		tgattggaagacatt[T/C]gcatacataatccca	[T/C]		1.42857
192	DNMT2_A17_915_14294964160_1-3135dupGT	10	17286773		gctactccctattgt[*/GT]accacctccaccagc	dup - GT		19.1489
193	DNMT2_A18_740A_1-3309A/AG	10	17286948		atgtctagtttctct[A/G]attaaaatataaata	[A/G]		1.31579
194	DNMT2_A18_647C_1-3402C/T	10	17287041	rs10795463	ttttttttaaagaaa[C/T]gcattttctgctttt	[C/T]		19.1489
195	DNMT2_A18_639_1-3410delT	10	17287049		aatgtgttttttttt[T/*]aaagaaacgcatttt	del - T		22.3404
196	DNMT2_A18_630G_1-3419G/GT	10	17287058		gtgttaattaatgtg[G/T]tttttttttaaagaa	[G/T]		27.6596
197	DNMT2_A20_136T_1-3913T/TC	10	17287552	rs970750	aatgagctctgttgg[T/C]ctttccaattcaaat	[T/C]		20.2128
198	DNMT2_A20_109T_1-3940T/TC	10	17287579	rs1885393	caaataagtgggagc[T/C]cagaagtggtaaatg	[T/C]		30.8511
199	DNMT3A_CNS8_121104G_2739+5792G/GA	2	25304860		tttgtgggaaatcat[G/A]tattcatactgaaga	[G/A]		1.08696
200	DNMT3A_CNS8_120726_2739+5420_2739+5427het_delGAGAACAT	2	25305238		ggcctccaaccctgt[GAGAACAT/*]cctgagaacatgagc	del - GAGAACAT		1.06383
201	DNMT3A_CNS8_120709C_2739+5397C/CT	2	25305255		tcagccccagcctag[C/T]ggcctccaaccctgt	[C/T]		1.06383
202	DNMT3A_CNS8_120671G_2739+5359G/GA	2	25305293		tggctcagctccact[G/A]gggggtgaggagggc	[G/A]		23.913
203	DNMT3A_CNS7.2_117071T_2739+1759C/CT	2	25308893	rs752208	ggctggagggaggac[C/T]ggccgtctctctcct	[C/T]		19.1489
204	DNMT3A_A6_113914G_2597+30G/GA	2	25312050	rs2304429	ctggcatctggctgc[G/A]gtgtggctgttctga	[G/A]		36.1702
205	DNMT3A_A8_110684T_2408+223T/TC	2	25315280		cttaaagcaggacct[T/C]taaaagtactctctt	[T/C]		1.06383
206	DNMT3A_A9_108977T_2173+26C/T	2	25316987	rs2289195	tcctgtcccctccac[C/T]ttctcagctggtgct	[C/T]		42.5532
207	DNMT3A_A12_105572C_1852-37C/CA	2	25320392	rs2289093	gagcttgggacaccg[C/A]tgggcctgcatctga	[C/A]		22.3404
208	DNMT3A_A13_105152C_1667+101C/CT	2	25320812		cagaccctccacccc[C/T]tagccatgctccaga	[C/T]		3.19149
209	DNMT3A_A15_104593A_1554+255A/AT	2	25321371		tccccagatgtgggg[A/T]tgggagcagagcagc	[A/T]		1.06383
210	DNMT3A_A15_104221C_1475-38C/CT	2	25321743		gagggagaggccctt[C/T]ggtggtactcacccc	[C/T]		1.06383
211	DNMT3A_A17_103175G_1280-107G/GA	2	25322789		agagttgggaggtgg[G/A]aacaagttggagacc	[G/A]		1.08696
212	DNMT3A_A17_102958G_1266G/GA,L422L/L	2	25323006	rs2276598	tggccctaagggcct[G/A]gagccaccagaaggt	[G/A]	Leu 422 Leu	11.9565
213	DNMT3A_A18_102547G_1122+7G/GA	2	25323417	rs2276599	gtcctgcaggtgagt[G/A]tccctgctgggagct	[G/A]		22.3404
214	DNMT3A_A20_101290_640-49het_delG	2	25324674	rs3216707	gtgtcaggtggcctt[G/*]ctaattcctggagag	del - G		7.6087
215	DNMT3A_A21_99676G_640-1663G/GA	2	25326288	rs11681447	cttgaggatgggttt[G/A]cattcgcagctctag	[G/A]		22.8261
216	DNMT3A_CNS5_92185C_640-9154C/CT	2	25333779		cctcccttccagggg[C/T]tggtacttcacccca	[C/T]		3.19149
217	DNMT3A_CNS5_92184G_640-9155G/GT	2	25333780		gcctcccttccaggg[G/T]ctggtacttcacccc	[G/T]		3.19149
218	DNMT3A_A23_74775_639+124_639+125het_insG	2	25351189	rs34007008	tcttaatctctagtc[*/G]atgatgactggttca	ins - G		47.8723
219	DNMT3A_A24_73895G_449-153G/GC	2	25352069		ctgtgcctggcatgt[G/C]gtgggccatcatatt	[G/C]		9.57447
220	DNMT3A_A25_68256T_448+1106T/TG	2	25357708		cctctaacaatctta[T/G]tcaagagatatgatt	[T/G]		1.11111
221	DNMT3A_A27_67316C_448+166C/CT	2	25358648		tggatgcagcctgcg[C/T]atatgttttatttgg	[C/T]		1.06383
222	DNMT3A_A27_67315G_448+165G/GT	2	25358649		ctggatgcagcctgc[G/T]catatgttttatttg	[G/T]		1.06383
223	DNMT3A_CNS4_54402C_177+4950C/CT	2	25371562		cctctaaggatgttg[C/T]agggtgacaagtgtg	[C/T]		6.38298
224	DNMT3A_X4_49264G_73-84A/AG	2	25376700	rs7596387	tggggctggaaggga[A/G]gccagggccagcccc	[A/G]		12.766
225	DNMT3A_A31_35633C_27C/CT,P9P/P	2	25390331		gccctccagcggccc[C/T]ggggacaccagcagc	[C/T]	Pro 9 Pro	11.7021
226	DNMT3A_A32_7091C_1-28516C/CG	2	25418873		cacttgacaccggcc[C/G]ggggagaggaggggc	[C/G]		1.16279
227	DNMT3A_A32_7068G_1-28539G/GC	2	25418896		gctccgcgggctgcg[G/C]ggggaggcacttgac	[G/C]		1.16279
228	DNMT3A_P.1_6553T_1-29054T/C	2	25419411		agtgagatgagcaca[T/C]agtgagtggctgtgc	[T/C]		11.7021
229	DNMT3A_P2_6193G_1-29414G/GA	2	25419771		gctcccggtcccaga[G/A]aacttggcaactcgg	[G/A]		1.06383
230	DNMT3B_CNS2_5835T_1-24105T/TC	20	30807686		gacccgttttggggt[T/C]aaaaaaaggagaata	[T/C]		2.12766
231	DNMT3B_CNS2_5849G_1-24091T/TG	20	30807700	rs6058866	ttaaaaaaaggagaa[T/G]aggagtctgggtgtt	[T/G]		18.0851
232	DNMT3B_CNS2_6152C_1-23788G/GC	20	30808003	rs2424900	ctctgccagctgtag[G/C]ccccaggcaaaccac	[G/C]		43.617
233	DNMT3B_A1_11125C_1-18815C/CT	20	30812976	rs2424903	gaggggttaaggtag[C/T]atataccttgaaagg	[C/T]		43.617
234	DNMT3B_A4_11718C_1-18222T/TC	20	30813569	rs6087990	aggccccagaaggag[T/C]ctggttttggacgtc	[T/C]		42.5532
235	DNMT3B_X1_12048C_1-17892C/CT	20	30813899		gcttcctcgcagcag[C/T]tgctcccggctccgc	[C/T]		3.19149
236	DNMT3B_X1_12474C_1-17466C/CG	20	30814325	rs742630	acccggctgggtttg[C/G]ggggtgaggaaacgt	[C/G]		40.9091
237	DNMT3B_CNS4_14395A_1-15545A/AG	20	30816246	rs4911253	cctgctcttaaagtc[A/G]tagacataaccccca	[A/G]		46.8085
238	DNMT3B_CNS4_14737C_1-15203T/TC	20	30816588	rs2424905	aggtatgaggttgtg[T/C]gctcttcctcacaca	[T/C]		46.8085
239	DNMT3B_CNS5_25003A_1-4937G/GA	20	30826854	rs1883729	atcagcctggaggaa[G/A]tgagtgacatcagtt	[G/A]		42.5532
240	DNMT3B_CNS5_25007G_1-4933G/GA	20	30826858		gcctggaggaagtga[G/A]tgacatcagttctca	[G/A]		1.06383
241	DNMT3B_CNS5_25177C_1-4763C/CT	20	30827028		atgaggaaggcccct[C/T]ggggagaagcttgtg	[C/T]		5.31915
242	DNMT3B_CNS6_29261T_1-679T/TC	20	30831112		aactgcccccaggct[T/C]tctgcctgtgcctcc	[T/C]		1.06383
243	DNMT3B_CNS6_29589G_1-351G/GA	20	30831440		aggctggcggcagac[G/A]ggccgggacaggcag	[G/A]		1.06383
244	DNMT3B_A5_29731_1-209_14294967088het_delCA	20	30831582		cgggacagcctgtcc[CA/*]catggaaccaagtcc	del - CA		1.06383
245	DNMT3B_A5_29758C_1-182C/CT	20	30831609	rs6058885	tcctgagcctccaag[C/T]ttggtgagggggagg	[C/T]		5.31915
246	DNMT3B_A6_30198A_142+117G/GA	20	30832049	rs1569687	cacaattccccggga[G/A]ggaagagagctctag	[G/A]		1.06383
247	DNMT3B_A7_30767C_143-202T/TC	20	30832618	rs6058886	gtcctgtcacgtgcc[T/C]ggcccagggctctgt	[T/C]		5.43478
248	DNMT3B_A7_30770A_143-199C/CA	20	30832621	rs6141814	ctgtcacgtgcctgg[C/A]ccagggctctgttgt	[C/A]		38.0435
249	DNMT3B_A7_30800A_143-169C/CA	20	30832651	rs6119955	tcttaggaataaaat[C/A]agtggagaagatgaa	[C/A]		1.08696
250	DNMT3B_A7_30936C_143-33C/CG	20	30832787		actggtgcctgcccc[C/G]acaaaacagactcct	[C/G]		1.08696
251	DNMT3B_A7_30947_143-22het_delC	20	30832798	rs3835238	cccccacaaaacaga[C/*]tcctggctgtttcct	del - C		40.2174
252	DNMT3B_A7_30956G_143-13G/GA	20	30832807		aacagactcctggct[G/A]tttcctctacaggcc	[G/A]		1.08696
253	DNMT3B_A9_36069C_307-49C/CT	20	30837920	rs2424913	ggccccgccagaccc[C/T]aggcctccagtcacc	[C/T]		45.5556
254	DNMT3B_A9_36330A_432+87A/AG	20	30838181	rs2424914	ctggttgtggctggt[A/G]gataatctgtgtcct	[A/G]		46.6667
255	DNMT3B_A10_36801A_433-45G/GA	20	30838652	rs4911107	tggtctctggtcacc[G/A]acatcctttgctctg	[G/A]		41.4894
256	DNMT3B_A10_37121A_654+54A/AG	20	30838972	rs4911108	accctgaacacgggg[A/G]aaaaccagttacctg	[A/G]		39.3617
257	DNMT3B_A10_37196A_654+129A/AG	20	30839047	rs6057645	attgtaataattgac[A/G]tgtttgaattctaag	[A/G]		3.19149
258	DNMT3B_A11_38805C_813+177C/CT	20	30840656	rs6119285	cagattccactcaca[C/T]gggggacaaaagtgc	[C/T]		3.19149
259	DNMT3B_A11_38896G_813+268G/GT	20	30840747		ggggcagaatcatca[G/T]tgtggactctgaggg	[G/T]		2.12766
260	DNMT3B_A12_40961A_814-256A/AG	20	30842812		attgccttcattcag[A/G]gtatcctccttttcc	[A/G]		6.38298
261	DNMT3B_A12_40994A_814-223C/CA	20	30842845	rs2889703	agtggaagtgtcgta[C/A]ctaacaaggttctgg	[C/A]		44.6809
262	DNMT3B_A12_41029_814-188_8144294967109het_delCT	20	30842880		tctgtgtgttgagac[CT/*]ctgccatttctattt	del - CT		1.06383
263	DNMT3B_A12_41475C_921+151C/CT	20	30843326	rs910084	taacatgatggccac[C/T]ggattgggcctccca	[C/T]		38.0435
264	DNMT3B_A13_42119A_922-123G/GA	20	30843970	rs1474738	cagcccaggacagct[G/A]tctggctatgaaagg	[G/A]		38.2979
265	DNMT3B_X10_42880C_1067-272C/CT	20	30844731	rs3787143	tctgggaggctgagg[C/T]gagtggatcacttga	[C/T]		6.38298
266	DNMT3B_X10_42928A_1067-224A/AG	20	30844779		catggtgaaaaatag[A/G]aaaattagcctggtg	[A/G]		6.38298
267	DNMT3B_X10_43039A_1067-113G/GA	20	30844890	rs993419	cagtgcgccgagatc[G/A]caccactgcattcaa	[G/A]		43.617
268	DNMT3B_A14_45048G_1150G/GA,A384A/T	20	30846899		actcgaagacgcaca[G/A]ctgacgactcagcca	[G/A]	Ala 384 Thr	2.12766
269	DNMT3B_A14_45163G_1252+13T/TG	20	30847014	rs910085	gaggtgattgttggg[T/G]acctgggatcatggg	[T/G]		38.2979
270	DNMT3B_A14_45340C_1297+30C/CT	20	30847191	rs875041	ctcccagtcatcccc[C/T]tcacaccctggctag	[C/T]		39.3617
271	DNMT3B_A15_46611C_1377+126C/CT	20	30848462	rs6058890	tgccttgcactctgc[C/T]tctggggcaggatgg	[C/T]		2.12766
272	DNMT3B_A15_46690A_1378-113C/CA	20	30848541	rs6057648	ccttttaaaggacac[C/A]aagccaccagcagtg	[C/A]		2.12766
273	DNMT3B_A17_47989T_1491-87T/TC	20	30849840		gctttcaggaggggg[T/C]tggcatttccctgtg	[T/C]		3.19149
274	DNMT3B_A17_48157C_1572T/TC,C524C/C	20	30850008	rs6058891	ggagccctggagctg[T/C]tacatgtgtctcccg	[T/C]	Cys 524 Cys	45.7447
275	DNMT3B_A17_48259C_1674T/TC,Y558Y/Y	20	30850110	rs2424922	cacggggcttgaata[T/C]gtaagccacaggctc	[T/C]	Tyr 558 Tyr	39.3617
276	DNMT3B_A19_49659T_1760-110T/TC	20	30851510	rs660291	gctggattgaacgca[T/C]gtgatacagtcatga	[T/C]		4.25532
277	DNMT3B_A19_49764C_1760-5C/CG	20	30851615	rs1997797	tgtctctctggcccc[C/G]acaggctacctagtc	[C/G]		45.7447
278	DNMT3B_A19_49890C_1881C/CT,D627D/D	20	30851741	rs17123657	caaatacgtgaacga[C/T]gtgaggaacatcaca	[C/T]	Asp 627 Asp	1.06383
279	DNMT3B_A20_50167C_1905+253C/CT	20	30852018	rs2235759	gtaacctctgcctcc[C/T]gggtttaagcgattc	[C/T]		6.38298
280	DNMT3B_A20_50271C_1906-180C/CT	20	30852122	rs6058892	gtagagttggggttt[C/T]tccatgttggccaag	[C/T]		45.7447
281	DNMT3B_A20_50347A_1906-104A/AT	20	30852198		ccttcctgggattac[A/T]ggtgtgagccacctc	[A/T]		2.12766
282	DNMT3B_A20_50412T_1906-39T/TG	20	30852263		agctctctttccctc[T/G]gtccacaccctcatc	[T/G]		1.06383
283	DNMT3B_A20_50446C_1906-5T/TC	20	30852297	rs2424928	actctgtctctctct[T/C]tcagattgaagaatg	[T/C]		45.7447
284	DNMT3B_A21_50819C_1997-75C/CT	20	30852670	rs2065576	gccattgggaacctg[C/T]tggtctcagggaata	[C/T]		45.7447
285	DNMT3B_A22_51948A_2146-53A/AG	20	30853799	rs17368519	gcaaaggtctggttg[A/G]cactgaaactctaat	[A/G]		4.25532
286	DNMT3B_A24_55613C_2302-212T/C	20	30857464	rs4911263	caaaatgttcttgtc[T/C]ctccaactctgcttt	[T/C]		36.1702
287	DNMT3B_A25_57287A_2421-91G/GA	20	30859138	rs6119286	ggactgagggatggc[G/A]agggcagaaagagtg	[G/A]		2.12766
288	DNMT3B_A26_57962C_2562+443C/CT	20	30859813	rs6058896	gaaaactggctactg[C/T]tctgtgtttacagac	[C/T]		6.52174
289	DNMT3B_A27_58346A_2562+827A/G	20	30860197	rs2424932	aagtatggctcctcc[A/G]tatctccctcttccc	[A/G]		42.5532
290	DNMT3B_A27_58351T_2562+832T/TC	20	30860202		tggctcctccatatc[T/C]ccctcttccctagga	[T/C]		1.06383
291	DNMT3B_A29_58837_2562+1318het_delT	20	30860688		cattaaaattttttt[T/*]gtaactggagccacg	del - T		41.4894
292	DNMT3B_A29_58924C_2562+1405C/CT	20	30860775		taggctgaaagatga[C/T]ggatgcctagagttt	[C/T]		1.06383
293	DNMT3B_A30_59079_2562+1560_2562+1563het_delTCAT	20	30860930	rs3092509	agtaggtgattcatt[TCAT/*]attcatgtattcaaa	del - TCAT		50
294	FRAP1_A1_160026G_7650+1001C/CG	1	11089128	rs17235668	agttcaaaaaggaag[C/G]atttactctcttcag	[C/G]		1.06383
295	FRAP1_A1_159854G_7650+829A/AG	1	11089300	rs2536	tctggtacatattgg[A/G]aattatgagcagaac	[A/G]		2.12766
296	FRAP1_A2_159421T_7650+396C/CT	1	11089733	rs12139042	acagcaaactcagca[C/T]agccaagaagcctca	[C/T]		2.12766
297	FRAP1_A3_159139A_7650+114A/AG	1	11090015		gttaaatattttgaa[A/G]tgtaaatgaaaagaa	[A/G]		1.06383
298	FRAP1_A7_156891G_7447+30G/GA	1	11092263	rs2275525	tgaggaaccgcacca[G/A]tgactagctcattaa	[G/A]		2.17391
299	FRAP1_A11_151297C_7089+183C/CA	1	11097857	rs2275522	ttggactctaacccc[C/A]ttggagcaagggctg	[C/A]		2.12766
300	FRAP1_A13_145240G_6909G/GA,L2303L/L	1	11103914	rs11121691	cctggccaagctgct[G/A]tggctgaaaagcccc	[G/A]	Leu 2303 Leu	26.5957
301	FRAP1_A13_145110C_6811-32C/CA	1	11104044	rs17235633	acatgtcttaggctg[C/A]tctcttactgaacag	[C/A]		2.12766
302	FRAP1_A14_144582C_6810+51C/CT	1	11104572		cgtggcagggaatct[C/T]cgtagcgctgctttt	[C/T]		3.19149
303	FRAP1_A15_142078G_6662+66G/GA	1	11107076	rs868080	tcctacatttgtctc[G/A]tgtagtcatgtatta	[G/A]		2.12766
304	FRAP1_A16_139670T_6352-44T/TC	1	11109484	rs3737611	attgcgtttaaattc[T/C]tccctggaggcagaa	[T/C]		2.12766
305	FRAP1_A18_138674A_6034-30A/G	1	11110480	rs1770344	gttagctgattcttg[A/G]tgcttctctccttct	[A/G]		0
306	FRAP1_A18_138555G_6033+49G/GA	1	11110599		ctggtcccttagctg[G/A]tgggcgcaagtggga	[G/A]		2.12766
307	FRAP1_A23_136041G_5613+60G/GA	1	11113113		gctctctgagaaatg[G/A]aatcgttgttaagct	[G/A]		1.06383
308	FRAP1_A23_135921T_5553C/CT,S1851S/S	1	11113233	rs2275527	cagcaacagtgagag[C/T]gaggccgagagcacc	[C/T]	Ser 1851 Ser	26.5957
309	FRAP1_A25_132318T_5246+159T/TC	1	11116836		accaaagcatactgc[T/C]ctcaaagtctctgcc	[T/C]		1.06383
310	FRAP1_A25_131976T_5131-68C/CT	1	11117178	rs3730381	tgcctatcagatgaa[C/T]ggtagctcccttcct	[C/T]		2.12766
311	FRAP1_A27_126686C_4873-166C/CA	1	11122468	rs12121277	cacgcctgtaatccc[C/A]gctactcgggaggct	[C/A]		2.12766
312	FRAP1_A27_126630G_4873-222G/GA	1	11122524		agatgctgaaacccc[G/A]tctctactaaaaata	[G/A]		6.38298
313	FRAP1_CNS8_123018G_4872+1156G/GT	1	11126136		ttttgatggaaaatt[G/T]tctcctgggcaccag	[G/T]		1.06383
314	FRAP1_A28_121914G_4872+52G/GT	1	11127240		ccctaccccttccag[G/T]acctgggtgagtgcc	[G/T]		1.06383
315	FRAP1_A28_121509G_4731G/A,A1577A	1	11127645	rs1057079	tgctgaattaactgc[G/A]atggcaggagagagt	[G/A]	Ala 1577 Ala	28.7234
316	FRAP1_A30_119877T_4686+43T/TA	1	11129277	rs2275942	tcagtgaggaaaaga[T/A]tgtagtgcttctaag	[T/A]		2.12766
317	FRAP1_CNS7_119298G_4571-421G/A	1	11129856	rs2791643	tattttcaattgttt[G/A]gaggaaaatgtaatt	[G/A]		26.5957
318	FRAP1_CNS7_119142T_4571-577T/TA	1	11130012		tgacacagagagcac[T/A]gtgctgtgacctagc	[T/A]		1.06383
319	FRAP1_CNS7_118990A_4571-729A/AC	1	11130164		ccttgtaaaattggc[A/C]gccctgtagtttgca	[A/C]		1.06383
320	FRAP1_A31_116117C_4470-167C/CA	1	11133037		accgggtcatagaaa[C/A]aacaaatagcccatt	[C/A]		3.19149
321	FRAP1_A32_109555C_4469+197C/CA	1	11139599		tgctaagtaggaagg[C/A]cttcacttaaacttt	[C/A]		1.08696
322	FRAP1_CNS4_88151T_4254-10842C/CT	1	11161003	rs17036458	agtcgtgtgctttga[C/T]attctggggttgtgc	[C/T]		2.12766
323	FRAP1_CNS4_88093C_4254-10900C/CG	1	11161061		tcatcatttttacaa[C/G]acgcctctgacaggc	[C/G]		1.06383
324	FRAP1_A34_66912C_4050C/CT,I1350I/I	1	11182242		cacctcacaagacat[C/T]gctgaagtcacacag	[C/T]	Ile 1350 Ile	1.08696
325	FRAP1_A35_66737T_3945-70T/TG	1	11182417	rs11121697	ccaaaagcgaattga[T/G]aggtgtgactttgag	[T/G]		2.12766
326	FRAP1_A36_61739T_3802-68T/TG	1	11187415	rs2273127	agaataatcattaaa[T/G]agatgaggacttttt	[T/G]		2.12766
327	FRAP1_A39_53950G_3399-86G/GA	1	11195204		attcccatccctttg[G/A]tgctgattgttaagc	[G/A]		1.06383
328	FRAP1_A40_53576C_3286-26C/CT	1	11195578		gacctgactattcat[C/T]accatgcttttgctc	[C/T]		1.06383
329	FRAP1_A40_53419A_3286-183A/AG	1	11195735		cagagaaagcaaagt[A/G]atatgtaagcaaata	[A/G]		1.06383
330	FRAP1_A41_53354T_3285+243T/TC	1	11195800	rs17374795	tattttatcccagac[T/C]aattttctttatttt	[T/C]		3.19149
331	FRAP1_A41_53149C_3285+38A/AC	1	11196005	rs12116957	cagagagattttctg[A/C]tttcctctgagtccc	[A/C]		2.12766
332	FRAP1_A42_50441_3117+78_3117+79het_insA	1	11198713		ttgaatgacatagac[*/A]tttttttcacggatc	ins - A		2.12766
333	FRAP1_A43_37949C_3030+107C/T	1	11211205	rs4845985	ctgtgcccctgagcc[C/T]aatgccttcctcccc	[C/T]		29.3478
334	FRAP1_A43_37934C_3030+92C/G	1	11211220	rs4845986	ttaattgtgcattct[C/G]tgtgcccctgagccc	[C/G]		29.3478
335	FRAP1_A43_37809C_2997C/T,N999N	1	11211345	rs1064261	gcccacgttccttaa[C/T]gtcattcgagtctgt	[C/T]	Asn 999 Asn	29.3478
336	FRAP1_CNS2_37406C_2780-186C/T	1	11211748	rs2076655	caaaaaccgtttact[C/T]cttgatggtgagagg	[C/T]		31.9149
337	FRAP1_CNS2_37101A_2780-491A/G	1	11212053	rs2788570	cctccctcccttgcc[A/G]ctgcccccgctgcca	[A/G]		26.5957
338	FRAP1_A45_35402_2650-54_26504294967244het_delTTG	1	11213752		agtatccgtgatact[TTG/*]gttgtaatcatgttg	del - TTG		1.06383
339	FRAP1_A45_35353G_2650-103G/GA	1	11213801		gtagctggtcatttg[G/A]atatgaactggggat	[G/A]		1.06383
340	FRAP1_A46_33901A_2422-81A/T	1	11215253	rs10864495	gggattacaggcatg[A/T]gccaccgtgcccggc	[A/T]		31.9149
341	FRAP1_A47_33814T_2422-168T/C	1	11215340	rs2024625	gtagagatggggttt[T/C]accatgttggctagg	[T/C]		29.7872
342	FRAP1_A47_33686T_2422-296T/C	1	11215468	rs2746639	gcagtggtgtgatct[T/C]ggctcactgcaacct	[T/C]		29.7872
343	FRAP1_A47_33615A_2422-367A/T	1	11215539	rs2746640	gcttttttaaaaaaa[A/T]ttttttattttattt	[A/T]		30.8511
344	FRAP1_A48_32925T_2332-98T/TC	1	11216229	rs17229172	gaaggaatttcttta[T/C]gactgagatggtctc	[T/C]		1.06383
345	FRAP1_A49_32093A_2209-152A/T	1	11217061	rs718206	tgcctgttgcagaaa[A/T]gtctgttgctcattg	[A/T]		29.7872
346	FRAP1_A50_28805A_2208+138A/G	1	11220349	rs7524202	cgcatttgtctgcaa[A/G]ggtccaaatgtttcc	[A/G]		29.7872
347	FRAP1_A53_24853T_1437T/C,D479D	1	11224301	rs1135172	ggcaatgcaggtgga[T/C]gccacagtcttcact	[T/C]	Asp 479 Asp	29.7872
348	FRAP1_A53_24726T_1413-103G/GT	1	11224428	rs2076656	tacccatctgtggta[G/T]ccctgcctgagtaac	[G/T]		2.12766
349	FRAP1_A54_23414T_1412+18G/GT	1	11225740	rs12141961	aagcacctctgttat[G/T]atttcaccttccact	[G/T]		2.12766
350	FRAP1_CNS1_20342C_1225+1457C/CT	1	11228812		ttttttaaggttagt[C/T]aaggttgttttatta	[C/T]		2.12766
351	FRAP1_CNS1_20288C_1225+1403C/G,dbSNP:4845987	1	11228866	rs4845987	gagggccctagattt[C/G]ttcttttgatgtggg	[C/G]		31.9149
352	FRAP1_A61_7804G_163-113G/C	1	11241350	rs2076657	taacttgtcttcttt[G/C]gtttgaactatacct	[G/C]		31.9149
353	FRAP1_A61_7584G_162+322A/AG	1	11241570	rs12142905	ttgggatgggtttgg[A/G]gagttgagagctagg	[A/G]		2.12766
354	FRAP1_A62_7001G_1-100A/AG	1	11242153	rs17229137	acaagggctaggggg[A/G]gatctgtgttgggtg	[A/G]		1.06383
355	FRAP1_A62_6980T_1-121T/C	1	11242174	rs4845988	ctttttagaatcccc[T/C]gcctgacaagggcta	[T/C]		31.9149
356	FRAP1_A63_4002G_1-3099G/C	1	11245152	rs2295079	gcgggcggtggggca[G/C]ggggcctgaagcggc	[G/C]		34.0426
357	FRAP1_A63_3939C_1-3162C/A	1	11245215	rs2295080	gattggtcctcaggg[C/A]tgggaaccctccttc	[C/A]		34.0426
358	FRAP1_A64_3608G_1-3493G/GA	1	11245546		tctcagaattacacc[G/A]ggaggggtcgcgaac	[G/A]		1.06383
359	HSPB2_A12_X2(159)_C/T	11	111289439	rs4252588	ggcctcgggc(C/T)gccccagctg	[C/T]	Ala 53 Ala	8.69565
360	HSPB2_A13_X2(331)_G/A	11	111289611	rs4252589	tggaccgccac(G/A)gcttcgtgtc	[G/A]	Gly 111 Ser	1.06383
361	HSPB2_A14_IVS2(CNS+106)_C/T	11	111290133	rs4252591	atgtgcccaa(C/T)gtcataggac	[C/T]		38.2979
362	HSPB2_A14_IVS2(CNS+130)_T/C	11	111290157		gagctcgcac(T/C)tggatgctga	[T/C]		1.06383
363	IGF1R_A1_CNS1(-68671)_C/T	15	96941663		cacttatacc(C/T)cgcactacgg	[C/T]		1.06383
364	IGF1R_A1_CNS1(-68541)_delAT	15	96941792		ataattgtatc(AT/*)gttgctgtca	del - AT		25.5319
365	IGF1R_A1_CNS1(-68429)_G/A	15	96941905		agtcatcggga(G/A)gtgcattaag	[G/A]		2.12766
366	IGF1R_A704_5UTR(2210)_A/G	15	97008124	rs8034564	tcgggaccgc(A/G)gccaagggag	[A/G]		40
367	IGF1R_A705_5UTR(-1829)_G/A	15	97008505		cgcgcccggg(G/A)cacgcggcgc	[G/A]		1.06383
368	IGF1R_A705_5UTR(-1760)_C/G	15	97008574	rs35554027	cgcccttccc(C/G)ctccgctccc	[C/G]		43.617
369	IGF1R_A705_5UTR(-1666-1657)_delG	15	97008667	rs36061670	gtagtagcct(G/*)ggggggggtcccctttct	del - G		21.2766
370	IGF1R_A705_5UTR(-1459)_ins20bp	15	97008874		cgcactcccc(*/GCCCACCCCTCCCCTCTCCT)gcccacccct	ins - GCCCACCCCTCCCCTCTCCT		40.2174
371	IGF1R_A2_Prom(-1066/1067)_DelGC	15	97009266	rs10679407	gcgggccagg(gc/*)gcgcgcgcgc	del -GC		48.7805
372	IGF1R_A2.2_Prom(-646)_C/T	15	97009688		gagcgcggcg(C/T)ggccggcccg	[C/T]		5.55556
373	IGF1R_A4_Prom(-328)_C/T	15	97010006	rs13379905	ttgcagtttt(C/T)cccccttcct	[C/T]		4.25532
374	IGF1R_A6_X2(+288)_C/T	15	97068507		tcgagagcct(C/T)ggagacctct	[C/T]	Thn 98 Ile	1.06383
375	IGF1R_A7_IVS2(+20)_C/T	15	97068879	rs7174917	atgctgactg(C/T)tgctttctct	[C/T]		32.9545
376	IGF1R_A8_CNS3(+28054)_A/G	15	97096913		tgatattttg(A/T)ttacattaat	[A/T]		1.06383
377	IGF1R_A8_IVS2(CNS3)_(+28268)_G/T	15	97097127		aaaacccagt(G/T)gcttctttta	[G/T]		4.25532
378	IGF1R_A9_IVS2(CNS4)_(41469)_C/A	15	97110328	rs7166999	cttgttattt(C/A)ataatgaatg	[C/A]		40.4255
379	IGF1R_A9_IVS2(CNS5)_(+52388)_G/A	15	97110579	rs6598542	taaccataac(G/A)ttcatggt	[G/A]		30.4348
380	IGF1R_A10_IVS2(CNS5)_(+52910)_G/A	15	97121247	rs2175796	tttttataac(G/A)atagctgtaa	[G/A]		1.08696
381	IGF1R_A05_Prom(-551-449)_delAGG	15	97122498		gagcggagcc(AGG)aggaggagga	del - AAG		41.4894
382	IGF1R_A4_Prom(-276)_C/T	15	97122773		acgccgacag(C/T)ccgccccggc	[C/T]		10.6383
383	IGF1R_A4_Prom(-57)_C/T	15	97122992	rs28635085	cttttctttt(C/T)tttttttttt	[C/T]		4.25532
384	IGF1R_A11_IVS2(CNS6)_(+68886)_G/C	15	97137745		ttgtgacctt(G/C)tgtggtttct	[G/C]		9.57447
385	IGF1R_A11_IVS2(CNS6)_(+68986)_G/T	15	97137844	rs11857074	gctgcggtct(G/T)tttcccgggg	[G/T]		1.06383
386	IGF1R_A13_IVS2(CNS10/11)_(-47187)_A/G	15	97204890		atagaattac(A/G)tgagatatga	[A/G]		1.06383
387	IGF1R_A13_IVS2(CNS8/9)_(-47025)_G/A	15	97205052	rs2175797	gaatatcata(G/A)tttagttcaa	[G/A]		3.19149
388	IGF1R_A13_IVS2(CNS8/9)_(-46999)_G/T	15	97205078		taaacaaatt(G/T)tcacaattta	[G/T]		2.12766
389	IGF1R_A14_IVS2(CNS9)_(-38720)_C/G	15	97213357	rs8035410	gtgttccccc(C/G)actaagaaag	[C/G]		15.9574
390	IGF1R_A14_IVS2(CNS10/11)_(-38673)_C/T	15	97213404		cacatcccag(C/T)cccggggccc	[C/T]		1.06383
391	IGF1R_A16_IVS2(CNS11)_(-13241)_G/A	15	97238836		gcagtgtatc(G/A)gtagcattga	[G/A]		4.25532
392	IGF1R_A16_IVS2(CNS11)_(-13205)_T/C	15	97238872		cagtaagcca(T/C)gtaattgccc	[T/C]		1.06383
393	IGF1R_A17_IVS2(CNS12/13)_(-4479)_C/T	15	97247598		cacacttgct(C/T)acgttctctt	[C/T]		2.12766
394	IGF1R_A17_IVS2(CNS12/13)_(-4478)_A/G	15	97247599	rs11247379	acacttgctc(A/G)cgttctcttg	[A/G]		31.9149
395	IGF1R_A18_X3_(+903)_C/A	15	97252339		tccacgacgg(C/A)gagtgcatgc	[C/A]	Gly 302 Gly	2.12766
396	IGF1R_A20_IVS5_(+3)_A/G	15	97260376		ctagaagggt(A/G)agtgccccaa	[A/G]		1.06383
397	IGF1R_A23_IVS7_(-20)_C/T	15	97273776	rs2272037	gaactttctc(C/T)gaacttaatt	[C/T]		34.0426
398	IGF1R_A23_X8_(+1659)_C/T	15	97273865		acatggtgga(C/T)gtggacctcc	[C/T]	Asp 553 Asp	1.06383
399	IGF1R_A23_X8_(+1686)_G/A	15	97273892	rs2228531	acaaggacgt(G/T)gagcccggca	[G/T]	Val 562 Val	1.06383
400	IGF1R_A23_X8_(+1784)_G/A	15	97273990		gaccatatcc(G/A)tggggccaag	[G/A]	Arg 595 HiS	1.06383
401	IGF1R_A23_IVS8_(+42)_A/G	15	97274076	rs951715	acacttcttc(A/G)caagctcact	[A/G]		41.4894
402	IGF1R_A26_IVS10_(-103)_C/T	15	97282797	rs28637929	tcaatagctc(C/T)ttctattcca	[C/T]		21.2766
403	IGF1R_A26_IVS10_(-92)_C/T	15	97282808	rs2684806	ttctattcca(C/T)ggttaagatt	[C/T]		36.1702
404	IGF1R_A26_X11_(+2298)_C/T	15	97282996	rs3743262	acaacatcac(C/T)gacccggaag	[C/T]	Thr 766 Thr	7.44681
405	IGF1R_A28_X13_(+2700)_C/T	15	97285354		acccggggaa(C/T)tacacagccc	[C/T]	Asn 900 Asn	2.12766
406	IGF1R_A28_IVS13_(21)_A/C	15	97285457	rs1464430	tggagggaga(A/C)gaaacgtgg	[A/C]		30.8511
407	IGF1R_A28_IVS14_(+30-31)_delGT	15	97285467	rs3841650	aagaaacgtg(gt/*)aaaactgaaa	del -GT		11.7021
408	IGF1R_A31_X16_(+3129)_G/A	15	97295748	rs2229765	gcatgcgtga(G/A)aggattgagt	[G/A]	Glu 1043 Glu	44.6809
409	IGF1R_A32_IVS17_(+58)_T/C	15	97296236	rs2293117	ttttccttta(T/C)aatctccctg	[T/C]		44.6809
410	IGF1R_A35_X20_(+3594)_C/T	15	97309332		gtaggtcctt(C/T)ggggtcgtcc	[C/T]	Phe 1198 Leu	1.06383
411	IGF1R_A36_IVS20_(-34)_G/A	15	97317779	rs2593053	gcgccctccc(G/A)gtttggaccc	[G/A]		37.234
412	IGF1R_A36_X21_(+4038)_C/T	15	97318128	rs17847203	gacagcctta(C/T)gcccacatga	[C/T]	Tyr 1247 Tyr	4.25532
413	IGF1R_A37_3UTR_(+55)_G/C	15	97318250	rs3825954	gcagcggggt(G/C)gggggggaga	[G/C]		1.06383
414	IGF1R_A37_3UTR_(+56-62)_delG	15	97318251		ggggt(G/*)gggggggagaga	del - G		1.06383
415	IGF1R_A37_3UTR_(+134)_C/T	15	97318329		ccttgctgcc(C/T)gcgggagaca	[C/T]		3.19149
416	IGF1R_A38_3UTR_(+417,418)_delCT	15	97318612		gtggctgtcc(ct/*)gtggccccat	del -CT		27.6596
417	IGF1R_A39_IVS21_(+70)_C/T	15	97319104	rs702497	ccctgcccaa(C/T)ccccaagaat	[C/T]		14.8936
418	IGF1R_A39_IVS21_(+34)_C/T	15	97319281	rs2016873	cccgaagcag(C/T)ctggcggaca	[C/T]		6.38298
419	IGF1R_A40_IVS21_(+247)_A/G	15	97319281	rs2016873	gaagaaaagc(A/G)gtcaatggat	[A/G]		5.31915
420	IGF1R_A40_IVS21(CNS13)_(+419)_insA	15	97319453		tgtacag(*/a)aaaaaaaaagc	ins - A		47.8723
421	IGF1R_A41_IVS21(CNS14)_(+4730)_C/T	15	97323764		cactcattag(C/T)gttttcaata	[C/T]		1.06383
422	IGF1R_A42_IVS21CNS15)_(+5930)_A/T	15	97324964		ttaaaaaaaa(A/T)tttttttaag	[A/T]		1.06383
423	IGF1R_A42_IVS21(CNS15)_(+6091)_C/T	15	97325125		aagaatttat(T/C)cctgttattg	[T/C]		1.06383
424	IGF1R_A43_IVS21(CNS16)_(+7009)_A/T	15	97326043		aaacatgccc(A/T)ggtttgctca	[A/T]		1.08696
425	IGF1R_A44_IVS21(CNS17)_(+7845)_A/G	15	97390918	rs2663101	ggagtttggg(A/G)gagaaaaaaa	[A/G]		6.38298
426	IGF1R_A44_IVS21(CNS17)_(+7890)_G/T	15	97390918	rs2663101	gagaaaaaaa(A/T)acacaacact	[A/T]		32.9787
427	IGF1R_A44_IVS21(CNS17)_(+7856)_A/T	15	97390929		acacaggtcg(G/T)taaatacaga	[G/T]		6.38298
428	IGF1R_A44_IVS21(CNS17)_(+7915)_A/G	15	97390943		accagccttg(A/G)ttacaagtgt	[A/G]		6.38298
429	IGF1R_A44_IVS21(CNS17)_(+8011)_G/C	15	97391039	rs28520207	gaggtgcagg(G/C)attttgtcaa	[G/C]		3.19149
430	IGF1R_A44_3UTR(IVS21)_(+8201)_G/T	15	97391229		actcggagag(G/T)ggacaaaacc	[G/T]		12.766
431	ING1_aX.1_2022A_1-217A/AG,dbSNP:12875067	13	110163105	rs12875067	agaacggtgtccatg[A/G]cacagggcgggaaga	[A/G]		27.6596
432	ING1_aX.1_2089C_1-150C/CG	13	110163172		acctcttctggggct[C/G]ggcactaggaagcag	[C/G]		1.06383
433	ING1_X2_2506_1-910_1-909het_insG	13	110163589		gccctacttatactg[*/G]ctctgtggggcgggg	ins - G		1.06383
434	ING1_X2_2507T_1-908T/TG	13	110163590	rs1441042	ccctacttatactgc[T/G]ctgtggggcggggac	[T/G]		27.6596
435	ING1_A1_2823G_1-592G/GC,dbSNP:2289461	13	110163906	rs2289461	cgcgagggccggcct[G/C]gagcccgcagccccc	[G/C]		29.7872
436	ING1_A1_2870G_1-545G/GT	13	110163953		aggggcgtgaatgcg[G/T]cggggggcggggccg	[G/T]		18.0851
437	ING1_A1_2900G_1-515G/GT	13	110163983		gttgccgggggaggg[G/T]gccggggcgcatgcg	[G/T]		1.06383
438	ING1_X2.2_3227G_1-188G/GA	13	110164310		gcgccctcaggcgct[G/A]gggtccccgcggacc	[G/A]		2.7027
439	ING1_aX.2_3737A_136+187G/GA	13	110164820	rs9555725	gtccttgtgtgcaaa[G/A]cccgggacacggagg	[G/A]		18.4783
440	ING1_aX3.1_22063C_1-646C/CT	13	110165116	rs7330080	ggcccttcttcgtcg[C/T]cccccactcagtccc	[C/T]		26.5957
441	ING1_aX3.1_22251C_1-458C/CG	13	110165304	rs7330469	cttttctctgtgtgc[C/G]gtagggaagggaagg	[C/G]		21.2766
442	ING1_aX3.1_22298C_1-411C/CT	13	#VALUE!		ggcggggaaggcgcc[C/T]atctgcgctgcgctc	[C/T]		1.06383
443	ING1_aX3.2_4548_1-161het_delA	13	110165631		gagttgggtgggggc[A/*]aaaaaaaaaattgac	del - A		20.2128
444	ING1_aX3.2_4568A_1-141A/AG,dbSNP:1441043	13	110165651	rs1441043	aaaaaattgaccgct[A/G]tccccgaaagtacta	[A/G]		27.6596
445	ING1_aX3.1_22346G_1-363G/GT	13	#VALUE!		tcgctggcttggaga[G/T]gactgtggcaggtga	[G/T]		1.06383
446	ING1_aX3.3_5082T_374T/G,L125R,dbSNP:7338333	13	110166165	rs7338333	ggcgggtgtcgcccc[T/G]gcccctctccccgct	[T/G]	Leu 125 Arg	0
447	ING1_aX3.3_5234C_526C/CT,L176L/L,dbSNP:9555726	13	110166317	rs9555726	tttcaggccgcatct[C/T]tgctgacccgagggt	[C/T]	Leu 176 Leu	27.6596
448	ING1_aX4.1_8320_14294967046_1-246dupTTGTG	13	110169403		ttgtgttgtgttgtg[*/TTGTG]gttagcacaggaaca	dupl - TTGTG		31.9149
449	ING1_X4.3_9310T_633+113T/A,dbSNP:4773242	13	110170393	rs4773242	tttaaagaatgttag[T/A]aaaggaaccattcct	[T/A]		0
450	ING1_X4.3_9378A_633+181G/GA,dbSNP:9588246	13	110170461	rs9588246	ttcattggtacacgt[G/A]taacaagaaagtggt	[G/A]		1.06383
451	ING1_X4.4_9570_633+372_633+373het_insT	13	110170653		attactttatgaaca[*/T]attttttttaattgg	ins - T		1.06383
452	ING1_AX4.7_10286G_633+1089G/C,dbSNP:1061386	13	110171369	rs1061386	caccatctgtttgaa[G/C]attatatgaagttta	[G/C]		24.4681
453	ING1_AX4.7_10603C_633+1406C/CT,dbSNP:4773243	13	110171686	rs4773243	gcaatcttggctcac[C/T]gcaacctccgcctcc	[C/T]		5.31915
454	ING1_Ap2_19467_1-773_1-772het_insTG	13	110180550		ggggacagggcttag[*/TG]ttcgtggaatacaca	ins - TG		1.06383
455	ING1_Ap2_19627_1-613_1-612het_insAAAAGCA	13	110180710		aatcagagaaaagca[*/AAAAGCA]ggcagccaagcgtgg	ins - AAAAGCA		1.08696
456	ING1_Ap2_19805_1-435_1-434het_insGG	13	110180888		ccggaaggggggggg[*/GG]ccggcgcgcggggcc	ins - GG		46.4286
457	KL_CNS1_2530_1-1480_1-1479het_insT	13	32487100		gttattgcctttaaa[*/T]tttgtattaaataat	ins - T		1.06383
458	KL_A1_2910T_1-1099T/C,dbSNP:4536339	13	32487480	rs4536339	catccaaatggacac[T/C]gtggctctgcaactt	[T/C]		0
459	KL_A1_3265_1-744delA	13	32487835		gagatctaatcaaag[*/A]tagagtgctggtttg	ins - A		24.4681
460	KL_A2_3614A_1-395G/A,dbSNP:1207568	13	32488184	rs1207568	cgcccccaagtcggg[G/A]aaagttggtcggcgc	[G/A]		19.1489
461	KL_A3_3829G_1-180G/GA	13	32488399		gcacccctcgccctc[G/A]gcgcccctgcccccg	[G/A]		1.06383
462	KL_A3_3844G_1-165G/A	13	32488414	rs2516569	ggcgcccctgccccc[G/A]cccccagtgccaggg	[G/A]		0
463	KL_A4_4281T_273T/C,D91D	13	32488851	rs2772364	tgcgtccatctggga[T/C]acgttcacccaccac	[T/C]	Asp 91 Asp	0
464	KL_A4_4334G_326T/TG,L109L/R	13	32488904	rs35239775	cccggaacgccagtc[T/G]gccgttgggcgcccc	[T/G]	Leu 109 Arg	4.44444
465	KL_A6_4894G_819+67G/GT	13	32489464	rs9315201	cacaggggccagggg[G/T]aagtgtgggaactga	[G/T]		4.34783
466	KL_CNS3_6530C_819+1703C/CA	13	32491100	rs576404	caacatgttttagat[C/A]tttttgcccactcat	[C/A]		40.4255
467	KL_CNS3_6678_819+1850dupT	13	32491248		gtgaatgctccattt[*/T]gctgatgttgcaaac	ins - T		0
468	KL_CNS3_6694_819+1868_819+1869het_delGT	13	32491264		ctgatgttgcaaaca[GT/*]actgttagttggtgt	del - GT		9.57447
469	KL_CNS3_6700C_819+1873T/C	13	32491270	rs2283368	ttgcaaacaaactgt[T/C]agttggtgtaaagta	[T/C]		9.57447
470	KL_CNS3_6709T_819+1882T/TG	13	32491279		aactgttagttggtg[T/G]aaagtattaattttg	[T/G]		1.06383
471	KL_CNS5_40283C_820-1051C/CT	13	32524853		acaaaggagtttctg[C/T]aggcccagggagtgg	[C/T]		1.06383
472	KL_CNS5_40452A_820-882A/AG	13	32525022	rs9527021	tcaaggaattcaaag[A/G]gaaagagaaactcac	[A/G]		23.4043
473	KL_CNS5_40493A_820-841A/AG	13	32525063	rs9527022	ggagaaaaaacccct[A/G]taattttcactcttc	[A/G]		23.4043
474	KL_A7_41098C_820-236C/CT	13	32525668	rs9536311	ctcaacccaaggaat[C/T]tacatttttccactg	[C/T]		23.4043
475	KL_A7_41123A_820-211G/GA	13	32525693	rs9527024	ccactgactgctaaa[G/A]accaatggaaataac	[G/A]		23.4043
476	KL_A7_41190A_820-144A/G	13	32525760	rs7323281	cctttgaaataatgt[A/G]ttggttctagctgat	[A/G]		23.4043
477	KL_A7_41255C_820-79C/CT	13	32525825	rs9536312	agaaacagatataat[C/T]tgatttggggattca	[C/T]		23.4043
478	KL_A7_41259T_820-75T/G	13	32525829	rs570875	acagatataatctga[T/G]ttggggattcaagta	[T/G]		0
479	KL_A7_41288C_820-46C/CG	13	32525858	rs9536313	tattatattgcattt[C/G]tcctcacaactagag	[C/G]		23.4043
480	KL_A7_41568G_1054T/TG,F352F/V	13	32526138	rs9536314	tctattctgcctgat[T/G]ttactgaatctgaga	[T/G]	Phe 352 Val	23.4043
481	KL_A8_41623C_1109G/GC,C370C/S	13	32526193	rs9527025	acttttttgctcttt[G/C]ctttggacccacctt	[G/C]	Cys 370 Ser	23.913
482	KL_A8_41669A_1155G/GA,K385K/K	13	32526239	rs9527026	ggaccctcacatgaa[G/A]ttccgccaattggaa	[G/A]	Lys 385 Lys	23.913
483	KL_A9_41987G_1330+143T/TG	13	32526557	rs7997728	gtagaatgcattcat[T/G]taacacctttctcat	[T/G]		23.4043
484	KL_A10_42575G_1331-39G/GA	13	32527145		atgcaagtgcccagc[G/A]aagggtcatgttgct	[G/A]		1.06383
485	KL_A10_42690T_1407T/TC,G469G/G	13	32527260		cgagtggcacagagg[T/C]tacagcatcaggcgt	[T/C]	Gly 469 Gly	3.19149
486	KL_A10_42889C_1599+7C/CA	13	32527459		tacattcaagtaagt[C/A]agctgacaaaaccaa	[C/A]		1.06383
487	KL_A11_48413C_1767C/CT,H589H/H	13	32532983	rs564481	actccaggaaatgca[C/T]gttacacattttcgc	[C/T]	His 589 His	39.3617
488	KL_A7_48893T_2247T/TC,A749A/A	13	32533463	rs648202	ggacaaagaggtggc[T/C]gagagagttttggaa	[T/C]	Ala 749 Ala	12.766
489	KL_A14.1_49265T_2619T/C,N873N,dbSNP:649964	13	32533835	rs649964	gtacataatatccaa[T/C]ggaatcgatgacggg	[T/C]	Asn 873 Asn	0
490	KL_A14.2_49369T_2701+22T/TA,dbSNP:650439	13	32533939	rs650439	agccctagctgcggc[T/A]atctcctgaaggtta	[T/A]		12.766
491	KL_A18_52475T_3039+722T/TC	13	32537045		gcacataggaaactt[T/C]tgataagtatctgcg	[T/C]		1.08696
492	KL_A20_53039A_3039+1286A/AG	13	32537609		gctgttttatagata[A/G]gtcaatattgtatca	[A/G]		3.19149
493	KL_A22_53647T_3039+1894T/TG	13	32538217		gagaagtaattttgc[T/G]ccttgataaagtatt	[T/G]		1.06383
494	KL_CNS7.1_56144C_3039+4391C/G	13	32540714		gcaatccttggtgaa[C/G]ttcagtttcctcatc	[C/G]		37.234
495	KL_CNS7.1_56145T_3039+4392T/C	13	32540715	rs9536338	caatccttggtgaac[T/C]tcagtttcctcatct	[T/C]		0
496	KL_CNS7.1_56438G_3039+4685G/GT	13	32541008	rs2858819	taaatttagaaaaac[G/T]aagccccacatttac	[G/T]		1.06383
497	KL_CNS7.2_56906T_3039+5153T/TC,dbSNP:675171	13	32541476	rs675171	ttgtctaattatggc[T/C]gtgaccataaatttt	[T/C]		40.4255
498	LMNA_CNS1_8197G_1-12016G/GA	1	154339318		tctataggtcttccc[G/A]taactgctgcgtccc	[G/A]		1.06383
499	LMNA_CNS2_11747C_1-8466C/T	1	154342868		acagagacacacaga[C/T]tcacacgcggccgcc	[C/T]		2.12766
500	LMNA_CNS3_18971T_1-1242T/C	1	154350092	rs2485662	aggatagagacccaa[T/C]attggctgtccagcc	[T/C]		31.9149
501	LMNA_CNS3_18999T_1-1214T/C	1	154350120	rs2485661	gcccccagccctgct[T/C]cccctttcaggcccc	[T/C]		2.12766
502	LMNA_CNS3_19369_1-845_1-844het_insC	1	154350490	rs28365858	aaaaagggacccccc[*/C]aaactccttgatccc	del - C		1.06383
503	LMNA_X1_20878T356+310T/C	1	154351999	rs547915	ggatttgccaactat[T/C]tggagccggggggag	[T/C]		3.19149
504	LMNA_CNS4_34123A_357-1788A/AG	1	154365244	rs528636	cagccagcagcagcc[A/G]ttagccttcagggta	[A/G]		3.19149
505	LMNA_CNS4_34193A_357-1718G/GA	1	154365314	rs543235	cagcccaaggagctc[G/A]gaatctaagttgccc	[G/A]		2.12766
506	LMNA_CNS5_35552A_357-359C/CA	1	154366673	rs509551	aggctaagtaaggcc[C/A]tgtgtgggaaggggc	[C/A]		2.12766
507	LMNA_CNS5_35642C_357-269T/TC	1	154366763	rs508641	attcatatcacgggg[T/C]agagctctgcccttg	[T/C]		2.12766
508	LMNA_CNS5_35741_357-171_357-170het_insG	1	154366862		ccttggggaggtggg[*/G]agcccagccccagag	ins - G		2.12766
509	LMNA_X2_35911C_357C/CT,R119R/R	1	154367032		ccctctcttctttag[C/T]aataccaagaaggag	[C/T]	Arg 119 Arg	1.06383
510	LMNA_X2_36242T_513+175T/TC	1	154367363	rs577492	ttatcctaatttggc[T/C]gccaatgggatctac	[T/C]		3.19149
511	LMNA_X3_39878G_639+56G/GT	1	154370999	rs11264442	tgatgacagacttgg[G/T]ctgggctagggggga	[G/T]		1.06383
512	LMNA_X3_39895C_639+73C/CT	1	154371016	rs11264443	tgggctaggggggac[C/T]agctgtgtgcagagc	[C/T]		1.06383
513	LMNA_X5_40531C_861T/TC,A287A/A	1	154371652	rs538089	caacctggtgggggc[T/C]gcccacgaggagctg	[T/C]	Ala 287 Ala	3.19149
514	LMNA_X6_41112G_937-83G/GT	1	154372233	rs646840	ggagagagtagccag[G/T]tgtctcctacaccga	[G/T]		3.26087
515	LMNA_X6_41431A_1157+16G/GA	1	154372552	rs534807	gtgggctggggagac[G/A]tcggggaggtgctgg	[G/A]		3.26087
516	LMNA_X6_41464C_1158-44C/CT	1	154372585		gtgtcctctggccgg[C/T]aactggccttgacta	[C/T]		1.08696
517	LMNA_X7_41688C_1338T/TC,D446D/D	1	154372809	rs505058	cgtggaggaggtgga[T/C]gaggagggcaagttt	[T/C]	Asp 446 Asp	3.19149
518	LMNA_X89_42366C_1489-41C/CT	1	154373487	rs553016	ggaggccttgggtgg[C/T]gatgggagcgctggg	[C/T]		3.26087
519	LMNA_X10_43037C_1698C/CT_H566H/H	1	154374158	rs4641	gctccatcaccacca[C/T]gtgagtggtagccgc	[C/T]	His 566 His	20.2128
520	LMNA_X11_43522C_1699-260C/CT	1	154374643	rs520973	ttttcctcttaagct[C/T]agagtagctagaaca	[C/T]		3.19149
521	LMNA_X11_43551C_1699-231T/TC	1	154374672	rs520910	cagagtcagagtcac[T/C]gctctggttctctgt	[T/C]		3.19149
522	LMNA_X11_43844G_1761G/GA,L587L/L	1	154374965		ctcgcgcaccgtgct[G/A]tgcgggacctgcggg	[G/A]	Leu 587 Leu	1.06383
523	LMNA_X11.2_44479C_1995+79G/GC	1	154375600	rs7339	ccccctgccctgcac[G/C]tcatgggagggggct	[G/C]		2.12766
524	LMNA_X12_44611_1995+211het_delA	1	154375732	rs35750865	gcaaaaaaaaaaaaa[A/*]gcatctatctcatct	del - A		9.57447
525	LMNA_X12.2_44884_1995+483_1995+484het_insGA	1	154376005		cagcctccgagaggg[*/GA]agagagagagagaga	ins - GA		3.125
526	LMNA_X12.4_45446C_1995+1046C/CT	1	154376567		agactcgtgggcatg[C/T]gcgcgcgtacacaca	[C/T]		4.25532
527	LMNA_CNS6_52364C_1995+7964C/CT	1	154383485		ctgaggaggtggagt[C/T]ggaagctgcgtggcc	[C/T]		11.3636
528	NOTCH1_A1_5UTR(CNS1)(-6628)_G/A	9	138566688		tctccgggccc(G/A)agaagcaccgc	[G/A]		2.12766
529	NOTCH1_A1_5UTR(-6249)_G/A	9	138566309	rs2990584	gcgggggggagt(G/A)tggggggacggaa	[G/A]		2.12766
530	NOTCH1_A2_5UTR(CNS2)(-5613)_C/A	9	138565672	rs3013313	gtggaagatc(C/A)cccccaccac	[C/A]		3.19149
531	NOTCH1_A2_5UTR(CNS2)(-5562)_A/G	9	138565621		gtttgggatc(A/G)tgggggtctg	[A/G]		1.06383
532	NOTCH1_A2_5UTR(-5385)_C/T	9	138565444	rs3013312	tggtgctaag(C/T)cgcctctgtg	[C/T]		25.5319
533	NOTCH1_A3_5UTR(-1085)_G/A	9	138561144	rs2990583	gcacgtggga(G/A)gggctgcgcc	[G/A]		11.1111
534	NOTCH1_A3_CNS3(PRO)(-614)_C/T	9	138560673	rs3013307	tcgccctcccca(C/T)tccgcctcgg	[C/T]		35.1064
535	NOTCH1_A3_CNS3(PRO)(-607)_T/C	9	138560666	rs3013306	actccgcc(T/C)cgggctcctccgc	[T/C]		37.234
536	NOTCH1_A5_CNS3(PRO)(-233)_C/T	9	138560292		gggagggagcg(C/T)aagggcgcggg	[C/T]		1.06383
537	NOTCH1_A6_X1(-151)_C/T	9	138560211	rs7028061	cccgggggcc(C/T)gcgagagcacag	[C/T]		30.4348
538	NOTCH1_A6_X1(-216)_13bpdel	9	138560146		gcggggcgcgg(gcgcgggcgcggg/*)gcgcgggcgcg	del - gcgcgggcgcggg		4.34783
539	NOTCH1_A8_IVS2(CNS5)(+71)_G/A	9	138558226		gccgcgcagg(G/A)gacagaacacta	[G/A]		1.06383
540	NOTCH1_A8_IVS2(CNS5)(+122)_G/A	9	138558175		gagtctgggcac(G/A)gtcacgtgctg	[G/A]		1.06383
541	NOTCH1_A9_IVS2(+1066)_C/T	9	138557231	rs3013305	cgtgcggaac(C/T)gctccctcct	[C/T]		38.2979
542	NOTCH1_A11_IVS2(CNS8)(-6430)_C/G	9	138551867		attgttttcc(C/G)ggctgcggga	[C/G]		6.38298
543	NOTCH1_A11_IVS2(CNS8)(-6344)_A/G	9	138551781		ggagccagagg(A/G)ggaaacctggc	[A/G]		1.06383
544	NOTCH1_A11_IVS2(CNS8)(-6166)_C/T	9	138544419	rs9411257	cgggccggccg(C/T)gacccccgccc	[C/T]		42.5532
545	NOTCH1_A13_IVS2(-2159)_A/G	9	138540411	rs7021932	tgccctccca(A/G)caggtgcccg	[A/G]		13.0435
546	NOTCH1_A13_IVS2(-1718)_G/A	9	138539971	rs11574866	ggagacactgg(G/A)gtgggaataag	[G/A]		2.12766
547	NOTCH1_A13_IVS2(-1595)_C/T	9	138539847	rs7030068	aggtgggctc(C/T)ggaaggcggg	[C/T]		44.4444
548	NOTCH1_A14_X3(+311)_T/C	9	138538081	rs4489420	cccctggacaa(T/C)gcctgcctcacc	[T/C]	Asn 104 Asn	43.0233
549	NOTCH1_A15_IVS3(-48)_C/A	9	138537510		gaaggcccggc(C/A)tcggggagcagt	[C/A]		1.06383
550	NOTCH1_A16_IVS4(-822)_C/T	9	138534660	rs3124607	tctctggctg(C/T)ctgcttttgc	[C/T]		32.9787
551	NOTCH1_A16_IVS4(CNS11)(-763)_A/G	9	138534601	rs3124606	cggtggggca(A/G)tgtctcagag	[A/G]		31.9149
552	NOTCH1_A16_IVS4(CNS11)(-650)_G/T	9	138534488		gttgccgaac(G/T)cgcctttctg	[G/T]		2.12766
553	NOTCH1_A16_IVS4(-350)_G/A	9	138534188	rs3125010	aagatggggt(G/A)tgcggccccc	[G/A]		31.9149
554	NOTCH1_A17_X5(+851)_G/A	9	138533729	rs2229975	tgccgctgccc(G/A)ccagagtggac	[G/A]	Pro 284 Pro	12.7907
555	NOTCH1_A17_IVS5(+244)_G/A	9	138533378		cgtttgcaacctg(G/A)ctccaggcagc	[G/A]		2.32558
556	NOTCH1_A17_IVS5(+250)_G/A	9	138533372		acctggctcca(G/A)gcagcccctgtg	[G/A]		1.16279
557	NOTCH1_A17_IVS5(+262)_G/A	9	138533360	rs10870078	tgaacagaca(G/A)gccctatgtt	[G/A]		12.7907
558	NOTCH1_A17_IVS5(+256)_G/A	9	138533354	rs9411209	gacaggccct(G/A)tgttcgggaat	[G/A]		33.7209
559	NOTCH1_A18_X6(+998)_C/T	9	138532964		aggactgcag(C/T)gagaacattga	[C/T]	Ser 332 Ser	1.06383
560	NOTCH1_A18_IVS6(-139)_G/A	9	138532705	rs3125009	ccccggaac(G/A)tcccaagtgtca	[G/A]		31.9149
561	NOTCH1_A18_IVS6(-140)_C/G	9	138532704		tcccccggaa(C/G)atcccaagtgt	[C/G]		1.06383
562	NOTCH1_A20_IVS8(+12)_C/T	9	138532018	rs9411208	atgcccggtgcgt(C/T)ggccggggcca	[C/T]		43.617
563	NOTCH1_A20_IVS8(+130)_A/G	9	138531894	rs4077029	acagcctgcac(A/G)gggcatgggga	[A/G]		48.9362
564	NOTCH1_A20_IVS8(+160)_G/C	9	138531864		gccaggccaca(G/C)ggccagcagag	[G/C]		1.06383
565	NOTCH1_A21_IVS8(-43)_C/T	9	138531701	rs9411254	cagtggggca(C/T)tggggccgcg	[C/T]		32.6087
566	NOTCH1_A21_IVS9(+10)_A/G	9	138531535		ggtgagggcc(A/G)cccccgcccc	[A/G]		31.9149
567	NOTCH1_A21_IVS9(+60)_G/T	9	138531485	rs11574886	cctgaggggt(G/T)cctgggcgtg	[G/T]		5.31915
568	NOTCH1_A21_IVS9(+102)_C/T	9	138531443	rs10781498	gccatctgca(C/T)cccggcctcc	[C/T]		31.9149
569	NOTCH1_A21_IVS9(+105)_C/T	9	138531440	rs11574887	atctgcaccc(C/T)ggcctcctga	[C/T]		5.31915
570	NOTCH1_A21_IVS9(+245)_C/T	9	138531300	rs3124605	ggggcctggc(C/T)gtggattgtg	[C/T]		31.9149
571	NOTCH1_A21_IVS9(+350)_T/C	9	138531195	rs3125007	accccggcct(T/C)ctgagggggg	[T/C]		31.9149
572	NOTCH1_A21_IVS9(+272)_C/T	9	138531117		gcccctgggc(C/T)gtctgcaccc	[C/T]		31.9149
573	NOTCH1_22 _IVS9(-133)_A/G	9	138530500	rs4880100	ggagagctgg(A/G)gctggctgag	[A/G]		32.9787
574	NOTCH1_A22_IVS9(-42)_C/T	9	138530410	rs4880099	aagggccatag(C/T)gctgttgcaca	[C/T]		40.2174
575	NOTCH1_A22_X10(+1635)_G/A	9	138530318		gtgtgtgcac(G/A)gaaggtgcgg	[G/A]	Thr 554 Thr	3.26087
576	NOTCH1_A22_X10(+1665)_C/T	9	138530288	rs11574889	agtgcctgga(C/T)ggacccaaca	[C/T]	Asp 545 Asp	1.08696
577	NOTCH1_A22_IVS10(+9)_C/T	9	138530245	rs3125006	aggtgcgggc(C/T)ggcgcccacc	[C/T]		11.9565
578	NOTCH1_A23_IVS10(-8)_A/G	9	138529998	rs3124603	cccgcccctccc(A/G)cggtccagggtac	[A/G]		34.0426
579	NOTCH1_A24_IVS13(+10)_G/A	9	138528773		gggtatgcggc(G/A)gggccgatcat	[G/A]		1.06383
580	NOTCH1_A24_IVS13(+70)_G/A	9	138528713	rs3812609	ccaggagggtg(G/A)cacctgcac	[G/A]		18.0851
581	NOTCH1_A24_IVS13(+206)_C/T	9	138528577	rs3125005	tgtgtgctgcg(C/T)gtccttgtggg	[C/T]		45.7447
582	NOTCH1_A25_X14(+2265)_T/C	9	138527753	rs2229971	tcaacaacaa(T/C)gagtgtgaat	[T/C]	Asn 755 Asn	29.5455
583	NOTCH1_A25_IVS15(+21)_G/A	9	138527273	rs3812608	ggtggggcct(G/A)tgctggaggg	[G/A]		48.8636
584	NOTCH1_A25_IVS15(+34)_C/T	9	138527260		ctggaggggg(C/T)ggggcctatg	[C/T]		1.06383
585	NOTCH1_A26_IVS15(CNS12)(-776)_C/T	9	138526320		tcctgcctgcc(C/T)gggtcaccgt	[C/T]		9.57447
586	NOTCH1_A26_IVS15(CNS12)(-773)_G/A	9	138526317		tgcctgcccgg(G/A)tcaccgtgga	[G/A]		9.57447
587	NOTCH1_A26_IVS15(-611)_T/C	9	138526155	rs3124600	acgtggttcc(T/C)acatagcctt	[T/C]		46.8085
588	NOTCH1_A27_X16(+2542)_G/A	9	138525470	rs35136134	caggcaatcc(G/A)aggactatgag	[G/A]	Glu 848 Lys	1.06383
589	NOTCH1_A27_IVS16(+20)_G/A	9	138525405		gccagggccc(G/A)gtgagggctgg	[G/A]		2.12766
590	NOTCH1_A27_IVS16(+74)_G/A	9	138525351	rs11574894	gcagctcccag(G/A)caggctagat	[G/A]		4.25532
591	NOTCH1_A27_IVS16(+103)_C/T	9	138525322	rs9411206	gaagaggagc(C/T)ggtgggtgct	[C/T]		45.7447
592	NOTCH1_A27_IVS16(+129)_G/A	9	138525296	rs3125003	aggccctggtc(G/A)gagaagttctg	[G/A]		2.12766
593	NOTCH1_A27_IVS16(-100)_C/T	9	138525182	rs3125002	cacggaagcc(C/T)actcctgggt	[C/T]		47.8723
594	NOTCH1_A27_IVS16(-89)_C/T	9	138525171		actcctgggt(C/T)gggagaggcac	[C/T]		1.06383
595	NOTCH1_A27_IVS16(-1)_G/A	9	138525082	rs3125001	cctcctgcccc(G/A)cagggcagac	[G/A]		39.3617
596	NOTCH1_A28_X17(2663)_C/T	9	138525003		agaacaccca(C/T)ggcggctaccg	[C/T]	His 887 His	2.17391
597	NOTCH1_A28_IVS17(+78)_G/T	9	138524980		tggtgcgcatg(G/T)tgctggccataa	[G/T]		3.26087
598	NOTCH1_A28_X17(2691)_C/T	9	138524975	rs11574895	cactgccaggc(C/T)ggctacag	[C/T]	Arg 898 Arg	2.17391
599	NOTCH1_A28_X17(2734)_C/T	9	138524932		cgacgactgc(C/T)ggcccagtgag	[C/T]	Arg 911 Trp	1.08696
600	NOTCH1_A28_IVS17(+12)_C/T	9	138524914	rs36119806	tgagtagccc(C/T)gcggctctggc	[C/T]		10.8696
601	NOTCH1_A28_IVS17(+117)_G/A	9	138524809	rs11574896	ggagtgtggcc(G/A)gggagggttg	[G/A]		9.78261
602	NOTCH1_A28_IVS17(+128)_G/A	9	138524798		gggagggttg(G/A)gtcaggtgtggg	[G/A]		2.17391
603	NOTCH1_A28_IVS17(+142)_delG	9	138524784		tcaggtgtgggg(g/*)atgtgctga	del - G		5.43478
604	NOTCH1_A28_IVS17(+188)_G/A	9	138524738		gccccagagcc(G/A)gcttgctcctc	[G/A]		3.26087
605	NOTCH1_A28_IVS17(+210)_T/G/A	9	138524716	rs11145766	cctgcacttc(G/A/T)cggaagagt	mixed		17.7778
606	NOTCH1_A30_IVS18(-31)_G/A	9	138523375	rs3124598	aatgccctcc(G/A)ctcagcccccg	[G/A]		45.7447
607	NOTCH1_A30_X19(+3075)_C/T	9	138523239		gtcaatgagtg(C/T)gactcacagcc	[C/T]	Cys 1024 Cys	1.06383
608	NOTCH1_A30_IVS19(+42)_G/A	9	138523101	rs11145765	aggggccct(G/A)ggtgggtgcc	[G/A]		8.51064
609	NOTCH1_A30_IVS19(+54)_G/A	9	138523089	rs3125000	ggtgggtgcct(G/A)cctgcgggaggt	[G/A]		45.7447
610	NOTCH1_A30_IVS19(+80)_insC	9	138523063		acggtcacccc(*/c)aggtcccact	ins - C		38.2979
611	NOTCH1_A30_IVS19(+220)_G/A	9	138522923	rs3812605	gagccggggc(G/A)ggagctca	[G/A]		47.8723
612	NOTCH1_A31_IVS19(-122)_T/C	9	138522780	rs3812604	gggcggcagt(T/C)tccacttctg	[T/C]		43.617
613	NOTCH1_A31_IVS19(-71)_G/A	9	138522729	rs3812603	gccccttggc(G/A)gatgtgcgtt	[G/A]		46.8085
614	NOTCH1_A31_IVS20(+22)_G/A	9	138522484	rs3124597	tgtgcccaccc(G/A)gctcgggtc	[G/A]		46.8085
615	NOTCH1_A31_X21(+3333)_C/T	9	138522405		caggtgttga(C/T)gttgcccgc	[C/T]	Asp 1010 Asp	1.06383
616	NOTCH1_A32_IVS22(+111)_A/G	9	138521467	rs11574902	cagaaactccc(A/G)ttttcctgtg	[A/G]		13.8298
617	NOTCH1_A32_IVS22(-152)_G/C	9	138521398	rs3829116	gggtcccagt(G/C)ggaagggcgt	[G/C]		39.3617
618	NOTCH1_A32_IVS22(-140)_T/C	9	138521386	rs7870145	ggaagggcgtc(T/C)ccacggcacc	[T/C]		13.8298
619	NOTCH1_A32_IVS22(-79)_C/T	9	138521325	rs3124596	acctgagcgct(C/T)gtcttccgggacg	[C/T]		46.8085
620	NOTCH1_A33_X23(+3836)_G/A	9	138521054		tgcgacgccc(G/A)tggcacccag	[G/A]	Arg 1278 His	2.12766
621	NOTCH1_A33_IVS24(+33)_G/A	9	138520767		gcaggggccc(G/A)ccaggggaga	[G/A]		1.06383
622	NOTCH1_A34_X25(+4132)_C/T	9	138520040		gtgcctgggc(C/T)ccttcacgggc	[C/T]	Pro 1375 Ser	2.12766
623	NOTCH1_A35_IVS25(+65)_C/T	9	138519518		tggcttgggcc(C/T)ggaggccagca	[C/T]		1.06383
624	NOTCH1_A36_IVS25(-85)_C/T	9	138519462	rs13300218	ggacgtcccccg(C/T)ggctggccagt	[C/T]		9.57447
625	NOTCH1_A36_IVS26(+55)_C/T	9	138518891	rs11574903	gggccctccc(C/T)gacggcctcc	[C/T]		25.5319
626	NOTCH1_A37_IVS26(-92)_A/G	9	138517695		actgtggcgtc(A/G)tgggcctcagt	[A/G]		11.7021
627	NOTCH1_A37_IVS26(-90)_G/T	9	138517693		tgtggcgtcat(G/T)ggcctcagtgt	[G/T]		11.7021
628	NOTCH1_A37_X27(+5094)_C/T	9	138517528	rs10521	agtgccaccga(C/T)gtggccgcatt	[C/T]	Asp 1699 Asp	31.9149
629	NOTCH1_A37_IVS27(+77)_G/C	9	138517378		acacgctggct(G/C)tttgtgccagt	[G/C]		12.766
630	NOTCH1_A37_IVS27(+119)_G/A	9	138517336		gttgccgtcc(G/A)agttggggta	[G/A]		1.06383
631	NOTCH1_A37_IVS27(+208)_C/T	9	138517247	rs11574905	ccacctgggaa(C/T)gagtccagcc	[C/T]		7.44681
632	NOTCH1_A38_IVS27(-374)_delGA	9	138517135		agaaaaaaaaa(GA/*)gagagagaga	del - GA		1.06383
633	NOTCH1_A39_IVS27(-43)_T/C	9	138516804	rs12344155	gcgtagccgc(T/C)gcctgatgtc	[T/C]		12.766
634	NOTCH1_39__X28(+5175)_C/T	9	138516754		caggtgagac(C/T)gtggagccgc	[C/T]	Thr 1724 Thr	1.06383
635	NOTCH1_A39_IVS28(+34)_G/A	9	138516511		ctgggtcccc(G/A)gtgggaggtg	[G/A]		2.12766
636	NOTCH1_A40_IVS29(-43)_T/C	9	138516229	rs3124594	cgggcacctgc(T/C)gccgggctgcc	[T/C]		47.8261
637	NOTCH1_A40_IVS30(+87)_A/T	9	138515934	rs11574906	tacagttgat(A/T)ctctggaaac	[A/T]		11.9565
638	NOTCH1_A41_IVS30(-12)_C/T	9	138515132	rs11574908	gcacccgtct(C/T)tgcctctgcag	[C/T]		6.38298
639	NOTCH1_A42_IVS33(+44)_T/C	9	138513128	rs9632944	gagggctgaa(T/C)ccacagagaa	[T/C]		12.766
640	NOTCH1_A43_X34(6555)_T/C	9	138511457	rs2229974	agtcccagga(T/C)ggcaagggctg	[T/C]	Asp 2186 Asp	47.8723
641	NOTCH1_A44_X34(+6853)_G/A	9	138511159		gcaccagcacc(G/A)tcctgggctcca	[G/A]	Val 2284 Ile	3.26087
642	NOTCH1_A47_X34(3UTR)(7794)_G/A	9	138510218	rs3124591	aaaataagaac(G/A)aggattttaa	[G/A]		43.617
643	NOTCH1_A49_X34(3UTR)(8759)_G/A	9	138509253	rs3124998	tgtgcaacgcc(G/A)tgggctgcgtcct	[G/A]		1.06383
644	NOTCH1_A49_X34(3UTR)(9007)_T/C	9	138509005	rs6563	cgtcagact(T/C)ggctcagctcg	[T/C]		42.5532
645	PGC1A_A1_5UTR(CNS1)(-41119)_delC	4	23541797	rs5856807	ctccctgtca(C/*)tgatccccagc	del - C		31.5217
646	PGC1A_A3_5UTR(CNS3)(-2040)_C/T	4	23502718		ataaacattga(C/T)tcttcttggcc	[C/T]		5.31915
647	PGC1A_A3_5UTR(CNS3)(-1999)_A/G/C	4	23502677	rs2946386	tcacagttgatc(G/C/A)ttgagggcaga	mixed		22.2222
648	PGC1A_A3_CNS3(-1894)_G/C	4	23502572		ttgtggggagt(G/C)cagagtaatgc	[G/C]		1.06383
649	PGC1A_A3_5UTR(CNS3)(-1890)_G/A	4	23502568		ttcccgaggtt(G/A)tattttcctgt	[G/A]		1.06383
650	PGC1A_A3_CNS3(-1886)_C/T	4	23502564		tgagggcagag(C/T)caatgacctt	[C/T]		5.31915
651	PGC1A_A3_5UTR(CNS3)(-1844)_G/T	4	23502522		tcccgaggtt(G/T)tattttcctg	[G/T]		1.06383
652	PGC1A_A3_5UTR(CNS3)(-1798)_G/A	4	23502467	rs2970869	tctgctgttt(G/A)taaaagggaa	[G/A]		21.2766
653	PGC1A_A4_Prom(-1293)_A/G	4	23501971	rs7695542	atctcctggg(A/G)acttggaagg	[A/G]		5.31915
654	PGC1A_A5_Prom(-558)_A/C	4	23501236		tagtcccaaa(A/C)tgagcttgag	[A/C]		1.11111
655	PGC1A_A8_X2(290)_C/T	4	23495486		aatgagcctt(C/T)aaacatattt	[C/T]	Ser 74 Leu	1.06383
656	PGC1A_A8_IVS2(52)_C/A	4	23495421	rs2946385	ggcttgggcc(C/A)gactaacatg	[C/A]		40.4255
657	PGC1A_A9_IVS2(CNS5)(10189)_T/C	4	23485284	rs28540897	cctttttttt(T/C)ttttaggggg	[T/C]		31.9149
658	PGC1A_A9_IVS2(CNS5)(10194)_delT	4	23485279	rs10653665	tttttctt(T/*)agggggaaaa	del - T		27.6596
659	PGC1A_A9_IVS2(CNS5)(10540)_G/A	4	23484932	rs10028665	tatttataat(G/A)gtgaagcttc	[G/A]		31.9149
660	PGC1A_A9_IVS2(CNS5)(10424)_C/T	4	23484816		tctgtttctg(C/T)gagctgcagc	[C/T]		5.31915
661	PGC1A_A10_IVS2(CNS6)(18037)_C/A	4	23477435		ttcacagtac(C/A)gaacaagttt	[C/A]		3.19149
662	PGC1A_11-_IVS2(-19188)_G/A	4	23461660		ttaacaattaa(G/A)tttaaatgtat	[G/A]		1.06383
663	PGC1A_A12_IVS-2(CNS8)(-4375)_A/G	4	23446847		gagctaagac(A/G)tatatttttt	[A/G]		1.06383
664	PGC1A_A14_IVS4(+164)_A/G	4	23440020	rs2305681	cgcttgagct(A/G)ctttaaacta	[A/G]		2.12766
665	PGC1A_A15_IVS4(CNS9)(-285)_T/A	4	23439610		ccagccgatt(T/A)tttttattca	[T/A]		1.06383
666	PGC1A_A15_IVS4(CNS9)(-284)_delT	4	23439609		ccagccgattt(T/*)tttttattca	del - T		1.06383
667	PGC1A_A15_IVS4(CNS9)(-112)_T/C	4	23439437		atagatctag(T/C)acacttagac	[T/C]		1.06383
668	PGC1A_A15_IVS4(CNS9)(-40)_A/G	4	23439365	rs35133598	gataaggttc(A/G)gttcactaat	[A/G]		2.12766
669	PGC1A_A15_IVS4(CNS9)(-11)_T/C	4	23439336	rs2290604	tctttatgcc(T/C)tgtttttaag	[T/C]		11.7021
670	PGC1A_A16_IVS5(89)_T/C	4	23439032	rs17847350	aacttcttgc(T/C)tccgtcccat	[T/C]		2.12766
671	PGC1A_A18_IVS7(CNS10)(3798)_A/G	4	23429123		ctcttttgac(A/G)aaagaaaata	[A/G]		1.06383
672	PGC1A_A19_X8(1251)_G/A	4	23425022	rs2970847	aattccaaaac(G/A)gaaatactcat	[G/A]	Thr 394 Thr	26.5957
673	PGC1A_A20_X8(1494)_C/T	4	23424779	rs17574213	ctgtttttga(C/T)gacgaagcag	[C/T]	Asp 475 Asp	8.51064
674	PGC1A_A20_X8(1513)_G/A	4	23424760	rs8192678	agacaagacc(G/A)gtgaactgag	[G/A]	Gly 482 Ser	25.5319
675	PGC1A_A20_X8(1653)_G/A	4	23424620	rs3755863	gggatggcac(G/A)caatcctatt	[G/A]	Thr 528 Thr	32.9787
676	PGC1A_A21_IVS8(19)_C/G	4	23424392		tggcaaaacc(C/G)taataacaca	[C/G]		1.06383
677	PGC1A_A22_X9(1904)_C/T	4	23423805	rs3736265	agacaccgca(C/T)gcaccgaaat	[C/T]	Thr 612 Met	8.51064
678	PGC1A_A22_IVS9(-50)_G/A	4	23423638		tattcatttt(G/A)ctcatgaaaa	[G/A]		1.06383
679	PGC1A_A24_IVS11(CNS11)(87)_A/G	4	23412858		ggagttgcca(A/G)tgtaagtgct	[A/G]		1.06383
680	PGC1A_A24_IVS11(CNS11)(-151)_G/A	4	23412753		ccagaaataa(G/A)tatttagctg	[G/A]		1.06383
681	PGC1A_A26_3UTR(X13)(2911)_G/A	4	23406098	rs6821591	atgaagacac(G/A)cttaaaacct	[G/A]		43.4783
682	PGC1A_A26_3UTR(X13)(2959)_A/T	4	23406050	rs2932963	caaaaggaaa(A/T)atatatatata	[A/T]		31.9149
683	PGC1A_A28_3UTR(X13)(3666-3669)_delTCAA	4	23405343		atttttcttaa(TCAA/*)caagaatattc	del - TCAA		1.06383
684	PGC1A_A29_3UTR(X13)(4241)_C/G	4	23404768		tttcccttgg(C/G)agagtatgac	[C/G]		1.06383
685	PGC1A_A29_3UTR(X13)(4269)_T/A	4	23404740		atttatctgta(T/A)tttttacag	[T/A]		1.06383
686	PGC1A_A31_3UTR(X13)(4847)_G/A	4	23404162	rs3774923	tgtgttctga(G/A)tgaatccact	[G/A]		6.38298
687	PGC1A_A33_3UTR(X13)(5567)_T/A	4	23403442		tcagcataga(T/A)ctgtaggatt	[T/A]		1.06383
688	PGC1A_A33_3UTR(X13)(5588)_C/T	4	23403421		tttagaagac(C/T)gtgggccatt	[C/T]		5.31915
689	PGC1A_A33_3UTR(X13)(5659)_A/G	4	23403350	rs2279525	gtgctttagt(A/G)atgtggattt	[A/G]		35.1064
690	PGC1A_A33_3UTR(X13)(5674-5675)_delCT	4	23403335		ggattttttt(CT/*)tttttaaaag	del - CT		1.06383
691	PGC1A_A33_3UTR(X13)(5861)_C/T	4	23403148		tagatgtgag(C/T)ttccagtagg	[C/T]		2.12766
692	PGC1A_A33_3UTR(X13)(5875)_T/A	4	23403134	rs17847356	cagtaggtaa(T/A)gattatgtgt	[T/A]		4.25532
693	PGC1A_A36_CNS13(18907-18908)_delGA	4	23383836	rs33993752	aaaaaaaaga(GA/*)aatattagtt	del - GA		11.7021
694	PGC1A_A36_CNS13(19079)_A/T	4	23383664		aagctggaag(A/T)tgaatagagt	[A/T]		10.6383
695	PPARG_A3_5UTR(-62681)_G/A	3	12305411	rs17036170	agaggcagca(G/A)aggttaacag	[G/A]		1.06383
696	PPARG_A3_5UTR(-62370)_delT	3	12305730	rs17036179	ccttatatcatttttttt(T/*)gcagtgctctt	del - T		1.06383
697	PPARG_A3_5UTR(-62311)_A/G	3	12305789		gtcataggct(A/G)acggttgtaa	[A/G]		1.06383
698	PPARG_A4_5UTR(-42793)_A/G	3	12325307		cactgagaaa(A/G)tagaattgaa	[A/G]		1.06383
699	PPARG_A5_5UTR(-39099)_G/A	3	12328993	rs13073869	gtattgaaaa(G/A)tatccctttt	[G/A]		32.9787
700	PPARG_A6_5UTR(CNS2)(-32323)_G/A	3	12335769	rs11128599	aagtacagca(G/A)ctcccactgg	[G/A]		32.9787
701	PPARG_A6_5UTR(CNS2)(-32207)_delG	3	12335885		caatcatttt(G/*)taggagtata	del - G		22.3404
702	PPARG_A7_5UTR(-11682)_G/A	3	12356410	rs11128602	tcttgctcac(G/A)caagcttcct	[G/A]		32.9787
703	PPARG_A7_5UTR(CNS3)(-11214)_T/C	3	12356878		ataacaaaaa(T/C)ataattagga	[T/C]		1.06383
704	PPARG_A8_Prom(-820)_C/T	3	12367272	rs7649970	tagcacttat(C/T)gtttaaacat	[C/T]		23.4043
705	PPARG_A8_Prom(CNS4)(-796)_A/G	3	12367296	rs12486170	ttgatgttca(A/G)acatcagctg	[A/G]		28.7234
706	PPARG_A8_Prom(-300)_C/G	3	12367792	rs4135245	tgtgggtcac(C/G)ggcgagacag	[C/G]		1.06383
707	PPARG_A9_X1(+34)_C/G	3	12368125	rs1801282	tcctattgac(C/G)cagaaagcga	[C/G]	Ala 12 Pro	23.4043
708	PPARG_A9_IVS1(+40)_G/A	3	12368213		ggacgtgggg(G/A)catttatgta	[G/A]		1.06383
709	PPARG_A10_IVS1(-6913)_C/T	3	12389290		atttttgttg(C/T)actacttcat	[C/T]		6.38298
710	PPARG_A10_IVS1(-6783)_T/C	3	12389420	rs6809832	ctaaagactt(T/C)agcctgcttg	[T/C]		13.8298
711	PPARG_A11_IVS1(-170)_T/C	3	12396033	rs17036428	ctttctatca(T/C)aaaacagcct	[T/C]		1.06383
712	PPARG_A11_IVS1(-136)_T/C	3	12396067		aaggtggtta(T/C)gttcttttct	[T/C]		2.12766
713	PPARG_A11_IVS1(-114)_C/T	3	12396089	rs28763893	ttgttgtgag(C/T)gcccagatga	[C/T]		12.766
714	PPARG_A12_IVS3(+250)_insT	3	12398240	rs4135262	agaaagtgga(*/T)aaaagttggg	ins - T		44.6809
715	PPARG_A12_IVS3(+276)_T/C	3	12398266	rs4135263	ttgccccaca(T/C)ttgtttctcc	[T/C]		13.8298
716	PPARG_A18_X7(+1431)_C/T	3	12450557	rs3856806	tcacggaaca(C/T)gtgcagctac	[C/T]	His 447 His	17.3913
717	PPARG_A19_3UTR(+5327)_T/C	3	12456174		gtgggacttt(T/C)ctcttgtgac	[T/C]		1.11111
718	PPARG_A19_3UTR(CNS8)(+5356)_A/C	3	12456203	rs709159	ctaattttag(A/C)ctaatattac	[A/C]		27.7778
719	PPARG_A19_3UTR(+5517)_A/G	3	12456364		cctggggtct(A/G)tttagtgcca	[A/G]		1.11111
720	PPARG_A19_3UTR(+5528)_C/T	3	12456375	rs4498025	tttagtgcca(C/T)gggcttgact	[C/T]		21.1111
721	PPARG_A20_3UTR(+11117)_C/A	3	12461964	rs10440120	caaggccctc(C/A)ggcctgggga	[C/A]		16.3043
722	PPARG_A20_3UTR(+11134)_C/T	3	12461981		gggagcctcc(C/T)cgccccataa	[C/T]		6.52174
723	PPARG_A20_3UTR(+11200)_T/C	3	12462047	rs1152006	ctcaaagcca(T/C)aggaagtccc	[T/C]		33.6957
724	PPARG_A20_3UTR(+11249)_C/A	3	12462096	rs11714483	tccctcctgc(C/A)ctcaccctac	[C/A]		26.6667
725	PPARG_A20_3UTR(+11257)_T/C	3	12462104	rs11718656	gccctcaccc(T/C)accacccacc	[T/C]		31.1111
726	PPARG_A21_CNS10(18947)_A/C	3	12469794	rs2249407	ccttagatac(A/C)aacacaacaa	[A/C]		43.617
727	PPARG_A21_CNS10(19047)_A/G	3	12469894		accccttatag(A/G)tgaggaaact	[A/G]		14.8936
728	SCD_A1.1_CNS1/2(-1378)_C/A	10	102095874		ctgccagctc(C/A)atcacttactg	(C/A)		1.06383
729	SCD_A2_IVS2_UTR(-1300)_C/T	10	102095951		ggtgtggtgt(C/T)ggtgtcggca	(C/T)		1.06383
730	SCD_A1.1_CNS1/2(-1057)_G/C	10	102096195	rs2275656	ggaggcgcgg(G/C)cttggggatg	(G/C)		31.9149
731	SCD_A1.2_CNS1/2(-964)_G/C	10	102096288	rs2275657	gccggagtcc(G/C)gtgcggtccc	(G/C)		31.9149
732	SCD_A1.2_CNS1/2(-895)_T/C	10	102096357	rs670213	gcgtaccgag(T/C)cccccgcgct	(T/C)		41.4894
733	SCD_A1.2_CNS1/2(-850)_delC	10	102096402		ccgcgtcccc(c/*)aagctccaga	del - C		11.7021
734	SCD_A3_5UTR(-10)_C/G	10	102097241	rs1054411	tgatcccggcatc(G/C)gagagccaagatgccg	[G/C]		45.7447
735	SCD_A5_IVS2(+242)_insA	10	102098335	rs11446562	tttgaagtgt(*/A)gctgtgctggag	ins - A		35.1064
736	SCD_A5_IVS2(+244/245)_insAC	10	102098336	rs10635975	tttgaagtgt(AC/*)gctgtgctgg	ins - AC		35.1064
737	SCD_A6_IVS3(+25)_G/A	10	102102268		ctgctcagct(G/A)tttgtcctcc	(G/A)		1.06383
738	SCD_A7_IVS4(+74)_A/C	10	102104453	rs3071	ttttctcctg(A/C)gactttcaaa	(A/C)		19.1489
739	SCD_A8_IVS4(-76-80)_delTCCCC	10	102106199		agacagccca(tcccc/*)tcccaatta	del - TCCCC		50
740	SCD_A8_X5(+670)_A/C	10	102106301	rs2234970	tggcttgctg(A/C)tgatgtgctt	(A/C)	Met 224 Leu	50
741	SCD_A9_IVS5(-1537)_T/C	10	102108944	rs10883463	gacctgttgt(T/C)gttatcattc	(T/C)		11.7021
742	SCD_A9_IVS5(CNS6)(-1491)_C/T	10	102108990		tcccttatca(C/T)ctcacccttt	(C/T)		28.7234
743	SCD_A9_IVS5(CNS6)(-1489)_C/T	10	102108992		cttatcacct(C/T)accctttgtt	(C/T)		28.7234
744	SCD_A9_IVS5(CNS6)(-1230-1232)_delTCT	10	102109251		atgctcatct(tct/*)ctgccaaatt	del - TCT		11.7021
745	SCD_A12_X6(3UTR)(+1625)_G/C	10	102111225		aaattgtcgg(G/C)ggagagagtt	(G/C)		1.06383
746	SCD_A13_X6(3UTR)(+1839)_G/A	10	102111439		cgaggataaa(G/A)aaaagacatt	(G/A)		4.25532
747	SCD_A13_X6(3UTR)(+1952)_A/C	10	102111552		gaagtcttga(A/C)gttgggtgtt	(A/C)		6.38298
748	SCD_A14_X6(3UTR)(+1969)_A/G	10	102111569	rs3978768	tgtttccaga(A/G)ttggtaaaaa	(A/G)		31.9149
749	SCD_A14_X6(3UTR)(+2206)_T/G	10	102112177	rs10883465	tatatacatatatacattgcttagaacgttaaactattagagtat(T/G)tcccttccaaagagggatgtttggaaaaaactctgaaggagaggag	[T/G]		6.38298
750	SCD_A15_X6(3UTR)(+2577))_C/G	10	102112177	rs10883465	aacatctagcctaaagtata(C/G)aactgcctggggggcagggt	[C/G]		18.0851
751	SCD_A17_X6(3UTR)(+2993)_T/C	10	102112593	rs7849	caagcgctca(T/C)gttgagccag	(T/C)		18.0851
752	SCD_A17_X6(3UTR)(+3101)_G/A	10	102112702	rs11557934	cttggtgagg(G/A)tgccccgcct	(G/A)		3.19149
753	SCD_A20_X6(3UTR)(+3894)_C/T	10	102113494	rs1056901	gtaaggaaca(C/T)gattttcaag	(C/T)		11.7021
754	SCD_A20_X6(3UTR)(+4154)_delT	10	102113754		tatcacgatt(T/*)gcaggattcc	del - T		1.06383
755	SCD_A22_X6(3UTR)(+4612)_G/A	10	102114212	rs11557931	ttcagcacag(G/A)aattctcaag	(G/A)		2.12766
756	SCD_A24_IVS7(CNS8)(+153)_T/A	10	102114734	rs2167444	aaggtaactt(T/A)aggttaaact	(T/A)		18.0851
757	SCD_A24_IVS7(CNS8)(+170)_C/A	10	102114751	rs508384	aactctggga(C/A)gcaggaagcc	(C/A)		18.0851
758	SIRT1_A1_5UTR(-1195)_A/T	10	69313291		ctttaaacag(A/T)tagaaacgct	[A/T]		1.06383
759	SIRT1_A1_5UTR(-1138)_C/T	10	69313348	rs3758391	agatctacca(C/T)gggttatatg	[C/T]		28.7234
760	SIRT1_A1_Prom(CNS1)(-863)_A/C	10	69313623		atggaggcca(A/C)gtcatttcct	[A/C]		13.8298
761	SIRT1_A2_Prom(CNS1)(-521)_A/G	10	69313965	rs3740051	cttcctactt(A/G)ttaacaaaac	[A/G]		7.44681
762	SIRT1_A3_Prom(CNS1)(-263)_C/A	10	69314223	rs932658	ccacaaagagg(C/A)agggccgccgg	[C/A]		24.4186
763	SIRT1_A3_Prom(CNS1)(-139)_C/G	10	69314347	rs2394443	ggcgggagcgcc(C/G)agagggcgggggcgg	[C/G]		17.4419
764	SIRT1_A3_Prom(CNS1)(-123)_C/T	10	69314363		agggcgggggcgg(C/T)gatggggcggg	[C/T]		1.16279
765	SIRT1_A4_X1(+40)_T/C	10	69314525		gcccggcggc(T/C)ccccctcggc	[T/C]	Ser 14 Pro	1.06383
766	SIRT1_A4_X1(+48)_G/A	10	69314533		gctccccctc(G/A)gcggcggggg	[G/A]	Ser 16 Ser	1.08696
767	SIRT1_A5_IVS1(CNS2)(+451)_insT	10	69314936		tttgcaaact(*/T)gacacctgtg	ins - T		28.7234
768	SIRT1_A5_IVS1(+199)_C/T	10	69315114		ttcgctctttt(C/T)ctccgtccgtg	[C/T]		1.08696
769	SIRT1_A5_IVS1(326)_G/C	10	69315241		ttttgttaga(G/C)ctttttttttc	[G/C]		1.08696
770	SIRT1_A5_IVS1(+801)_C/T	10	69315286	rs12571880	ttgcttttct(C/T)ctctaccccc	[C/T]		1.06383
771	SIRT1_A6_IVS2(+106)_C/T	10	69317403		tgcaatggcg(C/T)gatctcggct	[C/T]		1.06383
772	SIRT1_A6_IVS2(+168)_G/C	10	69317465		ctcagcctcc(G/C)cagcagctgg	[G/C]		30.8511
773	SIRT1_A7_IVS2(-71)_A/T	10	69318575	rs2236318	gctaactcat(A/T)acttcagaaa	[A/T]		43.617
774	SIRT1_A8_IVS3(-35)_G/A	10	69321131	rs7896005	aaggtagaag(G/A)tttaatttta	[G/A]		30.8511
775	SIRT1_A8_IVS4(+7)_T/C	10	69321325		aaaggtacta(T/C)gaactcttct	[T/C]		2.12766
776	SIRT1_A9_IVS4(-1105)_G/A	10	69335393	rs2224573	acttttttgt(G/A)taatgtcaga	[G/A]		30.8511
777	SIRT1_A9_IVS4(CNS3.1)(-864)_delC	10	69335634		acatattcca(C/*)tattatggat	del - C		1.06383
778	SIRT1_A10_IVS4(-395)_delT	10	69336103		cttttttttt(T/*)aaatcaccct	del - T		1.06383
779	SIRT1_A11_X5(+994)_T/C	10	69336604	rs2273773	attcatagcc(T/C)tgtcagataa	[T/C]	Leu 332 Leu	7.44681
780	SIRT1_A12_IVS6(+132)_T/G	10	69338020	rs10997870	gttagcattt(T/G)ggaattttgg	[T/G]		30.8511
781	SIRT1_A13_IVS6(-103)_insT	10	69338915	rs35737493	gtttttttttt(*/T)aataattctg	ins - T		1.06383
782	SIRT1_A14_X8(+1606)_G/A	10	69342486		tcatgtttca(G/A)aagactcaag	[G/A]	Glu 536 Lys	1.06383
783	SIRT1_A17_X9_3UTR(+2453)_delT	10	69346566		tttttttttt(T/*)aaaaaaaaaaag	del - T		21.2766
784	SIRT1_A17_X9_3UTR(+2504)_delCTTT	10	69346623	rs35461348	aagactaacttt(cttt/*)cttttaaaggttc	del - CTTT		30.8511
785	SIRT1_A18_X9_3UTR(+2724)_T/C	10	69346836	rs4746720	cgctaaactt(T/C)tgattcttta	[T/C]		1.08696
786	SIRT1_A20_X9_3UTR(+3862)_delGT	10	69347974		agtgaagact(GT/*)tttcagctctt	del - GT		1.06383
787	SIRT1_A20_X9_3UTR(+3972)_C/T	10	69348084	rs2234975	aatacaaaac(C/T)agtgtttttt	[C/T]		9.57447
788	SIRT3_A1_Prom(CNS1)(-984)_G/A	11	227312	rs3817629	cctgccactc(G/A)aggttcctca	[G/A]		26.5957
789	SIRT3_A1_Prom(CNS1)(-881)_C/T	11	227209		tccgctcctc(C/T)gcccgcctgc	[C/T]		26.5957
790	SIRT3_A1_Prom(CNS1)(-759)_C/T	11	227087	rs1045288	gggcccggag(C/T)tctggctctg	[C/T]		25.5319
791	SIRT3_A1_Prom(CNS1)(-702)_G/A	11	227030	rs12293349	aagacccccg(G/A)cacagaagaa	[G/A]		1.06383
792	SIRT3_A2_Prom(CNS1)(-543)_G/A	11	226871	rs2272563	tgcgctccgg(G/A)caaaactctc	[G/A]		25.5319
793	SIRT3_A2_Prom(CNS1)(-483)_T/C	11	226811	rs519592	attgaggcgt(T/C)aaagagtgtg	[T/C]		25.5319
794	SIRT3_A4_Prom(CNS1)(-145)_G/A	11	226473	rs11246029	cgggggcggg(A/G)cgcggaggcg	[A/G]		30.2326
795	SIRT3_A4_X1(5UTR)(-53)_del14bp	11	226381		gaggcggggc(GGGGCGCCGCGGGC/*)cggggcgccg	del - GGGGCGCCGCGGGC		25.5319
796	SIRT3_A4_X1(5UTR)(-47)_C/T	11	226375		ggggccgggg(C/T)gccgggggcg	[C/T]		1.06383
797	SIRT3_A4_X1(5UTR)(-15)_C/T	11	226343	rs7118852	gcgcggaaca(C/T)ggcgttctgg	[C/T]		27.6596
798	SIRT3_A4_X1(238)_C/T	11	226091	rs28365927	cagggcattc(C/T)ggaggcagcc	[C/T]	Trp 80 Arg	15.9574
799	SIRT3_A5_IVS1(+154)_C/A	11	225894	rs9795476	tgtggacgtc(C/A)cttatggggg	[C/A]		25.5319
800	SIRT3_A5_IVS1(+288)_T/C	11	225760	rs11246025	agtactggga(T/C)tgctaggtcc	[T/C]		13.8298
801	SIRT3_A5_IVS1(+380)_G/A	11	225668		gatcgtaccc(G/A)tctccatagt	[G/A]		1.06383
802	SIRT3_A6_IVS1(-54)_A/G	11	223496		cgttcttgct(A/G)tcctgagatt	[A/G]		1.06383
803	SIRT3_A6_IVS2(+45)_A/C	11	223298	rs12365010	ccctcccctg(A/C)ctcctgccct	[A/C]		13.8298
804	SIRT3_A6_X3(+477)_G/T	11	223212	rs11555236	ccctgcagatc(G/T)ccggggagtg	[G/T]	Ser 159 Ser	13.8298
805	SIRT3_A7_X3(+552)_C/T	11	223137		aactcccatt(C/T)ttctttcaca	[C/T]	Phe 184 Phe	1.08696
806	SIRT3_A7_X3(+622)_G/A	11	223067	rs11246020	caagcccaac(G/A)tcactcacta	[G/A]	Val 208 Ile	13.8298
807	SIRT3_A8_X4(+785)_C/A	11	222961		tgccaaagac(C/A)cttcccaggg	[C/A]	Pro 262 His	1.06383
808	SIRT3_A7_IVS3(+128)_A/G	11	222855	rs547025	ggggacggcc(A/G)aaacctatcg	[A/G]		7.6087
809	SIRT3_A8_IVS4(+84)_G/A	11	222855	rs536715	gcattgtctc(G/A)aaaggacagt	[G/A]		13.8298
810	SIRT3_A9_IVS4(-609)_C/G	11	217332		tttccatctg(C/G)tccaaggcat	[C/G]		4.25532
811	SIRT3_A9_IVS4(-593)_A/G	11	214832	rs7934919	caaggcattt(A/G)tttatattaa	[A/G]		13.8298
812	SIRT3_A9_IVS4(CNS3)(-572)_G/T	11	214808	rs7946581	tgacgcaaag(G/T)gaagttgtgt	[G/T]		13.8298
813	SIRT3_A9_IVS4(-440)_G/A	11	214676	rs7946716	catgatcacc(G/A)aagctcaaac	[G/A]		13.8298
814	SIRT3_A9_IVS4(-349)_G/A	11	214585	rs11246015	ggactggtgt(G/A)gtctaccagg	[G/A]		13.8298
815	SIRT3_A10_X5(865)_C/A	11	214182		cgttgtgaag(C/A)ccgacattgt	[C/A]	Pro 289 Thr	1.06383
816	SIRT3_A10_IVS5(+4)_72bp-VNTR	11	214074		CCTGGAGGTT(*/VNTR)CCTTCCAGGG	VNTR - 72bp		42.4242
817	SIRT3_A10_IVS5(+30)_repeat_G/T	11	214048	rs570772	CAGGGAGGAG(G/T)CTGGAGGGCA	[G/T]		17.3913
818	SIRT3_A10_IVS5(+66)_GATAsite-T/C	11	214012	rs570857	ACAGGAGTCA(T/C)CTCATGGGCT	[T/C]		40
819	SIRT3_A10_IVS5(38)_C/T	11	213772		ggctggaggg(C/T)aggggaaggg	[C/T]		1.06383
820	SIRT3_A10_IVS5(putatX1)(280)_T/C	11	213745		acaggagtca(T/C)ctcatgggcc	[T/C]		3.19149
821	SIRT3_A11_IVS5(+2123)_del32bp	11	211902		tcagctttct(tttttttgtacaaatgcatacgtacagatggt/*)aattttaaac	del - tttttttgtacaaatgcatacgtacagatggt		13.8298
822	SIRT3_A11_IVS5(+2201)_C/T	11	211824	rs4980335	tattctgcag(C/T)ctgctgtttt	[C/T]		13.8298
823	SIRT3_A12_IVS5(-48)_G/A	11	209089	rs511744	catcctgagg(G/A)gcttgtaaag	[G/A]		31.9149
824	SIRT3_A12_IVS5(-19)_C/T	11	209060		gtgcccctca(C/T)gtttggccca	[C/T]		2.12766
825	SIRT3_A13_3UTR(+1608)_C/T	11	206290	rs10714	agacttgggc(C/T)gagcggtccc	[C/T]		6.38298
826	SIRT3_A14_3UTR(putatX2)(+1842)_C/T	11	206056	rs12226697	ggactgaagg(C/T)atttgtccct	[C/T]		4.25532
827	SIRT3_A14_3UTR(+1994)_C/T	11	205904	rs12226402	ccccacacta(C/T)gcccccccac	[C/T]		4.25532
828	TP53_A1_CNS_(-11810)_C/G	17	7532447	rs17883670	ccgattgggc(C/G)gccgcatccc	(C/G)		2.12766
829	TP53_A5_CNS3/4_(-10472)_G/C	17	7531109		cccggtgctg(G/C)gcgtagggaa	(G/C)		1.06383
830	TP53_A7_CNS5_(-9527)_A/G	17	7530164		cctccgtgca(G/A)ccctccggcc	(G/A)		1.06383
831	TP53_A7_CNS5_(-9470)_C/T	17	7530107		ttcatttctc(C/T)cgctgcccca	(C/T)		1.06383
832	TP53_A8_IVS2_(+38)_G/C	17	7520526	rs1642785	ccaccacccc(C/G)accccaaccc	(C/G)		39.1304
833	TP53_3_IVS3_(+25-40/+41-56)_16bpIns_acctggagggctgggg	17	7520369	rs17878362	ttgggctgggg(*/acctggagggctgggg)acctggagggctgggg	ins - acctggagggctgggg		24.4681
834	TP53_A10_IVS3_(-52)_G/A	17	7520367		gggctggggg(G/A)ctggggggct	(G/A)		1.06383
835	TP53_A10_IVS3_(-29)_C/A	17	7520344	rs17883323	ggacctggtc(C/A)tctgactgct	(C/A)		4.25532
836	TP53_A10_4_(108)_G/A	17	7520304	rs1800370	cccccttgcc(G/A)tcccaagcaa	(G/A)	Pro 37 Pro	2.12766
837	TP53_A10_4_(215)_G/C	17	7520197	rs1042522	gctgctcccc(C/G)cgtggcccct	(C/G)	Arg 72 Pro	38.2979
838	TP53_A11_IVS4_(-283)_C/T	17	7519562	rs1794287	cccagccact(C/T)aggaggctga	(C/T)		34.0426
839	TP53_A12_5_(+408)_A/G	17	7519247		tgttttgcca(A/G)ctggccaaga	(A/G)	Gln 137 Gln	1.06383
840	TP53_A13_6_(+639)_G/A	17	7518935	rs1800372	acacttttcg(A/G)catagtgtgg	(A/G)	Arg 213 Arg	1.06383
841	TP53_A13_IVS6_(+31)_G/A	17	7518871		ctctgggagg(A/G)ggggttaagg	(A/G)		1.06383
842	TP53_A14_IVS6_(-36)_G/C	17	7518369	rs17880604	tccccaaggc(G/C)cactggcctc	(G/C)		2.12766
843	TP53_A16_IVS9_(+12)_T/C	17	7517566		tactaagtct(T/C)gggacctctt	(T/C)		2.12766
844	TP53_A17_IVS10_(+30)_A/T	17	7514622	rs17880847	tcctggccct(A/T)ctcccctgcc	(A/T)		4.25532
845	TP53_A18_IVS10_(-49)_C/T	17	7513782	rs17881850	ggcacagacc(C/T)tctcactcat	(C/T)		1.06383
846	TP53_A20_11+UTR_(+2008)_G/A	17	7512826	rs17884306	gtggagtggc(G/A)tgatcttggc	(G/A)		4.25532
847	TP53_A22_IVS11(CNS8)_(252_to_257)_INS_caccgct	17	7512212	rs17880560	cggccacggc(*/cacggc)tggcacaagg	ins - CACCGCT		25.5319
848	TP53_A22_IVS11(CNS8)_(+288)_C/T	17	7512177	rs1614984	gcttctagga(C/T)tgggctgctt	(C/T)		40.4255
849	TP53_A24_IVS11(CNS8)_(+660)_C/T	17	7511805	rs9894946	agctcagtac(T/C)gcctgcccat	(T/C)		23.4043
850	TP53_A24_IVS11(CNS8)_(+669)_A/G	17	7511796	rs17887200	ctgcctgccc(A/G)tgctcctcag	(A/G)		9.57447
851	TP53_A24_IVS11(CNS8)_(+745)_T/C	17	7511720		cactgctctc(T/C)tggagccagt	(T/C)		1.06383
852	TP53_A24_IVS11(CNS8)_(+762)_A/G	17	7511703	rs17886760	cagtgcttga(A/G)ggggcagtca	(A/G)		8.51064
853	TP53_A24_IVS11(CNS8)_(+784)_C/T	17	7511681	rs17883048	acatggcttg(C/T)ccttcctcct	(C/T)		8.51064
854	TP53_A24_IVS11(CNS8)_(+792)_C/T	17	7511673		tgcccttcct(C/T)ctccctggtg	(C/T)		1.06383
855	TP53_A24_IVS11(CNS8)_(+810)_C/T	17	7511655	rs4968186	gtggtggaga(C/T)gggtgttagg	(C/T)		31.9149
856	TP53_A24_IVS11(CNS8)_(+811)_A/G	17	7511654	rs4968204	tggtggagat(A/G)ggtgttaggg	(A/G)		31.9149
857	TP53_A24_IVS11_(+862)_T/C	17	7511603	rs12949853	ctggggccac(T/C)agcctgtcag	(T/C)		31.9149
858	TP53_A24_IVS11_(+871)_A/G	17	7511594	rs17881556	cagcctgtca(A/G)ctcatcaacc	(A/G)		9.57447
859	TP53_A24_IVS11_(+917)_C/G	17	7511548	rs9914052	ccttgccttg(C/G)cccaaggatc	(C/G)		0
860	TP53_A19_11_UTR_(+1591)_C/A	17	7511241		ggcatttgca(C/A)ctacctcaca	(C/A)		1.06383
861	TP53_A20_11_UTR_(+1847)_C/T	17	7510985		aatctcaccc(C/T)atcccacacc	(C/T)		1.06383
862	TP53_A20_11+UTR_(+1943)_T/G	17	7510889		tgctcagggtcaatttcttttttctttttt(T/C)tttttttttttctttttctttgagactggg	(T/C)		1.06383
863	TP53_A1_CNS_(-11600)_InsC	17	7532237		taattcttaaagcacctgcaccgccccccc(*/C)gccgcctgcagagggcgcagcaggtcttgc	ins - C		12.766
864	UCP2_A2_CNS1_(-5331)_G/A	11	73372402	rs659366	ctgttcacgc(G/A)tcagttaccc	[G/A]		38.2979
865	UCP2_A2_CNS1_(-5315)_G/A	11	73372386		tacccccaca(G/A)gacgggtcag	[G/A]		3.19149
866	UCP2_A3_5UTR(X1)(-4837)_G/C	11	73371908		acacggcccc(G/C)ctggacgctg	[G/C]		4.25532
867	UCP2_A4_5UTR(X1)(-4548)_G/A	11	73371619		agtaggagct(G/A)gcaggcccgg	[G/A]		1.06383
868	UCP2_A4_5UTR(X1)(-4507)_G/T	11	73371578		cccgggcccc(G/T)cccccgaggc	[G/T]		3.19149
869	UCP2_A4_5UTR(X1)(-4467)_C/A	11	73371538		gcgcggagcc(C/A)cactgcgaagc	[C/A]		1.06383
870	UCP2_A4_5UTR(X1)(-4453)_ins13bp	11	73371524		tgcgaagccc(*/cactgcgaagccc)agctgcgcg	ins - cactgcgaagccc		4.25532
871	UCP2_A4_5UTR(X1)(-4415)_C/T	11	73371486		ccacgctcgcc(C/T)ggctcgtccga	[C/T]		4.25532
872	UCP2_A5_5UTR(X2)(-3157)_C/T	11	73370228	rs11549045	ctttgaagaa(C/T)gggacacctt	[C/T]		3.19149
873	UCP2_A6_IVS2(+747)_A/G	11	73369422	rs17132534	taaaacagca(A/G)gaacgaactg	[A/G]		4.25532
874	UCP2_A9_X4(+164)_C/T	11	73366752	rs660339	cgcgctacag(C/T)cagcgcccag	[C/T]	Ala 55 Val	41.4894
875	UCP2_A9_X4(+315)_G/A	11	73366601		tacccccaca(G/A)gacgggtcag	[G/A]	Gln 105 Gln	1.06383
876	UCP2_A10_IVS4(+410)_C/T	11	73366169		gccaaccctc(C/T)attttacaca	[C/T]		1.06383
877	UCP2_A10_IVS4(-430)_G/A	11	73366140	rs2735572	cagagcccca(G/A)acaaaaggtt	[G/A]		4.25532
878	UCP2_A10_IVS4(-394)_A/C	11	73366104		catggcagga(A/C)gaagtaaagc	[A/C]		1.06383
879	UCP2_A10_IVS4(-106)_T/A	11	73365816	rs2632725	ctggattcta(T/A)tcccaaaagc	[T/A]		4.25532
880	UCP2_A12_IVS6(-146)_delAAG	11	73364508	rs10535527	cggcctccaaaag(aag/*)tcctg	del - AAG		44.6809
881	UCP2_A13_X8(3UTR)(1085)_ins45bp	11	73363590		tccctctttc[*/cccacctcttccttccgctcctttacctaccaccttccctc]tacattctca	ins - cccacctcttccttccgctcctttacctaccaccttccctc		25.5319
882	UCP2_A14_CNS6(3UTR)(75)_A/C	11	73363285		caggggagga(A/C)ccacctgactt	[A/C]		1.06383
883	UCP3_A1_CNS1(-12673)_G/A	11	73408408	rs1685337	cagcctgggc(G/A)acagagtga	[G/A]		2.12766
884	UCP3_A1_CNS1(-12653)_G/A	11	73408388	rs11235974	cagcctgggcgacagagtgaaactgtgtct(G/A)aaaaaaaaaaatctatcctttggtttcctt	(G/A)		2.12766
885	UCP3_A1_CNS1(-12641)_insAAAA	11	73408376		aaaaaaaaaaa(*/AAAA)tctatcctttg	ins - AAAA		2.12766
886	UCP3_A1_CNS1(-12278)_insG	11	73408013		cagccaaaattggctgg(*/G)cgccaccctggcccagac	ins - G		2.12766
887	UCP3_A2_CNS2(-11767)_G/A	11	73407502		atgcggcagcc(G/A)ggctgagcagg	[G/A]		1.06383
888	UCP3_A2_CNS2(-11682)_A/G	11	73407417		ctctgctcct(A/G)cttgtggctg	[A/G]		6.38298
889	UCP3_A2_CNS2(-11302)_G/A	11	73407037	rs1726767	ctcagtacag(G/A)agatcctgta	[G/A]		2.12766
890	UCP3_A2_CNS2(-11294)_G/A	11	73407029		aggagatcct(G/A)taccccagct	[G/A]		13.8298
891	UCP3_A4_CNS4(-6421)_G/T	11	73402156		agacctaactc(G/T)ctccccctcaa	[G/T]		2.12766
892	UCP3_A6_CNS6_(-3186)_G/T	11	73398921	rs7123549	cttggctcca(G/T)cagtgtccatg	[G/T]		2.12766
893	UCP3_A6_CNS6_(-3121)_C/T	11	73398856		gtagataagcc(C/T)aaaatgcctta	[C/T]		4.25532
894	UCP3_A8_CNS6_(-2500)_C/T	11	73398235		agcaagacct(C/T)gtctctacta	[C/T]		1.06383
895	UCP3_A8_CNS6_(-2278)_C/G	11	73398013		ggcagcaggt(C/G)cacccccccat	[C/G]		1.06383
896	UCP3_A9_CNS6_(-2078)_C/T	11	73397813	rs1800849	tcaggtcagcc(C/T)gtgtgtataa	[C/T]		22.3404
897	UCP3_A9_IVS1(-1887)_C/T	11	73397622	rs1618727	ccctctccctt(C/T)tccttgttctc	[C/T]		2.12766
898	UCP3_A9_IVS1(-1828)_A/G	11	73397563		gtcagggctc(A/G)ctagctgcagc	[A/G]		1.06383
899	UCP3_A11_IVS2(CNS7)(-143)_C/G	11	73395215	rs1685326	aaaatgctgc(C/G)cagacacca	[C/G]		46.8085
900	UCP3_A11_X3(+473)_G/A	11	73394915		gcctccatcc(G/A)catcggcctc	[G/A]	Arg 95 His	1.06383
901	UCP3_A11_X3(+486)_T/C	11	73394902	rs1800006	catcggcctcta(T/C)gactccgtca	[T/C]	Tyr 99 Tyr	24.4681
902	UCP3_A12_IVS3(+93)_G/A	11	73394769	rs2075576	cagagccaggg(G/A)cggggggaagc	[G/A]		22.3404
903	UCP3_A12_IVS3(-97)_A/G	11	73394723		gctctgagtgg(A/G)catcaaggaag	[A/G]		1.06383
904	UCP3_A12_IVS3(-96)_C/T	11	73394722	rs11235972	ctctgagtgga(C/T)atcaaggaagc	[C/T]		22.3404
905	UCP3_A12_IVS3(-47)_A/G	11	73394673	rs1685325	catgtcccaga(A/G)tgctgcttag	[A/G]		50
906	UCP3_A12_IVS3(-46)_T/A	11	73394672	rs1726747	atgtcccagaa(T/A)gctgcttagta	[T/A]		50
907	UCP3_A13_IVS4(-77)_C/A	11	73393355	rs6413538	gccttgcagc(C/A)agggcatcca	[C/A]		3.19149
908	UCP3_A13_IVS4(-36)_C/T	11	73393314	rs2734828	ctccctcccca(C/T)ccatttcacatcc	[C/T]		25.5319
909	UCP3_A13_X5(819)_C/T	11	73393190	rs2075577	ctgctggacta(C/T)cacctgctcac	[C/T]	Tyr 210 Tyr	47.8723
910	UCP3_A14_IVS5(-82)_G/A	11	73392782	rs1726743	agggagttcac(G/A)gttgagttgggg	[G/A]		4.25532
911	UCP3_A14_IVS5(-63)_A/C	11	73392763		tggggacaaac(A/C)gtgcatacata	[A/C]		2.12766
912	UCP3_A14_X6(+901)_G/T	11	73392632		tggcctccccg(G/T)tggacgtggtg	[G/T]	Val 238 Leu	1.06383
913	UCP3_A15_IVS6(CNS8)(+310)_C/T	11	73392210	rs1565125	caccacactga(C/T)catggccagtg	[C/T]		22.2222
914	UCP3_A15_IVS6(CNS8)(+533)_C/T	11	73391987	rs1626521	ggtatttatca(C/T)ctcctgccttgt	[C/T]		32.2222
915	UCP3_A18_3UTR(2094)_insC	11	73389139	rs11372420	ctcttccccacccccccc(*/c)accacgcgct	ins - C		46.8085
916	UCP3_A18_3UTR(2122)_C/T	11	73389125	rs15763	cccccaccacg(C/T)gctcaatcat	[C/T]		34.0426
917	UCP3_A3_CNS3(-9269)_insT	11	73386466		gcccacctcct(*/T)tgaagccgc	ins - T		2.12766
918	UCP3_A17_3UTR(1462)_G/A	11	7339069		acgtgtatcccc(G/A)tgaaatctggt	[G/A]		1.06383
919	UCP3_A17_3UTR(1565)_C/T	11	7338966	rs647126	agcctggaggga(C/T)gccacccagcaa	[C/T]		46.8085
920	UCP3_A17_3UTR(1829)_T/C	11	7338702		ccttccctgtc(T/C)acctcaccag	[T/C]		1.06383
921	ZMPSTE24_P1_18897C_1-1269C/CG	1	40495262	rs7548758	taattttgttgaaag[C/G]aaagaactggaaacc	[C/G]		9.57447
922	ZMPSTE24_P1_19017A_1-1149G/GA	1	40495382	rs926830	tttaggcagggttga[G/A]aaattcaagatatta	[G/A]		31.9149
923	ZMPSTE24_P1_19212G_1-954G/GC	1	40495577		aatttttaagtcaaa[G/C]caatgtacaggcgtc	[G/C]		1.06383
924	ZMPSTE24_X1.1_19644C_1-522C/CG	1	40496009	rs11811211	gtcagttgcggccca[C/G]tcagtcagttccggc	[C/G]		1.08696
925	ZMPSTE24_X1.1_19840_1-326G/GA	1	40496205	rs3765483	ggaacccagcgtcaa[G/A]acgtgggggaagaat	[G/A]		9.57447
926	ZMPSTE24_X1.1_19972_1-194A/AG	1	40496337		aaactaggagggact[A/G]gggagagtctgcaag	[A/G]		1.08696
927	ZMPSTE24_X3_29880A_357+114A/AG	1	40506245	rs7516571	tgcctctctgtttgc[A/G]tagtccttggttacc	[A/G]		31.9149
928	ZMPSTE24_X4_30512A_474+83A/AC	1	40506877		ttataatttaaacat[A/C]atttactatttcaga	[A/C]		3.19149
929	ZMPSTE24_X5_32039G_627+18T/TG	1	40508404	rs16827109	gagtaaaatctttat[T/G]tcgttttcttttgca	[T/G]		8.51064
930	ZMPSTE24_X6.1_33738T_628-50T/TG	1	40510103	rs6677717	gtataataaagaatg[T/G]tttttctttaagaac	[T/G]		3.19149
931	ZMPSTE24_X6.1_33811C_651T/TC,D217D/D	1	40510176	rs2076697	cacaatctatgctga[T/C]tatattgccccttta	[T/C]	Asp 217 Asp	8.51064
932	ZMPSTE24_CNS3_38121C_769+4192C/CT	1	40514486	rs6676644	tgtggagatgtcaga[C/T]aggtaactgtatgta	[C/T]		8.51064
933	ZMPSTE24_X8_47984G_1059+61G/GA	1	40524349		ttagaactatggcag[G/A]catgagaggtcatat	[G/A]		1.06383
934	ZMPSTE24_X10.4_55286C_1428+723C/CT	1	40531651	rs10489431	tttatctttttttcc[C/T]acgtggtagatatga	[C/T]		9.57447
935	ZMPSTE24_X10.4_55453A_1428+890A/AG	1	40531818	rs10489432	cattttttaagcgac[A/G]taaggatgaaatact	[A/G]		9.57447
1 General nomencalture:
	Consed Report:	Gene name_Amplicon number_Amplicon type (exon <X>, CNS, IVS, Promoter <Prom>, UTR)_Genomic location (A of ATG as achoring point = +1)_Allele1/Allele2
	Mutation Surveyor Report:	Gene name_Amplicon number_Amplicon type (exon <X>, CNS, IVS, Promoter <Prom>, UTR)_Position in reference sequence-reference allele_Genomic location <coding SNPs: cDNA location-reference allele/allele1-allele2, amino acid change; intronic SNPs: closest exonic nucleotide +/- distance to that-reference allele/allele1-allele2, dbSNP number <if available>
2NCBI location in reference genome: NCBI Build 35.1
3Variants without an rs number were novel and will be submitted to dbSNP prior to publication.
4Variant site is shown in [ ] brackets.
*Consensus sequence from our sequencing data differs from reference sequence: AAAGAATAAATGA[C/T]ATTCTTGAGCATGT
