# Supplementary material for: Genetic Variation in Healthy Oldest-Old
Source: PLoS One. 2009 Aug 14;4(8):e6641. doi: 10.1371/journal.pone.0006641 (PMC2722017; doi:10.1371/journal.pone.0006641)
Supplement: Table S2 — PCR primer information (0.22 MB XLS) [file pone.0006641.s002.xls]

## Sheet: Supplemental Online Table S2
Supplemental online Table S2
PCR primers
Primer Pair No.	Gene	Amplicon name (footnote a)	Exon / CNS (footnote b)	Forward primer (footnote c)	Reverse primer (footnote d)	PCR Product Size (bp)
417	TP53	P15X2	2	TGTAAAACGACGGCCAGTttctctgcaggcccaggt	CAGGAAACAGCTATGACtcccacaggtctctgctagg	280
418	TP53	P15X3	3	TGTAAAACGACGGCCAGTagccccctagcagagacct	CAGGAAACAGCTATGACGGGGActgtagatgggtgaa	239
419	TP53	P15X4	4	TGTAAAACGACGGCCAGTCTGgtaaggacaagggttgg	CAGGAAACAGCTATGACgccaaagggtgaagaggaat	530
420	TP53	P15X5	5	TGTAAAACGACGGCCAGTgccgtcttccagttgcttta	CAGGAAACAGCTATGACACACGCAAATTTCCTTCCAC	421
421	TP53	P15X6	6	TGTAAAACGACGGCCAGTagagacgacagggctggtt	CAGGAAACAGCTATGACtggagggccactgacaac	273
422	TP53	P15X7	7	TGTAAAACGACGGCCAGTtgcttgccacaggtctcc	CAGGAAACAGCTATGACggtcagaggcaagcagag	271
423	TP53	P15X8	8	TGTAAAACGACGGCCAGTgggacaggtaggacctgatt	CAGGAAACAGCTATGACGTTGGGCAGTGctaggaaag	335
424	TP53	P15X9	9	TGTAAAACGACGGCCAGTgaccaagggtgcagttatgc	CAGGAAACAGCTATGACccccaattgcaggtaaaaca	264
425	TP53	P15X10	10	TGTAAAACGACGGCCAGTaacttgaaccatcttttaactcagg	CAGGAAACAGCTATGACggaatcctatggctttccaa	278
426	TP53	P15X11	11	TGTAAAACGACGGCCAGTgggcacagaccctctcact	CAGGAAACAGCTATGACCTCCCAAACATCCCTCACAG	432
470	TP53	A1_5'CNS1_1	5'CNS 1, amplicon 1	TGTAAAACGACGGCCAGTttccctcctcttctgggagt	CAGGAAACAGCTATGACtgctgggtagcaagtaagagc	516
471	TP53	A2_5'CNS1_2	5'CNS 2, amplicon 2	TGTAAAACGACGGCCAGTgagtcccgcggtaattctta	CAGGAAACAGCTATGACggaggaatcctgcattgtgt	507
472	TP53	A3_5'CNS1_3	5'CNS 3, amplicon 3	TGTAAAACGACGGCCAGTcagagtgataagggttgtgaagg	CAGGAAACAGCTATGACTGGacggtggctctagactt	534
473	TP53	A4_X1	Exon 1, amplicon 4	TGTAAAACGACGGCCAGTggcggattacttgcccttac	CAGGAAACAGCTATGACtctgcctaggcgttcaactt	519
474	TP53	A5_CNS4_1	CNS 4, amplicon 5	TGTAAAACGACGGCCAGTccggcctaaagcgtacttct	CAGGAAACAGCTATGACccctctcatcgggtgaatag	529
475	TP53	A6_CNS4_2	CNS 5, amplicon 6	TGTAAAACGACGGCCAGTgctgtcagtcgtggaagtga	CAGGAAACAGCTATGACgggcacaccattcaaagaag	396
476	TP53	A7_CNS5	CNS 5, amplicon 7	TGTAAAACGACGGCCAGTttttgaaagagtgcaatgatgg	CAGGAAACAGCTATGACaggtgcatgggaagaaactg	309
477	TP53	A11_CNS6	CNS 6, amplicon 11	TGTAAAACGACGGCCAGTgggattcctcttcacccttt	CAGGAAACAGCTATGACcaaacatgcgtaagcacctc	629
478	TP53	A15_CNS7_X8	CNS7 & Exon 8, amplicon 15	TGTAAAACGACGGCCAGTacccatccacctctcatcac	CAGGAAACAGCTATGACGTTGGGCAGTGctaggaaag	516
479	TP53	A18_X11_1	Exon 11, amplicon 18	TGTAAAACGACGGCCAGTaaagcattggtcagggaaaa	CAGGAAACAGCTATGACAAGTGGGCCCCTACCTAGAA	521
480	TP53	A19_X11_2	Exon 11, amplicon 19	TGTAAAACGACGGCCAGTGCACTGGTGTTTTGTTGTGG	CAGGAAACAGCTATGACGGTTGTCAGACAGGGTTTGG	495
481	TP53	A20_X11_3	Exon 11, amplicon 20	TGTAAAACGACGGCCAGTACATCTGGCCTTGAAACCAC	CAGGAAACAGCTATGACTGGTGGCATGAACCTGTG	502
482	TP53	A21_X11_4	Exon 11, amplicon 21	TGTAAAACGACGGCCAGTACTGGGTCTCGCTTTGTTGC	CAGGAAACAGCTATGACacctgctgaccccagtagc	489
483	TP53	A22_CNS8_1	3'CNS 8, amplicon 22	TGTAAAACGACGGCCAGTTGCAAGCACATCTGCATTTT	CAGGAAACAGCTATGACggctcagccttgctaaatca	498
484	TP53	A23_CNS8_2	3'CNS 9, amplicon 23	TGTAAAACGACGGCCAGTggtggctccattcataactca	CAGGAAACAGCTATGACgcaggcagtactgagctcct	505
485	TP53	A24_CNS8_3	3'CNS 10, amplicon 24	TGTAAAACGACGGCCAGTgggggcagctaaggtaagag	CAGGAAACAGCTATGACgaaggctggtggcttcatag	502
486	CRYAB	A1 (1)	CNS1 (UTR), Exon 1	TGTAAAACGACGGCCAGTggttggcaaattcgtactcg	CAGGAAACAGCTATGACgaacattaaatccaggagtgcttt	535
487	CRYAB	A2 (2)	CNS1 (UTR), Exon 1	TGTAAAACGACGGCCAGTgcctgagaggacagctgag	CAGGAAACAGCTATGACagagtcaggaatcccaagca	569
488	CRYAB	A3 (3)	CNS1 (UTR), Exon 1	TGTAAAACGACGGCCAGTtaatgtccctggggctca	CAGGAAACAGCTATGACAGGTGAGTGTGAGGGGTCAG	516
489	CRYAB	A4 (4)	CNS1 (UTR), Exon 1	TGTAAAACGACGGCCAGTtgtgtcacattgccaaatcc	CAGGAAACAGCTATGACaggcagggtaggaaaggaaa	502
490	CRYAB	A5	CNS 2	TGTAAAACGACGGCCAGTttctgggtttctcagggcta	CAGGAAACAGCTATGACttctgcagagctgctttctg	585
491	CRYAB	A6	Exon 2, CNS 3	TGTAAAACGACGGCCAGTggatgaattacccggacaga	CAGGAAACAGCTATGACcttaaatggggcatcagcat	521
492	CRYAB	A7	CNS 4, Exon 3	TGTAAAACGACGGCCAGTcatcttagctgcaaccctga	CAGGAAACAGCTATGACggagccctctaaatcataatgc	634
493	CRYAB	A8	CNS 5	TGTAAAACGACGGCCAGTgctggcagagttcaaggaat	CAGGAAACAGCTATGACtcctgaaaccatctcctgct	405
494	CRYAB	A9	CNS 6	TGTAAAACGACGGCCAGTtcctagccatgtgcttcaga	CAGGAAACAGCTATGACattctcgtgctccaacatcc	308
495	CRYAB	A10	CNS 7	TGTAAAACGACGGCCAGTcgttagcccaagaagattcc	CAGGAAACAGCTATGACtttggcaacaaaaagaatgaa	271
496	HSPB2	A11	Exon 1 (HSPB2), CNS 8	TGTAAAACGACGGCCAGTggcactattttgggtggtgt	CAGGAAACAGCTATGACcaggtatcagcactgcaagc	478
497	HSPB2	A12 (1)	CNS 9, Exon 2, 3' UTR, CNS 10	TGTAAAACGACGGCCAGTcctcccttacctttccgttc	CAGGAAACAGCTATGACATCAGCAGGCAGGACATAGG	519
498	HSPB2	A13 (2)	CNS 9, Exon 2, 3' UTR, CNS 10	TGTAAAACGACGGCCAGTTGAGCCACTTTACCCCAGAC	CAGGAAACAGCTATGACTGGGACCAAACCATACATTG	482
499	HSPB2	A14 (3)	CNS 9, Exon 2, 3' UTR, CNS 10	TGTAAAACGACGGCCAGTAGGAGGAGGCAGCCATAGTT	CAGGAAACAGCTATGACtggatggcatatcccttttc	513
500	HSPB2	A15 (4)	CNS 9, Exon 2, 3' UTR, CNS 10	TGTAAAACGACGGCCAGTtgatgtgcccaacgtcatag	CAGGAAACAGCTATGACtttgtgtctgtgccctgtgt	419
501	SCD	A1	CNS 1	TGTAAAACGACGGCCAGTggggtcagaccacgtacaga	CAGGAAACAGCTATGACccctgggaagaggagaaaat	326
502	SCD	A2 (1)	CNS 2, Exon 1	TGTAAAACGACGGCCAGTgggttcaccactgtttcctg	CAGGAAACAGCTATGACAGCCGGGAATTTAAAGGCTA	623
503	SCD	A3 (2)	CNS 2, Exon 1	TGTAAAACGACGGCCAGTgtggtGTGGTGTCGGTGTC	CAGGAAACAGCTATGACccctctcttctgccacca	533
504	SCD	A4	CNS 3, Exon 2	TGTAAAACGACGGCCAGTctccgcccctaatgtatctg	CAGGAAACAGCTATGACgggctggtgtcctctgtaag	604
505	SCD	A5	CNS 4	TGTAAAACGACGGCCAGTtgagatgcaggactgtcaatg	CAGGAAACAGCTATGACgagctctctcctccctttcc	333
506	SCD	A6	Exon 3	TGTAAAACGACGGCCAGTtcctttcccagatggaact	CAGGAAACAGCTATGACtctgtccccggatcatta	285
507	SCD	A7	Exon 4	TGTAAAACGACGGCCAGTtgggctcttgatacctgtcc	CAGGAAACAGCTATGACcccagcaaatttctcagctt	424
508	SCD	A8	Exon 5	TGTAAAACGACGGCCAGTtggaagaaagacagcccatc	CAGGAAACAGCTATGACtctggctcctagcctaatcc	435
509	SCD	A9	CNS 6	TGTAAAACGACGGCCAGTtctgggtggccatgagtt	CAGGAAACAGCTATGACctgggctgtgtgtaagcact	406
510	SCD	A10 (1)	CNS 7, Exon 6. CNS 8	TGTAAAACGACGGCCAGTgcgcagtgactcatgactgt	CAGGAAACAGCTATGACGACCCCAAACTCAGCCACT	525
511	SCD	A11 (2)	CNS 7, Exon 6. CNS 8	TGTAAAACGACGGCCAGTGGCACATCAACTTCACCACA	CAGGAAACAGCTATGACTAGGCTTTGGAAGCTGGACA	500
512	SCD	A12 (3)	CNS 7, Exon 6. CNS 8	TGTAAAACGACGGCCAGTAAGCCAACAACTCTGCCTTT	CAGGAAACAGCTATGACGGGGCTTGAAGTCCTCATTA	535
513	SCD	A13 (4)	CNS 7, Exon 6. CNS 8	TGTAAAACGACGGCCAGTTTCTGGGTAGTCCCCTGTTG	CAGGAAACAGCTATGACGCAGAAAGAGGAAAGAACTGTAATG	558
514	SCD	A14 (5)	CNS 7, Exon 6. CNS 8	TGTAAAACGACGGCCAGTAGTGGTCTCTGCTGGGGAAG	CAGGAAACAGCTATGACTCCCTTCCTATGTGAAGTTCG	530
515	SCD	A15 (6)	CNS 7, Exon 6. CNS 8	TGTAAAACGACGGCCAGTCTATTAGAGTATTTCCCTTCCAAAGA	CAGGAAACAGCTATGACCAGGGTAGAGCCAGGAATCA	486
516	SCD	A16 (7)	CNS 7, Exon 6. CNS 8	TGTAAAACGACGGCCAGTGTTGTGCCCCTTCACTCATT	CAGGAAACAGCTATGACCCCACTGGCTCAACATGA	534
517	SCD	A17 (8)	CNS 7, Exon 6. CNS 8	TGTAAAACGACGGCCAGTAGCTAGCTGCCACTTTCACG	CAGGAAACAGCTATGACCTCAAATCCCAGGTCTCAGC	494
518	SCD	A18 (9)	CNS 7, Exon 6. CNS 8	TGTAAAACGACGGCCAGTAATGCCCCCTGCTTACTTG	CAGGAAACAGCTATGACTTAGTCCAGGCTAACCCCTGT	534
519	SCD	A19 (10)	CNS 7, Exon 6. CNS 8	TGTAAAACGACGGCCAGTGGACCACTCCTGTCCCTGTA	CAGGAAACAGCTATGACTCGTGTTCCTTACTCAGCAGAC	533
520	SCD	A20 (11)	CNS 7, Exon 6. CNS 8	TGTAAAACGACGGCCAGTGTCATCAGATGCCTGCTTGA	CAGGAAACAGCTATGACGCAGCCCTAACAAAAGTTTCC	534
521	SCD	A21 (12)	CNS 7, Exon 6. CNS 8	TGTAAAACGACGGCCAGTTCACTCCCTCTGCAGAATCC	CAGGAAACAGCTATGACTGCCCTTTGAGGTAGGTCAG	532
522	SCD	A22 (13)	CNS 7, Exon 6. CNS 8	TGTAAAACGACGGCCAGTTGGTTTGCTAGTATCTTGGGTGT	CAGGAAACAGCTATGACTGGCAATGCGTTGTTTATGT	502
523	SCD	A23 (14)	CNS 7, Exon 6. CNS 8	TGTAAAACGACGGCCAGTGTGTGTCCCAGATGCTGTCA	CAGGAAACAGCTATGACttcctgcgtcccagagttta	521
524	SCD	A24 (15)	CNS 7, Exon 6. CNS 8	TGTAAAACGACGGCCAGTCACTGggtctgggagtttct	CAGGAAACAGCTATGACccaagaggcagaatttgcag	453
569	SCD	A 1.1 (1)	CNS 2 (1kb promoter)	TGTAAAACGACGGCCAGTcacagggacagatcagtaggg	CAGGAAACAGCTATGACcctgcgaacaatggctct	624
570	SCD	A 1.2 (2)	CNS 2 (1kb promoter)	TGTAAAACGACGGCCAGTcaacctgccagtctgaagaa	CAGGAAACAGCTATGACccctcccctctgtttctcct	603
704	IGF1R	promo 1	IGF1R 2kb upstr	TGTAAAACGACGGCCAGTAAAACAACCGCGGAGACTTA	CAGGAAACAGCTATGACCAGAGTGGCTCGAGGAGAGA	618
705	IGF1R	promo 2	IGF1R 2kb upstr	TGTAAAACGACGGCCAGTGGGCCCCCACATTTCCTC	CAGGAAACAGCTATGACgcccgactccaaaaacaat	670
707	IGF1R	promo 4	IGF1R 2kb upstr	TGTAAAACGACGGCCAGTccgcacgtcttggggaac	CAGGAAACAGCTATGACgggcagaaacgcggagtc	732
708	IGF1R	promo 5	IGF1R 2kb upstr	TGTAAAACGACGGCCAGTgctttgtgtgtgtcctggat	CAGGAAACAGCTATGACctccccctccaaaaacaag	557
957	IGF1R	706.2 redesign	promo 3_IGF1R 2kb upstr	TGTAAAACGACGGCCAGTAAACAAtgaagcttttcaagaacc	CAGGAAACAGCTATGACctctctcgagttcgcctggt	673
1105	IGF1R	689F.2	Prom covering 689/707 region	TGTAAAACGACGGCCAGTaccaggcgaactcgagagag	CAGGAAACAGCTATGACctaggcgaggaaaaacaagc	604
1106	IGF1R	689F.3	Prom covering 689/707 region	TGTAAAACGACGGCCAGTaccaggcgaactcgagagag	CAGGAAACAGCTATGACgcagaaacgcggagtcaa	471
525	IGF1R	A1	CNS 1, Promoter	TGTAAAACGACGGCCAGTtctgcctctccagctaaatg	CAGGAAACAGCTATGACtgagttttatcatttgaagagaatgg	427
526.3/689	IGF1R	A2 (1)	CNS 2, Exon 1	TGTAAAACGACGGCCAGTtttcaagaaccggggaaac	CAGGAAACAGCTATGACtcagcggagttaatgctggt	599
527.3/690	IGF1R	A3 (2)	CNS 2, Exon 2	TGTAAAACGACGGCCAGTgcgcgtgtctctgtgtgc	CAGGAAACAGCTATGACggctcgctgaaggtcaca	561
691/689.1	IGF1R	new A3 (2.2)	CNS 2, Promoter, Exon 1	TGTAAAACGACGGCCAGTaccaggcgaactcgagagag	CAGGAAACAGCTATGACcaaagcccaaatctgccta	620
528	IGF1R	A4 (3)	CNS 2, Exon 1	TGTAAAACGACGGCCAGTttgactccgcgtttctgc	CAGGAAACAGCTATGACTGAAATTCCCCTTTCTCAAAA	535
529	IGF1R	A5 (4)	CNS 2, Exon 1	TGTAAAACGACGGCCAGTaaaatggaggccgacgac	CAGGAAACAGCTATGACgggctccagacgaacgag	629
530	IGF1R	A6 (1)	Exon 2	TGTAAAACGACGGCCAGTaggattcctgaaaaccaactg	CAGGAAACAGCTATGACTATTGGACACCGCATCCAG	534
531	IGF1R	A7 (2)	Exon 2	TGTAAAACGACGGCCAGTGCGGCTGGAAACTCTTCTAC	CAGGAAACAGCTATGACagaagggaggtcaaggagga	427
532	IGF1R	A8	CNS 3	TGTAAAACGACGGCCAGTtgcatccatttcattgatgtat	CAGGAAACAGCTATGACagccttatccatgtctcacca	414
533	IGF1R	A9	CNS 4	TGTAAAACGACGGCCAGTtcatggcctcacttgttattt	CAGGAAACAGCTATGACcaggtggcaccatgaacg	324
534	IGF1R	A10	CNS 5	TGTAAAACGACGGCCAGTagactgtgtcattgcactcca	CAGGAAACAGCTATGACcagtctggcctccttctcct	417
535	IGF1R	A11	CNS 6	TGTAAAACGACGGCCAGTaagccactgttgtttcagagc	CAGGAAACAGCTATGACaaattgagcgtgcttcagga	332
536	IGF1R	A12	CNS 7	TGTAAAACGACGGCCAGTtgttttcctgaaagcaaaatga	CAGGAAACAGCTATGACcttggaaccttaaatcttcttcc	285
537	IGF1R	A13	CNS 8	TGTAAAACGACGGCCAGTtcttgtcaagcagtatattttcacg	CAGGAAACAGCTATGACcatggttctcttatcccaacg	549
538	IGF1R	A14	CNS 9	TGTAAAACGACGGCCAGTctccgaataacacgccaatc	CAGGAAACAGCTATGACattccccgactctgcactct	350
539	IGF1R	A15	CNS 10	TGTAAAACGACGGCCAGTttccacgatgggtcttgaat	CAGGAAACAGCTATGACcttcctgcttggagcctgt	334
540	IGF1R	A16	CNS 11	TGTAAAACGACGGCCAGTagtgacatttgcagccacag	CAGGAAACAGCTATGACttttgcaactcttccccagt	632
541	IGF1R	A17	CNS 12	TGTAAAACGACGGCCAGTaagagggtcccttcctttcc	CAGGAAACAGCTATGACccctcactgaagcacaacct	332
542	IGF1R	A18	Exon 3	TGTAAAACGACGGCCAGTaatgacccagaaggatgctg	CAGGAAACAGCTATGACcggatgaaacaaccgacag	526
543	IGF1R	A19	Exon 4	TGTAAAACGACGGCCAGTtttttaatgcaagaagacagactc	CAGGAAACAGCTATGACgggagcatgaaaagcatcaa	320
544	IGF1R	A20	Exon 5	TGTAAAACGACGGCCAGTgaatccaagtatgtcacccttaca	CAGGAAACAGCTATGACagggagggctcttacctcag	334
545	IGF1R	A21	Exon 6	TGTAAAACGACGGCCAGTagcaggctagaggggactgt	CAGGAAACAGCTATGACctagtggtcccccatgtgaa	433
546	IGF1R	A22	Exon 7	TGTAAAACGACGGCCAGTcaagacaggtgcttttcagaga	CAGGAAACAGCTATGACtggcctctcccattcgtag	285
547	IGF1R	A23	Exon 8	TGTAAAACGACGGCCAGTcctctggggaagatttttga	CAGGAAACAGCTATGACctggtacaagcaaggccagt	414
548	IGF1R	A24	Exon 9	TGTAAAACGACGGCCAGTctgttggcttgccagagtatc	CAGGAAACAGCTATGACgctcaggcacattacaacca	353
549	IGF1R	A25	Exon 10	TGTAAAACGACGGCCAGTgccgagaccagctatcttctt	CAGGAAACAGCTATGACcactacctggtggggagaaa	434
550	IGF1R	A26	Exon 11	TGTAAAACGACGGCCAGTggggctcaatagctccttct	CAGGAAACAGCTATGACtgggtgtcagaccctgtgt	525
551	IGF1R	A27	Exon 12	TGTAAAACGACGGCCAGTtctcaggtcagcccagtgtt	CAGGAAACAGCTATGACacctgtgcagtcaggtagca	322
552	IGF1R	A28	Exon 13	TGTAAAACGACGGCCAGTcaggccccagatttctcc	CAGGAAACAGCTATGACcatgaacactcgggctgtc	334
553	IGF1R	A29	Exon 14	TGTAAAACGACGGCCAGTtgtgaagaaatgaaatgagcaa	CAGGAAACAGCTATGACcaccttcactcacattcaaatca	277
554	IGF1R	A30	Exon 15	TGTAAAACGACGGCCAGTtctgataccgtgtgagagagga	CAGGAAACAGCTATGACtcctgaaagctcccgatcta	279
555	IGF1R	A31	Exon 16	TGTAAAACGACGGCCAGTggcttagagttcccccaaag	CAGGAAACAGCTATGACtgcagccaagaacatactgg	423
981/556.2	IGF1R	A32/556.2	Exon 17	TGTAAAACGACGGCCAGTgcaccacagagacagttcca	CAGGAAACAGCTATGACgacacagcatttccttgcag	316
557	IGF1R	A33	Exon 18	TGTAAAACGACGGCCAGTctcgaaagaaattggcatgg	CAGGAAACAGCTATGACtgccaacaaagtcctcaaaa	330
558	IGF1R	A34	Exon 19	TGTAAAACGACGGCCAGTtgtagggtcctctgctgtga	CAGGAAACAGCTATGACactgagctggtggaaagtgc	304
559	IGF1R	A35	Exon 20	TGTAAAACGACGGCCAGTgctcgggatgtaagaagtgc	CAGGAAACAGCTATGACtcctgtgacccaagaaaaca	332
560	IGF1R	A36 (1)	Exon 21	TGTAAAACGACGGCCAGTcttgtatgcgggaaaccact	CAGGAAACAGCTATGACAAGGATCAGCAGGTCGAAGA	517
561	IGF1R	A37 (2)	Exon 21	TGTAAAACGACGGCCAGTCCGACAGACACTCAGGACAC	CAGGAAACAGCTATGACAAAGGGAGAACAGGGAAGGA	518
562	IGF1R	A38 (3)	Exon 21	TGTAAAACGACGGCCAGTCACATTTGGGATGTTCCTTTT	CAGGAAACAGCTATGACGCCGATGAGGGAGAAAGTT	492
563	IGF1R	A39 (4)	Exon 21	TGTAAAACGACGGCCAGTCACCGTGGGTCATTACAAAA	CAGGAAACAGCTATGACcccttgactccaagcctgt	518
564	IGF1R	A40	CNS 13	TGTAAAACGACGGCCAGTgactcagccccactgttgat	CAGGAAACAGCTATGACaccgggaaaagaggaagaaa	431
565	IGF1R	A41	CNS 14	TGTAAAACGACGGCCAGTttctggggcatgactttagc	CAGGAAACAGCTATGACgggtcagggagaaatcctttt	435
566	IGF1R	A42	CNS 15	TGTAAAACGACGGCCAGTcctctgggtatccctttgtct	CAGGAAACAGCTATGACtccctgccaccaaagtgtag	521
567	IGF1R	A43	CNS 16	TGTAAAACGACGGCCAGTtctcagcagccacagaagaa	CAGGAAACAGCTATGACggtctgaggagcaggaacag	273
568	IGF1R	A44	CNS 17	TGTAAAACGACGGCCAGTccatcacgtatccctgaagat	CAGGAAACAGCTATGACctttggcctaaggcatctgt	533
571	APOB	A1	CNS 1	TGTAAAACGACGGCCAGTccttaaagtaagcaacttcaaatca	CAGGAAACAGCTATGACcatatgcttgagccctaccc	617
572.2	APOB	A2	CNS 2	TGTAAAACGACGGCCAGTgagatggtaattgtcaccagagc	CAGGAAACAGCTATGACtcaaaaccccagagttggag	413
573	APOB	A3	CNS 3	TGTAAAACGACGGCCAGTacacagtcccccggaaag	CAGGAAACAGCTATGACaaaggcctgcctaaccatct	425
574	APOB	A4	CNS 4	TGTAAAACGACGGCCAGTtctggcctgtcactatgcac	CAGGAAACAGCTATGACtttacccctgacccagacag	329
575	APOB	A5	CNS 5	TGTAAAACGACGGCCAGTaatgtgccatttctttcctga	CAGGAAACAGCTATGACtgaatgaatgaatctgcacca	429
576	APOB	A6 (1)	CNS 6	TGTAAAACGACGGCCAGTttgctcactagcggtttcct	CAGGAAACAGCTATGACtcccagcaggagtccaagta	535
577	APOB	A7 (2)	CNS 6	TGTAAAACGACGGCCAGTaacatgacgtgtcctgtcca	CAGGAAACAGCTATGACggtgccttcttcagatgacc	530
578	APOB	A8 (3)	CNS 6	TGTAAAACGACGGCCAGTatccaaggtccaccaaaatg	CAGGAAACAGCTATGACAACCGAGAAGGGCACTCAG	527
579	APOB	A9 (4)	CNS 6, EXON 1 (5'UTR)	TGTAAAACGACGGCCAGTgaggctcttcaaggctcaaa	CAGGAAACAGCTATGACactcgccctggaccctgt	504
580	APOB	A10	EXON 2	TGTAAAACGACGGCCAGTctccctcctgaaaggtgaaa	CAGGAAACAGCTATGACacccgggtgtaggagagtg	243
581	APOB	A11	CNS 7	TGTAAAACGACGGCCAGTcctggccttctgttctgtcc	CAGGAAACAGCTATGACgtgctgccccatcagaagt	324
582.2	APOB	A12	EXON 3	TGTAAAACGACGGCCAGTcccagaattggctgtcctt	CAGGAAACAGCTATGACctgcgtttgctcagtacaca	330
583.2	APOB	A13	EXON 4	TGTAAAACGACGGCCAGTaggggccacctctcattct	CAGGAAACAGCTATGACgtgcctggtgcaaacacac	317
584	APOB	A14	EXON 5	TGTAAAACGACGGCCAGTacccagcttacttccagcaa	CAGGAAACAGCTATGACggactggtctctaacacatgaaga	323
585	APOB	A15	EXON 6	TGTAAAACGACGGCCAGTtcccaagtacccaaggatgt	CAGGAAACAGCTATGACcccactagctcaaaagttctgg	335
586	APOB	A16	EXON 7	TGTAAAACGACGGCCAGTcctgctcccttctaccttga	CAGGAAACAGCTATGACacaggtttgcctggaacaga	335
587	APOB	A17	EXON 8	TGTAAAACGACGGCCAGTgggaaaaccttcaacatgga	CAGGAAACAGCTATGACttaacagggctcagcaagtg	278
588	APOB	A18	EXON 9	TGTAAAACGACGGCCAGTccttttcccctgtgctgata	CAGGAAACAGCTATGACtttggccaaggtttgaaagt	431
589	APOB	A19	EXON 10	TGTAAAACGACGGCCAGTagaggacacaccatgagcaa	CAGGAAACAGCTATGACagtggaaggaggggttcagt	433
590	APOB	A20	EXON 11 & EXON 12	TGTAAAACGACGGCCAGTtgcttcagctattcaggctct	CAGGAAACAGCTATGACcccctagtaccttccaaatcc	610
591	APOB	A21	EXON 13	TGTAAAACGACGGCCAGTagtgtttgccaggcatgttc	CAGGAAACAGCTATGACcagtggctatgccaaaacct	396
592	APOB	A22	EXON 14	TGTAAAACGACGGCCAGTacttggggtgcaagagtcaa	CAGGAAACAGCTATGACtttcctctgggtagctcctg	432
593	APOB	A23	EXON 15	TGTAAAACGACGGCCAGTggacatcaagagtggggact	CAGGAAACAGCTATGACcccagcaggtctggttgata	431
594.2	APOB	A24	EXON 16	TGTAAAACGACGGCCAGTccacattgggaactgaaagg	CAGGAAACAGCTATGACtgggatcgtaagggagtctg	379
595	APOB	A25	EXON 17	TGTAAAACGACGGCCAGTgaggttgtaattaacaaaaccgactt	CAGGAAACAGCTATGACaagaaatgcaccctggaaga	334
596.2	APOB	A26	EXON 18	TGTAAAACGACGGCCAGTtctgactgacaggggactga	CAGGAAACAGCTATGACctggcaaaattctgcaggta	382
597	APOB	A27	EXON 19	TGTAAAACGACGGCCAGTgggtatttgcaccctgagaa	CAGGAAACAGCTATGACagatggtgcaaacccagaag	427
598	APOB	A28	EXON 20	TGTAAAACGACGGCCAGTggaacataatcaccatccttgaa	CAGGAAACAGCTATGACtcctcatgaattctgaacctga	285
599	APOB	A29	EXON 21	TGTAAAACGACGGCCAGTacccggcccaaaacatag	CAGGAAACAGCTATGACctaggggagaacatggcttg	410
600	APOB	A30	EXON 22, EXON 23	TGTAAAACGACGGCCAGTaatcctgcatatctccattgaa	CAGGAAACAGCTATGACcctgcacctagctcagagttg	648
601	APOB	A31	EXON 24	TGTAAAACGACGGCCAGTcggtatttttgcctaatgttca	CAGGAAACAGCTATGACtcatgctatgtaaaatctttcatttac	327
602	APOB	A32	EXON 25	TGTAAAACGACGGCCAGTttgtgaaggtcagaggcaga	CAGGAAACAGCTATGACgaaagccaaagtcctttcctc	579
603	APOB	A33 (1)	EXON 26	TGTAAAACGACGGCCAGTacaattggcccagaaaaatg	CAGGAAACAGCTATGACTATCTGGTTGGTGCCTTGGA	527
604	APOB	A34 (2)	EXON 26	TGTAAAACGACGGCCAGTCAAGATTGATGGGCAGTTCA	CAGGAAACAGCTATGACTCCTTAGTGTCGCCTTGTGA	523
605	APOB	A35 (3)	EXON 26	TGTAAAACGACGGCCAGTTCTAAGCAAAATGCACTGCTG	CAGGAAACAGCTATGACCCCATCATGTCATTTGAGAGC	493
606	APOB	A36 (4)	EXON 26	TGTAAAACGACGGCCAGTTCAGGGAACACAATGCAAAA	CAGGAAACAGCTATGACTTGCTGATAAGGCAGCAGAA	515
607	APOB	A37 (5)	EXON 26	TGTAAAACGACGGCCAGTCAGCTACAGCCCTATTCTCTGG	CAGGAAACAGCTATGACGATGACTTGTGGAGCCTTTG	534
608	APOB	A38 (6)	EXON 26	TGTAAAACGACGGCCAGTTTCTGTAATGGCCCCGTTTA	CAGGAAACAGCTATGACAAATTCTTGGGGCTTCTCAA	501
609	APOB	A39 (7)	EXON 26	TGTAAAACGACGGCCAGTAATTGGCGTGGAGCTTACTG	CAGGAAACAGCTATGACTTGGCATCATCTAATGCAATTT	515
610	APOB	A40 (8)	EXON 26	TGTAAAACGACGGCCAGTGAGAAACCTGAAGCACATCAAT	CAGGAAACAGCTATGACGTATCTGGATTCTGATTTGGTACTTA	535
611.2	APOB	A41 (9)	EXON 26	TGTAAAACGACGGCCAGTGAAAAATTAAAAAGTCTTGATGAGCA	CAGGAAACAGCTATGACGTCTCCTTCAACTTGTATTGGTG	535
612	APOB	A42 (10)	EXON 26	TGTAAAACGACGGCCAGTCTTGAGCATGTCAAACACTTTGT	CAGGAAACAGCTATGACTGGCCTTGGTTTCCTCTAAA	522
613	APOB	A43 (11)	EXON 26	TGTAAAACGACGGCCAGTTGTTAACAAATTCCTTGACATGTTG	CAGGAAACAGCTATGACCGTTTAGCCCAATCTTGGAT	518
614	APOB	A44 (12)	EXON 26	TGTAAAACGACGGCCAGTGACCGAATGTATCAAATGGACA	CAGGAAACAGCTATGACGCAGCTCACTGTTCAGCATC	528
615	APOB	A45 (13)	EXON 26	TGTAAAACGACGGCCAGTCCCCCTAACAGATTTGAGGA	CAGGAAACAGCTATGACGTTTGCTGAGGTGGTTCCAT	534
616	APOB	A46 (14)	EXON 26	TGTAAAACGACGGCCAGTTCCCAACTCTCAACCTTAATGA	CAGGAAACAGCTATGACTGCTATCCAGGGTAAGCTGATT	524
617	APOB	A47 (15)	EXON 26	TGTAAAACGACGGCCAGTGATTAATCCGCTGGCTCTGA	CAGGAAACAGCTATGACAGTTGAGGGAGCCAGATTCA	529
618	APOB	A48 (16)	EXON 26	TGTAAAACGACGGCCAGTCTGGAAAAGGGTCATGGAAA	CAGGAAACAGCTATGACTTACTTGCCAACTTGCTTGC	533
619	APOB	A49 (17)	EXON 26	TGTAAAACGACGGCCAGTCTTTTCAGCCCAGCCATTT	CAGGAAACAGCTATGACAGCCAAAGGATTTGTGATGG	495
620	APOB	A50 (18)	EXON 26	TGTAAAACGACGGCCAGTTTCCTGAAATGCGTCTACCTT	CAGGAAACAGCTATGACCACACGGACGTCAGAACCTA	517
621	APOB	A51 (19)	EXON 26	TGTAAAACGACGGCCAGTCTCCCCAGGACCTTTCAAAT	CAGGAAACAGCTATGACTGGCTAACTTCAATCCCCTTT	501
622	APOB	A52 (20)	EXON 26	TGTAAAACGACGGCCAGTCATCACACTGAATACCAATGCTG	CAGGAAACAGCTATGACAAAGAACCGAACCCTTGACA	511
623.2	APOB	A53 (21)	EXON 26	TGTAAAACGACGGCCAGTAAAACCTACTGTCTCTTCCTCCAT	CAGGAAACAGCTATGACTGCATGGACCTGAACAAGAG	498
624	APOB	A54 (22)	EXON 26	TGTAAAACGACGGCCAGTATTTTGCTGGAGAAGCCACA	CAGGAAACAGCTATGACCAAAGGCAGTTGAAACACGA	515
625	APOB	A55 (23)	EXON 26	TGTAAAACGACGGCCAGTCCAAGAAAAGGCACACCTTG	CAGGAAACAGCTATGACTCAGGCACGGTTATCTCAAA	527
626	APOB	A56 (24)	EXON 26	TGTAAAACGACGGCCAGTGTTCCATCGTGCAAACTTGA	CAGGAAACAGCTATGACGTACGGTTGAGCTGCATGTG	528
627	APOB	A57 (25)	EXON 26	TGTAAAACGACGGCCAGTTGCAGTAGCCAACAAGATCG	CAGGAAACAGCTATGACttttgtgacattgagtaattgtacatc	414
628	APOB	A58	Exon 27 & Exon 28	TGTAAAACGACGGCCAGTttctcccagttttcacaatga	CAGGAAACAGCTATGACgtatctgccccaattctcca	580
629	APOB	A59 (1)	CNS 8 & EXON 29	TGTAAAACGACGGCCAGTccccactcctcttccagttt	CAGGAAACAGCTATGACAATCATAAAGGACCCCTGTGG	501
630	APOB	A60 (2)	CNS 8 & EXON 29	TGTAAAACGACGGCCAGTAAAACTCACCATATTCAAAACTGAG	CAGGAAACAGCTATGACTGGGGAAGTTCAGAAAATCAA	535
631	APOB	A61 (3)	EXON 29	TGTAAAACGACGGCCAGTCTGGGACCTACCAAGAGTGG	CAGGAAACAGCTATGACGCACCTCTGTGGTCTTGAGAG	509
632	APOB	A62 (4)	EXON 29	TGTAAAACGACGGCCAGTCGAAAGTCCATAATGGTTCAGA	CAGGAAACAGCTATGACTTTCACTGTCCAGCCAACTAT	535
633	APOB	A63 (5)	EXON 29	TGTAAAACGACGGCCAGTTCCAAGATGAGATCAACACAATC	CAGGAAACAGCTATGACAAACTGCTGGTGGTAATCAGAAA	535
634	APOB	A64 (6)	EXON 29	TGTAAAACGACGGCCAGTTTCTGCACAGAAATATTCAGGA	CAGGAAACAGCTATGACAGGCTGGCTCACTGTATGGT	508
635	APOB	A65 (7)	EXON 29 (3'UTR)	TGTAAAACGACGGCCAGTCCCCTACATGAAGCTTGCTC	CAGGAAACAGCTATGACaggttttgctgtgccagaac	459
636	APOB	A66	CNS 9	TGTAAAACGACGGCCAGTtggaaatgtgggctagagaaa	CAGGAAACAGCTATGACatcctgaggacagcaccact	427
637	APOB	A67	CNS 10	TGTAAAACGACGGCCAGTccgcctagagtagtggtgct	CAGGAAACAGCTATGACtggcattgttgacttgaagc	634
638	APOB	A68	CNS 11	TGTAAAACGACGGCCAGTagggctgtgtcccgagtct	CAGGAAACAGCTATGACacccgtctcttttggggtag	428
639	APOB	A69 (1)	CNS 12	TGTAAAACGACGGCCAGTcttcatgggctccttcctc	CAGGAAACAGCTATGACgcaggaagccactcaaacat	492
640	APOB	A70 (2)	CNS 12	TGTAAAACGACGGCCAGTcttagccctcccctcaaact	CAGGAAACAGCTATGACtcccgctctctgtttcattc	501
641	APOB	A71	CNS 13	TGTAAAACGACGGCCAGTtgtgcccatcctagaacaaa	CAGGAAACAGCTATGACaagttgtggcttggttgcat	428
642	APOB	A72	CNS 14	TGTAAAACGACGGCCAGTgatgaccaccccctgactta	CAGGAAACAGCTATGACcctcggagagtcccatttct	390
643	APOB	A73	CNS 15	TGTAAAACGACGGCCAGTcaaatttatttcaaaacttcctcaa	CAGGAAACAGCTATGACttccatgtggtctgtcatcc	535
644	APOB	A74 (1)	CNS 16	TGTAAAACGACGGCCAGTtcaggaaatcttggctctcg	CAGGAAACAGCTATGACttctctgttcgggcagtatg	499
645	APOB	A75 (2)	CNS 16	TGTAAAACGACGGCCAGTtgcaaattacagcatttggag	CAGGAAACAGCTATGACggccttgtgctggactctt	601
709	NOTCH1	A1	CNS 1	TGTAAAACGACGGCCAGTCCAGTGAAATGCTGATCGTG	CAGGAAACAGCTATGACAGGCGAGAGTTTCTCAGGTG	568
710	NOTCH1	A2	CNS 2	TGTAAAACGACGGCCAGTACCGAGAAAGGGGGAAGG	CAGGAAACAGCTATGACCAGGCCTGCCCAAATCAG	535
711	NOTCH1	A3	CNS 3.1 prom	TGTAAAACGACGGCCAGTTTAACCAGGCTTGGCACAG	CAGGAAACAGCTATGACGCATGTGAATAAGCGGAGGA	616
712	NOTCH1	A4	CNS 3.2 prom	TGTAAAACGACGGCCAGTATCCTCTGGACGCCTAAAGC	CAGGAAACAGCTATGACGTGAGGCTCAGAGTCGAGGT	584
1117	NOTCH1	A5	Prom Exon 1	TGTAAAACGACGGCCAGTCCTCTGAAAACTTTCAAACGAGA	CAGGAAACAGCTATGACGCTTTTCCCTCTCCATGCT	722
1087	NOTCH1	A6	CNS 3.4 prom/X1	TGTAAAACGACGGCCAGTGCTCAAACTTTTGGCCTCTG	CAGGAAACAGCTATGACAAGGTCGGTCCTCCCTGAT	790
715	NOTCH1	A7	CNS 4	TGTAAAACGACGGCCAGTTTGGAGGCGAGAATTATCTGT	CAGGAAACAGCTATGACGGTGGCCACACTCAGCTC	434
716	NOTCH1	A8	EXON 2/CNS 5	TGTAAAACGACGGCCAGTAGAGTGCGTCCGGGGTAG	CAGGAAACAGCTATGACCCCTGGCAGATCAACTGTTT	562
717	NOTCH1	A9	CNS 6	TGTAAAACGACGGCCAGTCTGGTCTGCCAGCCTCAGAT	CAGGAAACAGCTATGACAACAATAGCTGCTGCACTTCC	630
718	NOTCH1	A10	CNS 7	TGTAAAACGACGGCCAGTTGTGCCAGTGCAGTTTTCAT	CAGGAAACAGCTATGACGAGCCAGCCCTGCTTCAC	329
719	NOTCH1	A11	CNS 8	TGTAAAACGACGGCCAGTATCTCCACGGGCCTTCTGT	CAGGAAACAGCTATGACGAAGGAGGAAAGGGGCAGT	491
720	NOTCH1	A12	CNS 9	TGTAAAACGACGGCCAGTGTCCAGCTGACCCCACAC	CAGGAAACAGCTATGACGGGGTAACCTGTCCTATCTGG	517
721	NOTCH1	A13	CNS 10	TGTAAAACGACGGCCAGTGTGCACTCCACGGGTTCC	CAGGAAACAGCTATGACCCTCCAGATGGGATGTACAGAG	735
722	NOTCH1	A14	EXON 3	TGTAAAACGACGGCCAGTCTGTGCCCATGACAGGTTC	CAGGAAACAGCTATGACCCAATTACTTCCGGGTCAGA	503
723	NOTCH1	A15	EXON 4	TGTAAAACGACGGCCAGTGGATCAAATGTGATAGCACCTAA	CAGGAAACAGCTATGACATCCCGCCTTCCCAACTC	627
724	NOTCH1	A16	CNS 11	TGTAAAACGACGGCCAGTGGTCTGGTTTTGGGTGCTC	CAGGAAACAGCTATGACTTCTGTCACAAAAACCCTTGG	679
725	NOTCH1	A17	EXON 5	TGTAAAACGACGGCCAGTGTGTCCAGAGCAGTGTGTCG	CAGGAAACAGCTATGACGTCTTGCCTCCTCTTTGTGC	691
726	NOTCH1	A18	EXON 6	TGTAAAACGACGGCCAGTGTGGGTGGAGGAGTCAGC	CAGGAAACAGCTATGACACTGACACCCCAGGAGGAG	613
727	NOTCH1	A19	EXON 7	TGTAAAACGACGGCCAGTCTCCTCCTGGGGTGTCAGT	CAGGAAACAGCTATGACGTCCCATCCCCCATCTAACT	399
728	NOTCH1	A20	EXON 8	TGTAAAACGACGGCCAGTCCAGTTAGATGGGGGATGG	CAGGAAACAGCTATGACACCCTCATCTGCCTAGCACT	532
729	NOTCH1	A21	EXON 9	TGTAAAACGACGGCCAGTGTGGTGGCTGGGACACTG	CAGGAAACAGCTATGACTCGGGGAAGTCTGAAAACAC	709
730	NOTCH1	A22	EXON 10	TGTAAAACGACGGCCAGTGCTCCACTGTAGCCATAGCA	CAGGAAACAGCTATGACGACCAAGGTGTCCATGACCT	500
731	NOTCH1	A23	EXON 11/Exon 12	TGTAAAACGACGGCCAGTCAGGTCTGGTCATGGGTGTC	CAGGAAACAGCTATGACGAGTGGCTGACCTTGACCTC	595
732	NOTCH1	A24	EXON 13	TGTAAAACGACGGCCAGTGACAGGGAAATCGAGGTTGA	CAGGAAACAGCTATGACAAACACTTGCGGCTGTTACC	595
733	NOTCH1	A25	EXON 14/EXON 15	TGTAAAACGACGGCCAGTCCATAGGGCATTGCAGACC	CAGGAAACAGCTATGACCTCCGCCCTCTCCAGCAC	718
734	NOTCH1	A26	CNS 12	TGTAAAACGACGGCCAGTTCCCTTTCAGACACGTCGAT	CAGGAAACAGCTATGACGAGACCGAGGCCTGAAACTA	513
735	NOTCH1	A27	EXON 16	TGTAAAACGACGGCCAGTCCATCTGTGCTCCACTCCT	CAGGAAACAGCTATGACAGAACGCACTCGTTGATGTC	731
736	NOTCH1	A28	EXON 17	TGTAAAACGACGGCCAGTATTAGGGGAGAGGGGATGG	CAGGAAACAGCTATGACCTTCTGCCAACCTCAACCTC	694
737	NOTCH1	A29	EXON 18	TGTAAAACGACGGCCAGTCTTTGTCACAGGGCTGCTT	CAGGAAACAGCTATGACCGGCAAAAAGGAAACAAGAA	691
738	NOTCH1	A30	EXON 19	TGTAAAACGACGGCCAGTGTTGAGCAGAAGGGGAGGT	CAGGAAACAGCTATGACTCAGCAGGTCCAGACCAC	627
739	NOTCH1	A31	EXON 20/EXON 21	TGTAAAACGACGGCCAGTCCAGGCTGTTCCTGGTGT	CAGGAAACAGCTATGACTCAGGTTCAGTTTTCTCCACTG	735
740	NOTCH1	A32	EXON 22	TGTAAAACGACGGCCAGTCCTGAGGGCAGCTCATGT	CAGGAAACAGCTATGACGTCGTCCACGTTGATCTCAC	635
741	NOTCH1	A33	EXON 23/EXON 24	TGTAAAACGACGGCCAGTGTCTTCCGGGACGGACAC	CAGGAAACAGCTATGACACGTGGACCTCTCCAGGTG	622
742	NOTCH1	A34	EXON 25.1	TGTAAAACGACGGCCAGTGCCTCCCAGGTTAGAGGAGA	CAGGAAACAGCTATGACCAGGCTGCAGACCTTGTTG	529
743	NOTCH1	A35	EXON 25.2	TGTAAAACGACGGCCAGTCTACAACCAGGGGACCTGTG	CAGGAAACAGCTATGACCCCTGAGCAGAGCCTTAGAA	532
744	NOTCH1	A36	EXON 26	TGTAAAACGACGGCCAGTTGCAGTTCTAAGGCTCTGCTC	CAGGAAACAGCTATGACCGGAACCTCCGTCTCTTTTA	732
745	NOTCH1	A37	EXON 27	TGTAAAACGACGGCCAGTGTCCTGACTGTGGCGTCAT	CAGGAAACAGCTATGACCCCAACAAAGAAAATTCAGGA	571
746	NOTCH1	A38	CNS 13	TGTAAAACGACGGCCAGTGCTGTTTGTGCCAGTTGCTA	CAGGAAACAGCTATGACGCCACGTACATGAAGTGCAG	707
747	NOTCH1	A39	EXON 28	TGTAAAACGACGGCCAGTGGAGGAGAGTGGGTGAGGA	CAGGAAACAGCTATGACCTAGGAAGCCCCCAGAGAC	515
748	NOTCH1	A40	EXON 29/EXON 30	TGTAAAACGACGGCCAGTATCCTCACCGGGAGTCTG	CAGGAAACAGCTATGACTGGTGGAAGAACAGGAGGAC	689
749	NOTCH1	A41	EXON 31	TGTAAAACGACGGCCAGTACCAAGTGCTGGGTGGTG	CAGGAAACAGCTATGACAGGTGGAGGCACCAGTTGT	589
750	NOTCH1	A42	EXON 32/EXON 33	TGTAAAACGACGGCCAGTCCTGTCTGTGGGCAGCAC	CAGGAAACAGCTATGACCGAGACCCTGTGGGTCAG	718
751	NOTCH1	A43	EXON 34.1	TGTAAAACGACGGCCAGTTTCCTCTGGTGATGGAACCT	CAGGAAACAGCTATGACGGACGGAGACTGCTGGAAC	619
752	NOTCH1	A44	EXON 34.2	TGTAAAACGACGGCCAGTCAAGGCACGGAGGAAGAA	CAGGAAACAGCTATGACAGCTCATCATCTGGGACAGG	601
753	NOTCH1	A45	EXON 34.3	TGTAAAACGACGGCCAGTTTGAATGGTCAATGCGAGTG	CAGGAAACAGCTATGACTGTCCACAGGCGAGGAGTA	612
754	NOTCH1	A46	EXON 34.4	TGTAAAACGACGGCCAGTGAGCTTCCTGAGTGGAGAGC	CAGGAAACAGCTATGACCCTGGCTCTCAGAACTTGCT	682
755	NOTCH1	A47	EXON 34.5	TGTAAAACGACGGCCAGTCGACCAGAGGAGCCTTTTTA	CAGGAAACAGCTATGACCATGCTTGCAAGAAACCATCT	617
756	NOTCH1	A48	EXON 34.6 coding	TGTAAAACGACGGCCAGTCAGCATCACCTGCCTGTTAG	CAGGAAACAGCTATGACGGCTCTGGCAAGTCTCCTAC	604
757	NOTCH1	A49	EXON 34.7 coding	TGTAAAACGACGGCCAGTTTTCTGGGGAAAGACACTGC	CAGGAAACAGCTATGACAACATCTTGGGACGCATCTG	628
758	NOTCH1	A50	EXON 34.8	TGTAAAACGACGGCCAGTCCAGTGAGGGACGTCAGACT	CAGGAAACAGCTATGACCTGGCTCCCTCAGAGCATAG	426
759	DLL1	A1	CNS 1	TGTAAAACGACGGCCAGTTGAAAGCAAGGAATGCAACA	CAGGAAACAGCTATGACATAGGCCACACAGCCAAAAG	500
760	DLL1	A2	CNS 2/CNS3	TGTAAAACGACGGCCAGTGTTACCTTTTGGCTGTGTGG	CAGGAAACAGCTATGACCCATTCACAGGCATTCAGAC	592
761	DLL1	A3	CNS 4	TGTAAAACGACGGCCAGTCCAAAACTGACGGAAGGAGA	CAGGAAACAGCTATGACGTTCGTGTGTGGTGGTGACT	428
762	DLL1	A4	CNS5/CNS6	TGTAAAACGACGGCCAGTCTGTGGCTGCAGCTCTGAT	CAGGAAACAGCTATGACAGGAGAGACTCGAGGTCCAA	614
763	DLL1	A5	CNS 7	TGTAAAACGACGGCCAGTATGGGGGAGAGGAAGAAGG	CAGGAAACAGCTATGACTGCCTGTTTAGAAAACTGGAAAT	435
764	DLL1	A6	CNS 8	TGTAAAACGACGGCCAGTGCAGCTCTAACACACCTACAGTG	CAGGAAACAGCTATGACGGTAATGCAGACAGCACCTG	535
765	DLL1	A7	CNS 9.1	TGTAAAACGACGGCCAGTCGAACTTCGTCCTCCTGCT	CAGGAAACAGCTATGACCGCAGAGGATCTGGCTCTC	576
766	DLL1	A8	CNS 9.2	TGTAAAACGACGGCCAGTATTTGGCGATCCATTGAGAG	CAGGAAACAGCTATGACGGAGGGGGAGAAAGAGAAAG	608
767	DLL1	A9	CNS 9.3 & Exon 1.1	TGTAAAACGACGGCCAGTAAAGACGCGGATCTTTGCT	CAGGAAACAGCTATGACACACAGCAAGGCCGAGAG	726
768	DLL1	A10	Exon 1.2	TGTAAAACGACGGCCAGTAGAAAGAAGTCCTGGGTCCTG	CAGGAAACAGCTATGACCAGAGCTCCAGACCTGCAC	528
769	DLL1	A11	Exon 2	TGTAAAACGACGGCCAGTCTGAGCCCTTCCAGGCTCT	CAGGAAACAGCTATGACCTGCTGGGCTGGAGTCCT	599
770	DLL1	A12	Exon 3	TGTAAAACGACGGCCAGTCTGGCTGTTAGGAATGACTGC	CAGGAAACAGCTATGACCACGTGCAGAATGAAAGCTG	285
771	DLL1	A13	Exon 4	TGTAAAACGACGGCCAGTCTTCCCGTGCTGAATGTCTC	CAGGAAACAGCTATGACCTCAGTTTCCCCACCAGAAC	507
772	DLL1	A14	CNS 10	TGTAAAACGACGGCCAGTGCGCGTGCCATAGATTAGAT	CAGGAAACAGCTATGACCCAGGTTGTGGAGGACTGAC	521
773	DLL1	A15	Exon 5	TGTAAAACGACGGCCAGTAACTCAGCTGGGATTTGCTG	CAGGAAACAGCTATGACTGATCACCTAGGGCTGTTTTT	304
774	DLL1	A16	Exon 6 and Exon 7	TGTAAAACGACGGCCAGTCCAAGGTGACCCAGTGTTCT	CAGGAAACAGCTATGACTTTCCAAAGTTGCTCCAAGG	711
775	DLL1	A17	Exon 8	TGTAAAACGACGGCCAGTTGTAAGAACGGAGGGAGCTG	CAGGAAACAGCTATGACGGCGGTCTGGATAAAAGTGA	513
776	DLL1	A18	Exon 9.1	TGTAAAACGACGGCCAGTGCTTCAGAGTGACTTTTTGGTG	CAGGAAACAGCTATGACCCAGGTTGTTCATGGTCTCC	635
777	DLL1	A19	Exon 9.2	TGTAAAACGACGGCCAGTGGTGGACCTCACTGAGAAGC	CAGGAAACAGCTATGACGAAGTTGAACAGCCCGAGTC	670
778	DLL1	A20	Exon 10 and Exon 11.1	TGTAAAACGACGGCCAGTGACCCCGACCACACTCAG	CAGGAAACAGCTATGACCAGGCAGTGCATGCTTCTTA	714
779.3	DLL1	A21	Exon 11.2	TGTAAAACGACGGCCAGTGCAAGACTCCCGTTTCTCTT	CAGGAAACAGCTATGACGAGCACACCTCCGCTCTAAG	735
780	DLL1	A22	Exon 11.3	TGTAAAACGACGGCCAGTTTGATACGAAGATGTGCTTTTTCT	CAGGAAACAGCTATGACCGTGCCTGCTCTTACCAAGT	534
781	UCP2	A1	CNS 1.1	TGTAAAACGACGGCCAGTGCGTCCTGTTGATCTCCACT	CAGGAAACAGCTATGACGTGCGTTTGGGGAGTAGAAG	725
782	UCP2	A2	CNS 1.2	TGTAAAACGACGGCCAGTCTCTGGTCCCCTCAGCTGTT	CAGGAAACAGCTATGACCTCGCTGTCGATTGGTTACA	622
783.2	UCP2	A3/783.2 FWD	CNS 1.3 AND Exon 1.1	TGTAAAACGACGGCCAGTAGTGTCCTGGTCCCTAAACG	CAGGAAACAGCTATGACGGCCTGCCAGCTCCTACT	621
784	UCP2	A4	Exon 1.2	TGTAAAACGACGGCCAGTAGTGACCATCTCGGGGAAC	CAGGAAACAGCTATGACACTTGGGTGGGAGAGAAGGT	480
785	UCP2	A5	Exon 2	TGTAAAACGACGGCCAGTCTTTTCCCCTTTCCAGTGTG	CAGGAAACAGCTATGACTTAATGCCCTGCTGACTCCT	411
786	UCP2	A6	CNS 2	TGTAAAACGACGGCCAGTGCCATCTTACCCACCCTCT	CAGGAAACAGCTATGACGCTGCCCTTATTTCCATGTG	435
787	UCP2	A7	CNS 3 and CNS 4	TGTAAAACGACGGCCAGTCCCTGTTCTATAGGTCCCAGTG	CAGGAAACAGCTATGACGACTCCTCCTGGCCTACCAT	534
788	UCP2	A8	Exon 3	TGTAAAACGACGGCCAGTTTCTATTAGGGAAGGTGAGTTTGG	CAGGAAACAGCTATGACCCAAACACTGGCCCTTGAG	433
789	UCP2	A9	Exon 4	TGTAAAACGACGGCCAGTCAGTGTTTGGAGCATCGAGA	CAGGAAACAGCTATGACGGATCGTGGGGCCTAAAA	426
790	UCP2	A10	CNS 5	TGTAAAACGACGGCCAGTGAGCCAGGACACTCGTCTCT	CAGGAAACAGCTATGACGGGCTTGCACTCATTTTCTA	533
791	UCP2	A11	Exon 5 and Exon 6	TGTAAAACGACGGCCAGTTCCCAAAAGCAGGAGATGAC	CAGGAAACAGCTATGACGCAAAGGGCAAATAGGATGA	630
792	UCP2	A12	Exon 7	TGTAAAACGACGGCCAGTGACAGGGTTTTTGCCATGTT	CAGGAAACAGCTATGACGGGATAGGTGAATGCTGGTG	589
793.2	UCP2	A13/793.2	Exon 8.1	TGTAAAACGACGGCCAGTAGAGCAACTGGGTTGGATTG	CAGGAAACAGCTATGACTTGGACCAAGACCTCTGGTAA	619
794	UCP2	A14	Exon 8.2 and CNS 6	TGTAAAACGACGGCCAGTTCTTTCCCCACCTCTTCCTT	CAGGAAACAGCTATGACGGAGCACTCTTGTTGTGCAG	611
795	UCP3	A1	CNS 1	TGTAAAACGACGGCCAGTTCTATCCTGGCACCTCTAATCC	CAGGAAACAGCTATGACCTGCCCAGCAGACCTATGAG	616
796	UCP3	A2	CNS 2	TGTAAAACGACGGCCAGTAATTTAGGCATGGAGGGTGA	CAGGAAACAGCTATGACAAGCCTTGCTGTTCTCAGAC	635
797	UCP3	A3	CNS 3	TGTAAAACGACGGCCAGTTGGTTTCTAAACCCTATTGAGGTC	CAGGAAACAGCTATGACGAGCTTGTGAGCACTGAGAAAA	433
798	UCP3	A4	CNS 4 & putat X.1	TGTAAAACGACGGCCAGTGCTTTGTAAACCAGGCAGCTC	CAGGAAACAGCTATGACGCAGTCAGCTGTGTCAAGGA	631
799	UCP3	A5	CNS 5 & puta X.2	TGTAAAACGACGGCCAGTAGCCCAGACTGGAGGAGTG	CAGGAAACAGCTATGACCTCTGGCAGTTAGGGCACA	614
800	UCP3	A6	CNS 6.1 prom	TGTAAAACGACGGCCAGTCCAGCCCTTACTCTGAGTGC	CAGGAAACAGCTATGACTTCTGAGTGGCACAACCATC	601
801	UCP3	A7	CNS 6.2 prom	TGTAAAACGACGGCCAGTGCCAGTCACAAACAAGCACA	CAGGAAACAGCTATGACACGAGGTCTTGCTGTGTTCC	463
802	UCP3	A8	CNS 6.3 prom	TGTAAAACGACGGCCAGTTTAGGTCGGGTGCAGTGG	CAGGAAACAGCTATGACTATACACACGGGCTGACCTG	580
803	UCP3	A9	CNS 6.4 prom & Exon 1	TGTAAAACGACGGCCAGTGGAAGCGTCCACAGCTTAAA	CAGGAAACAGCTATGACGCCACAGCTCCCTTTTCATA	527
804	UCP3	A10	Exon 2 & CNS 7	TGTAAAACGACGGCCAGTCCTTTCTAAAGCCCCTCCTG	CAGGAAACAGCTATGACGCAGCATTTTACCATTCACAAA	700
805	UCP3	A11	Exon 3	TGTAAAACGACGGCCAGTGCAAGCCACGAAGCACTTAT	CAGGAAACAGCTATGACCTGGCTCTGCCTCTGAGTCT	593
806	UCP3	A12	Exon 4	TGTAAAACGACGGCCAGTAAAGGGGTGGCTGAAAGTGT	CAGGAAACAGCTATGACACTGAGTTTGAGGGGCTGTG	621
807	UCP3	A13	Exon 5	TGTAAAACGACGGCCAGTGGGATCCTCTGGCTGAGAC	CAGGAAACAGCTATGACACCACAATGTACCTGGCACT	434
808	UCP3	A14	Exon 6	TGTAAAACGACGGCCAGTCCAGGCCTAGTTTGCCAGTA	CAGGAAACAGCTATGACACGGTAGCCACATTCGAAAA	461
809	UCP3	A15	CNS 8	TGTAAAACGACGGCCAGTAAATGCCACAAAGAAGAAGTTTA	CAGGAAACAGCTATGACTTTTGCTGTCAGGAACTTGC	530
810	UCP3	A16	Exon 7.1	TGTAAAACGACGGCCAGTCTGGATCCTCTGGCACTACC	CAGGAAACAGCTATGACTGCCATCCTTCCTGCTTATC	626
811	UCP3	A17	Exon 7.2	TGTAAAACGACGGCCAGTCACCTTTGTTTTGCACTGACA	CAGGAAACAGCTATGACTTAGATTTACACAGAGCTTTTGCTT	630
812	UCP3	A18	Exon 7.3	TGTAAAACGACGGCCAGTTCCCTGACGACACTGAAGAA	CAGGAAACAGCTATGACCCCTGCCCTGACACATAGAA	619
813	SIRT1	A1	CNS 1.1	TGTAAAACGACGGCCAGTTGGCCAGAACCCATACTAGG	CAGGAAACAGCTATGACGTCCTCCTGGGAAGACCTTT	598
814	SIRT1	A2	CNS 1.2	TGTAAAACGACGGCCAGTCATTTCCTTCCCATGCTCTC	CAGGAAACAGCTATGACCGTGTAGTGCAGCCAAATTC	617
815	SIRT1	A3	CNS 1.3 & Exon 1.1	TGTAAAACGACGGCCAGTGCCAGCTTCAGCTGTGTTTT	CAGGAAACAGCTATGACATCTCTCCGCGGCCTCTT	626
816	SIRT1	A4	Exon 1.2	TGTAAAACGACGGCCAGTCCAGAGAGGCAGTTGGAAGA	CAGGAAACAGCTATGACCAACCTCAGGCCAGTAGGAG	558
817	SIRT1	A5	CNS 2	TGTAAAACGACGGCCAGTGGGCTGCGGTTCCTACTG	CAGGAAACAGCTATGACCAGGAACAGCCACGTTCTTT	455
818	SIRT1	A6	Exon 2	TGTAAAACGACGGCCAGTTTCCAATGAACAGTGCAAGC	CAGGAAACAGCTATGACCGTAGTGGCATATGCATGTAATC	511
819	SIRT1	A7	Exon 3	TGTAAAACGACGGCCAGTTTGGGATATAGCATTAATTCTGAGTG	CAGGAAACAGCTATGACCCAGAAAAATGTTTCCTACTTGG	521
820	SIRT1	A8	Exon 4	TGTAAAACGACGGCCAGTTTTCTGAAATAAGGGTAGGGTTG	CAGGAAACAGCTATGACGGTGGCTGTATGTGAACAAAA	419
821	SIRT1	A9	CNS 3.1	TGTAAAACGACGGCCAGTAGAAGCCTGGGTAGTAGAACCT	CAGGAAACAGCTATGACTGGTCCTCCCAACTTTTGAC	611
822	SIRT1	A10	CNS 3.2	TGTAAAACGACGGCCAGTGAGCCTGTAATGAATGGTAAGGA	CAGGAAACAGCTATGACACAGATATCAAGGTAGGGTGATT	494
823	SIRT1	A11	CNS 3.3 & Exon 5	TGTAAAACGACGGCCAGTTGAATTTGCAGCCAACAAAA	CAGGAAACAGCTATGACCTCCACTTCTCGATGGCAGT	599
824	SIRT1	A12	Exon 6	TGTAAAACGACGGCCAGTTCTGCAGTGTGTTCTGAGGTTT	CAGGAAACAGCTATGACGCTTATGATCTGACATTTTATGTTCG	534
825	SIRT1	A13	Exon 7	TGTAAAACGACGGCCAGTCCCATCATTGACAGTTGCTG	CAGGAAACAGCTATGACCAATTTCTAAAATTAGCTCTTCACCA	511
826	SIRT1	A14	Exon 8.1	TGTAAAACGACGGCCAGTGTCTGGGAAGATTGCTCAGG	CAGGAAACAGCTATGACTGGTGGTGAAGTTCTTTCTGG	568
827	SIRT1	A15	Exon 8.2	TGTAAAACGACGGCCAGTTTGCCTCATCTGCATTTTGA	CAGGAAACAGCTATGACATCGATTAACCTGCCGAAAT	632
828	SIRT1	A16	Exon 9.1	TGTAAAACGACGGCCAGTGCTGGAACCCACACTTCATT	CAGGAAACAGCTATGACGTTAAAAATTATCCATGAAAAACAATC	609
829	SIRT1	A17	Exon 9.2	TGTAAAACGACGGCCAGTTGTGCAGGTACAGGAATTGTTC	CAGGAAACAGCTATGACCGAGTGCTCTCCCCACATA	633
830	SIRT1	A18	Exon 9.3	TGTAAAACGACGGCCAGTGGGAACAGCTAATCTAGACCAAA	CAGGAAACAGCTATGACTGGAAAACAGCAGTCCAAAA	632
831	SIRT1	A19	Exon 9.4	TGTAAAACGACGGCCAGTTTGTTGTTTAAATACCTATCACTGTGG	CAGGAAACAGCTATGACTCCTAGCTGGGTGTTTTATGC	634
832	SIRT1	A20	Exon 9.5	TGTAAAACGACGGCCAGTTCAGCTGCAAAAGCTTCTAGTC	CAGGAAACAGCTATGACTACCTTAAACAATGTAAGTTAACAGAA	610
833	SIRT1	A21	Exon 9.6	TGTAAAACGACGGCCAGTTTTGCATGATGTTTGTGTGC	CAGGAAACAGCTATGACGATCAGCACCATCAGGGTTT	449
834	SIRT3	A1	CNS 1.1	TGTAAAACGACGGCCAGTGTGGCCCTGAAAGTGTGTTT	CAGGAAACAGCTATGACCCGGAAGTGAGTGAGCATTT	598
835	SIRT3	A2	CNS 1.2	TGTAAAACGACGGCCAGTGCGCTCACTTCTTCGTGTAG	CAGGAAACAGCTATGACCGGAGGTCAAACCTGGAG	618
836	SIRT3	A3	CNS 1.3 and Exon 1.1	TGTAAAACGACGGCCAGTCGGAATTGCTCCTGTCAAAT	CAGGAAACAGCTATGACCCCATGGCTGCCTCTCAG	616
837.2	SIRT3	A4/837.2	Exon 1.2	TGTAAAACGACGGCCAGTGCGAGAGATGAGACACCAGA	CAGGAAACAGCTATGACACACGGCAAGGTGAGAAAGA	631
838	SIRT3	A5	CNS 2	TGTAAAACGACGGCCAGTTATTTTGGGCAAGGACAAGC	CAGGAAACAGCTATGACCGTCTCAGCCTCCGAAAG	631
839	SIRT3	A6	Exon 2	TGTAAAACGACGGCCAGTCTGGGGAGACACACATGCT	CAGGAAACAGCTATGACGGGAGATCGTACTGCTGGAG	527
840	SIRT3	A7	Exon 3	TGTAAAACGACGGCCAGTCAGTGGCATTCCAGACTTCA	CAGGAAACAGCTATGACCCTTGGGAACAAAGCCCTA	613
841	SIRT3	A8	Exon 4	TGTAAAACGACGGCCAGTAAGTTGTGCTCTTGGCCTTG	CAGGAAACAGCTATGACTTTCACACTATTATTGTTCAACTGTCC	321
842	SIRT3	A9	CNS 3	TGTAAAACGACGGCCAGTGCTTTTTGCTGGGCTGAG	CAGGAAACAGCTATGACTACTTCGGCAGGCATCTAGC	494
843	SIRT3	A10	Exon 5 & putat Exon_X1	TGTAAAACGACGGCCAGTTTTGGGGGAGAATGTTTGAG	CAGGAAACAGCTATGACAGCTTCCCACCTTCCTGTCT	690
844	SIRT3	A11	CNS 4	TGTAAAACGACGGCCAGTGGTGCTGGAGTGAGCAGAC	CAGGAAACAGCTATGACGCATTAACAACGCAGCACAT	516
845	SIRT3	A12	Exon 6	TGTAAAACGACGGCCAGTTCAGCTGAAGAAATGAGATTGG	CAGGAAACAGCTATGACTGCAGGATTCACAGCATCAT	532
846	SIRT3	A13	Exon 7.1	TGTAAAACGACGGCCAGTCTGCAGCTAGAGCTGTTTGAA	CAGGAAACAGCTATGACCACCAGGGCCTCAAGACTAC	605
847	SIRT3	A14	Exon 7.2 & putat Exon_X2	TGTAAAACGACGGCCAGTGACTGTGACCCTCTTGAACTGA	CAGGAAACAGCTATGACGGACTCAGCCTGGGTTTTAAG	635
848	PPARG	A1	CNS 1	TGTAAAACGACGGCCAGTCTTCATTTCTCAGGCAATTCAC	CAGGAAACAGCTATGACAGGGAGAAATAACCCTCAGC	496
1552	PPARG	A2	aXA1 alt Ex	TGTAAAACGACGGCCAGTCCTAAACTTCGGATCCCTCCT	CAGGAAACAGCTATGACGTAGACGCGACCCTCAGC	764
850	PPARG	A3	aXe! -1	TGTAAAACGACGGCCAGTTTGTGGGCTCCTGCAAGT	CAGGAAACAGCTATGACGACGACTATTTTTGACTTGATTTCTT	534
851	PPARG	A4	aUTR-1	TGTAAAACGACGGCCAGTTCGTTATGCATGCTATTATTAAAACTT	CAGGAAACAGCTATGACAAAGGTTCTACCATAAAATAAATTTGC	635
852	PPARG	A5	aXA2 alt Ex	TGTAAAACGACGGCCAGTTGATGAATCATTTTGTGGTCTG	CAGGAAACAGCTATGACCTTCTAGGTCATTTTCCTATCTTACC	532
853	PPARG	A6	CNS 2	TGTAAAACGACGGCCAGTTTCTTCAGTCCAGATCCTGTGAT	CAGGAAACAGCTATGACAAAAATTAGGTCTTGTCAATTGTATTT	648
854	PPARG	A7	CNS 3	TGTAAAACGACGGCCAGTGATTCCCCCTCCCTCAAATA	CAGGAAACAGCTATGACGGGGATGATGAAAACTTGGA	709
855	PPARG	A8	CNS 4.1	TGTAAAACGACGGCCAGTTGGTGGTGTGTTATTCTTCTCA	CAGGAAACAGCTATGACCTGCTTTGGCAAGACTTGGT	671
856	PPARG	A9	CNS 4.2 and Exon 1	TGTAAAACGACGGCCAGTTTCCATTTAAGAAGCAATTGTG	CAGGAAACAGCTATGACCAACCTGGAAGACAAACTACAAGA	635
857	PPARG	A10	CNS 5	TGTAAAACGACGGCCAGTTCTTTTCCAACCCACTTCCA	CAGGAAACAGCTATGACTCCCTTTTACTCTGGGACACC	628
858	PPARG	A11	Exon 2	TGTAAAACGACGGCCAGTATGTATCTGCACTGTTTCAGGA	CAGGAAACAGCTATGACTGGGTGAATAAATGAATGGTGA	634
859	PPARG	A12	Exon 3	TGTAAAACGACGGCCAGTACTATGGTGGCTTGCCCTGT	CAGGAAACAGCTATGACTTGTAAAAATCTGCAAGATGCAA	628
860	PPARG	A13	CNS 6	TGTAAAACGACGGCCAGTCAGTTGGCCTCAAATTGACA	CAGGAAACAGCTATGACGAGGATCTCCAGGTCCCTTT	512
861	PPARG	A14	Exon 4	TGTAAAACGACGGCCAGTAGGGACCTGGAGATCCTCTG	CAGGAAACAGCTATGACGAAATGTTTTATCGCCATGC	526
862	PPARG	A15	Exon 5	TGTAAAACGACGGCCAGTCAGGACTCAAGAGCAGTGGA	CAGGAAACAGCTATGACCACTTCCTGCGTTTCAGACTC	521
863	PPARG	A16	CNS 7	TGTAAAACGACGGCCAGTTGGAGGCTGAGGAGAATCAC	CAGGAAACAGCTATGACGGCTTCTTGGCACAGAACAT	480
864	PPARG	A17	Exon 6	TGTAAAACGACGGCCAGTGTTTTCTGAACCTGGGATGG	CAGGAAACAGCTATGACGCAGACTAACACTAAGGAAATCCA	654
865	PPARG	A18	Exon 7	TGTAAAACGACGGCCAGTCAGATGAGTTGCTTGGTAGAGC	CAGGAAACAGCTATGACGGAAGAGTGAGAGGGATGGA	695
866	PPARG	A19	CNS 8	TGTAAAACGACGGCCAGTTCTCAAAAGATTTTGCCTCCA	CAGGAAACAGCTATGACGGCAGTGCTAAGTCTCAAACG	513
867	PPARG	A20	CNS 9	TGTAAAACGACGGCCAGTGCAAACTTTCTGCCTGGTTT	CAGGAAACAGCTATGACCCTGGCAGGAGAAATTAGGG	615
868	PPARG	A21	CNS 10	TGTAAAACGACGGCCAGTGGAACTGTTTCTGCCTCCAG	CAGGAAACAGCTATGACGGGAGCGTTCTCCTTAAAGT	635
869	PPARGC1A	A1	CNS 1	TGTAAAACGACGGCCAGTCTGCTGTGGTTCTTGGCATA	CAGGAAACAGCTATGACCACCCTTCAGGGTTCAATGT	611
870	PPARGC1A	A2	CNS 2	TGTAAAACGACGGCCAGTTCCCTATGTTTGCCCTTTTG	CAGGAAACAGCTATGACCCAATCATATCCAGTTTGAGTCT	534
871	PPARGC1A	A3	CNS 3	TGTAAAACGACGGCCAGTAAAATAAGAAAACCCTAACAATACAA	CAGGAAACAGCTATGACGCATAAAAAGGTGGCCAAGA	566
872	PPARGC1A	A4	CNS 4.1	TGTAAAACGACGGCCAGTGGGGGATTGTTTTCAGGTAA	CAGGAAACAGCTATGACCCCATCCTTTCAGCTTCCTT	632
873	PPARGC1A	A5	CNS 4.2	TGTAAAACGACGGCCAGTCAGGGCACTAGGGTTGGAAT	CAGGAAACAGCTATGACCAAAACAAGCAAGTGGCAAA	621
874	PPARGC1A	A6	CNS 4.3	TGTAAAACGACGGCCAGTCACTCCCTCAATGAGAAAATGTC	CAGGAAACAGCTATGACCCACAGTGACACAGAGCACA	618
875	PPARGC1A	A7	Exon 1	TGTAAAACGACGGCCAGTCGTCACGAGTTAGAGCAGCA	CAGGAAACAGCTATGACTCCTGCCTGGACTACTTTCC	429
876	PPARGC1A	A8	Exon 2	TGTAAAACGACGGCCAGTAGGATGTTTTTCCTGGTGATT	CAGGAAACAGCTATGACTTCCAAATGCTGTTTTTCCA	533
877	PPARGC1A	A9	CNS 5	TGTAAAACGACGGCCAGTCCAAGGTTTAAAGTCCTTGCTG	CAGGAAACAGCTATGACCTCAACAATTCTGGGGGAAA	630
878	PPARGC1A	A10	CNS 6	TGTAAAACGACGGCCAGTGGAGGAAGACAAGAAAAAGGA	CAGGAAACAGCTATGACCCCGCAAATGGTTTGTTTTA	533
879	PPARGC1A	A11	CNS 7	TGTAAAACGACGGCCAGTAACATCATGTCAAGTGCAGGAG	CAGGAAACAGCTATGACTTCAGTGACCCTAACTTATCCAGA	432
880	PPARGC1A	A12	CNS 8	TGTAAAACGACGGCCAGTTGTGCAGCTGTAGATCACTGTC	CAGGAAACAGCTATGACGGGTGACTCACAGAGGTGCT	634
881	PPARGC1A	A13	Exon 3	TGTAAAACGACGGCCAGTCCAAAACATGAATTTGGAGTTTG	CAGGAAACAGCTATGACGGATTGCTTTGGCATCATTC	515
882	PPARGC1A	A14	Exon 4	TGTAAAACGACGGCCAGTTGCGCTAAGGTGTGACATAAA	CAGGAAACAGCTATGACTTCTGCATCTTAAAGCCACTCA	632
883	PPARGC1A	A15	CNS 9	TGTAAAACGACGGCCAGTGGCAATGCCATAATTCAGCTA	CAGGAAACAGCTATGACTTCGCTTTATTGCTCCATGA	502
884	PPARGC1A	A16	Exon 5	TGTAAAACGACGGCCAGTGCAAACAGTTATTCACAGCTCAT	CAGGAAACAGCTATGACTCTTCCCCCGCTCTGTAATA	535
885	PPARGC1A	A17	Exon 6 and Exon 7	TGTAAAACGACGGCCAGTCGAATGGTAGTTTACTGATGCAA	CAGGAAACAGCTATGACTGCAGATAACTTCTTATCCAATTTTGT	607
886	PPARGC1A	A18	CNS 10	TGTAAAACGACGGCCAGTTTCAATTAAACAAACAAACCCAAA	CAGGAAACAGCTATGACAGGCTGAAGGCTGACAAGAG	532
887	PPARGC1A	A19	Exon 8.1	TGTAAAACGACGGCCAGTTTGGTGACAGAGGCTTAGGG	CAGGAAACAGCTATGACCTGCCAATCAGAGGAGACATC	614
888	PPARGC1A	A20	Exon 8.2	TGTAAAACGACGGCCAGTTCAGTCCTCACTGGTGGACA	CAGGAAACAGCTATGACGAAAATAAGGATTTGGGTGGTG	628
889	PPARGC1A	A21	Exon 8.3	TGTAAAACGACGGCCAGTTGAACTGAGGGACAGTGATTT	CAGGAAACAGCTATGACAGTGCCAGAATTGCAGTGGT	508
890	PPARGC1A	A22	Exon 9 and Exon 10	TGTAAAACGACGGCCAGTGCTCCACAGTGCCGATAAAC	CAGGAAACAGCTATGACAAGCCAAAAGGCTGAAAATG	621
891	PPARGC1A	A23	Exon 11 and CNS 11.1	TGTAAAACGACGGCCAGTTCTCTGCGTCAGCCTCCT	CAGGAAACAGCTATGACAAGGTTCTGAACTCAACATGTCA	528
892	PPARGC1A	A24	CNS 11.2 and Exon 12	TGTAAAACGACGGCCAGTACCTGACACAACACGGACAG	CAGGAAACAGCTATGACAGTGATGGTTCAACCCAAGG	713
893	PPARGC1A	A25	Exon 13.1	TGTAAAACGACGGCCAGTTCTTGAATTGGAATGATTGAGTT	CAGGAAACAGCTATGACTTTGAAATGGTTTGCCCTTG	633
894.2	PPARGC1A	A26	Exon 13.2	TGTAAAACGACGGCCAGTTGGGTACATGTGAGGACTGG	CAGGAAACAGCTATGACTGCTTCAAGTTGATTCTGCAC	342
895	PPARGC1A	A27	Exon 13.3	TGTAAAACGACGGCCAGTACCAACCACAAACCACCCTA	CAGGAAACAGCTATGACGACCATTGACAAGGCTTTTG	411
896	PPARGC1A	A28	Exon 13.4	TGTAAAACGACGGCCAGTTTTCCTTTTGCCATGGAATC	CAGGAAACAGCTATGACTCGCAGAAGTGGTTAATACCTTT	693
897	PPARGC1A	A29	Exon 13.5	TGTAAAACGACGGCCAGTTTCAAATGTAATTATGAGGTGAAACA	CAGGAAACAGCTATGACTGTCTCTTTAGTAAACAAAGGAATGAA	693
898	PPARGC1A	A30	Exon 13.6	TGTAAAACGACGGCCAGTTTTTAATTTGATACAAAATGCTGAGG	CAGGAAACAGCTATGACTGGGGGTGAAATCCATCTTA	687
899	PPARGC1A	A31	Exon 13.7	TGTAAAACGACGGCCAGTAGTGTGGAGTCCCTGGAATG	CAGGAAACAGCTATGACCAACAATCCAGGGCAAAAAG	687
900	PPARGC1A	A32	Exon 13.8	TGTAAAACGACGGCCAGTCAGTCTTTCTTTCTGAATTTTGAGT	CAGGAAACAGCTATGACAAGCACCAGTTCGGTTACCA	631
901	PPARGC1A	A33	Exon 13.9	TGTAAAACGACGGCCAGTGCTGTGCTCCTCTCATTTTTATTT	CAGGAAACAGCTATGACTTTCACCTACAAATCTTAAAGTAGCTC	631
902	PPARGC1A	A34	Exon 13.10	TGTAAAACGACGGCCAGTTGATGGCTGTAATGAGAACTTCA	CAGGAAACAGCTATGACAAAAGCAAGGAGAAAGGGAAA	530
903	PPARGC1A	A35	CNS 12	TGTAAAACGACGGCCAGTACTGACTCGACTGTAGTGTTACTAGC	CAGGAAACAGCTATGACGAGTGGAAGGGAGGAAGCAT	508
904	PPARGC1A	A36	CNS 13	TGTAAAACGACGGCCAGTCGGGATGCTAAACCTGTACC	CAGGAAACAGCTATGACAGGTCCAGCAGTATTTTGTGC	522
1187	ING1	Pr001220650.1	altern. Prom	TGTAAAACGACGGCCAGTCAAAGCCAAAGCTCTCCTGCTG	CAGGAAACAGCTATGACGGTTGGTGGTGCTGCCTGTG	617
1188	ING1	Pr001220257.1	a Prom	TGTAAAACGACGGCCAGTTTTCCAAATCTTACCACCAGAATGTGT	CAGGAAACAGCTATGACACGCGAGCCCGTTGCCTA	621
1189	ING1	Pr001220404.1	a Prom/Exon1	TGTAAAACGACGGCCAGTTCGCCTAGGCAACGGGCT	CAGGAAACAGCTATGACAGAGGTGGATAGGCCCGAGG	293
1190	ING1	Pr001220210.1	a Exon1	TGTAAAACGACGGCCAGTAATCCGGGAGCTTTGGGAGG	CAGGAAACAGCTATGACTCGGTGTCCTTTGAGCTGCG	451
1317	ING1	1191.2	X1	TGTAAAACGACGGCCAGTACCGGGTGTCTGCATACTGT	CAGGAAACAGCTATGACAGCCCAATCACGATGAAGAG	518
1318	ING1	1191.3	X2	TGTAAAACGACGGCCAGTCTGCTGGGAGTGGTGGTC	CAGGAAACAGCTATGACAGGAGTTTTTGGCACTTGGA	529
1192	ING1	Pr001227115.1	a X2	TGTAAAACGACGGCCAGTGGTAGGTCTCCCGCGCACTC	CAGGAAACAGCTATGACCGTGGCCTTGCCTGTCACTT	597
1193	ING1	Pr001220213.1	a X2 / PROM	TGTAAAACGACGGCCAGTGGAGGACTACCTGGACTCCATCG	CAGGAAACAGCTATGACACCTCTCGCGCCTCCTTCCT	346
1194	ING1	Pr001220214.1	PROM / X3	TGTAAAACGACGGCCAGTCAACGCCGTTCCTCTGGC	CAGGAAACAGCTATGACCCCACCCAACTCTTCCGTTTC	577
1195	ING1	Pr001224979.1	X3	TGTAAAACGACGGCCAGTGCCGGGAATTGTTGGCTGTT	CAGGAAACAGCTATGACCGGAGGCCAGGAGGAGAACC	611
1196	ING1	Pr001224980.1	X3	TGTAAAACGACGGCCAGTGATTGGTCGCTGAGGCGGAT	CAGGAAACAGCTATGACCCGAGGACAGCACCTTCCAG	632
1197	ING1	Pr001227114.1	X3	TGTAAAACGACGGCCAGTTGAACGTCTTCGGGTCGCTC	CAGGAAACAGCTATGACACAGCTGGAACCCTGCACCC	635
1198	ING1	Pr001225627.1	X4	TGTAAAACGACGGCCAGTCGTGCGTGCCTGGGAACT	CAGGAAACAGCTATGACCGCTTGCTGTTGGGCTTGTC	633
1199	ING1	Pr001227077.1	X4	TGTAAAACGACGGCCAGTTCAGTCGCGAGACAGACGGG	CAGGAAACAGCTATGACCGGCACTTGGGACAGTACCACT	633
1200	ING1	Pr001227078.1	X4	TGTAAAACGACGGCCAGTAAGAAGCGCTCCAAGGCCAA	CAGGAAACAGCTATGACCCCTCCTCCCGCAAGAAATC	595
1201	ING1	Pr001225631.1	X4	TGTAAAACGACGGCCAGTTTGCTGCCTTTGTTGAGGTGC	CAGGAAACAGCTATGACAAAGCATGACTTGAGGTTCCTTGACT	604
1202	ING1	Pr001227080.1	X4	TGTAAAACGACGGCCAGTTGTGTTTCTTGCTGCCATGATGT	CAGGAAACAGCTATGACTGCTTAAGGCTTTGTCTAAATTGCTGG	551
1203	ING1	Pr001225632.1	X4	TGTAAAACGACGGCCAGTGTGGTCTAGTCAAGGAACCTCAAGTCA	CAGGAAACAGCTATGACTAAGCACGGCTGTGTTCCGC	596
1204	ING1	Pr001220088.1	X4	TGTAAAACGACGGCCAGTTTGCCAGCAAATAAATACGTGTCAAA	CAGGAAACAGCTATGACGTGCGAGACCAGCCATGACC	600
1223	ING1	A1	X2.1	TGTAAAACGACGGCCAGTCTCCAAGTGCCAAAAACTCC	CAGGAAACAGCTATGACCACTGGGCTGGGTAGAAGAG	410
1224.2	ING1	A2	X2.2	TGTAAAACGACGGCCAGTGGTATTTGGGTTTTCCACGTT	CAGGAAACAGCTATGACTTGGTATTTCGCGTCGATCT	627
1225.2	ING1	A3	CNS2	TGTAAAACGACGGCCAGTAAGGTACGGCCGGGTGAT	CAGGAAACAGCTATGACGGTGTCCAGCTCCAAGTGAG	635
1205	LMNA	Pr001044274.1	X1	TGTAAAACGACGGCCAGTGAGGTGTCCGGCATCAAGGC	CAGGAAACAGCTATGACCAGTGCCAAGCCCGCTAACA	613
1206	LMNA	Pr001079181.1	X2	TGTAAAACGACGGCCAGTGCAAGGATGCCCTCTCCTGG	CAGGAAACAGCTATGACTCACTGTGGTAGATCCCATTGGC	520
1207	LMNA	Pr001079090.1	X3	TGTAAAACGACGGCCAGTCCTGCAGGCATCCAAGGC	CAGGAAACAGCTATGACCCAGTCGGGTCTCATGACGG	620
1208	LMNA	Pr001046246.1	X4	TGTAAAACGACGGCCAGTGTGGCCAGCACTCAGCTCCC	CAGGAAACAGCTATGACCCCACCAGGTTGCTGTTCCTC	609
1209	LMNA	Pr001043648.1	X4/X5	TGTAAAACGACGGCCAGTGCCGTCATGAGACCCGACTG	CAGGAAACAGCTATGACCAACCCTGGGCTTCCAGCCT	597
1210	LMNA	Pr001079328.1	X6	TGTAAAACGACGGCCAGTGGACTTCCCAGTTGCCAGCC	CAGGAAACAGCTATGACCCCACCCTGTGTCTGGGATG	621
1211	LMNA	Pr001046236.1	X7	TGTAAAACGACGGCCAGTCAAGCTCTTGGAGGGCGAGG	CAGGAAACAGCTATGACGGCTCACCCTGGTCCACCCT	497
1212	LMNA	Pr001079327.1	X8/X9	TGTAAAACGACGGCCAGTGGGAAGGGCAGTGACAGGG	CAGGAAACAGCTATGACTCTGGAGCCTGCAACAGAGAGC	620
1213	LMNA	Pr001070337.1	X10	TGTAAAACGACGGCCAGTTAAGCAGCAGGCCGGACAAA	CAGGAAACAGCTATGACGGATATGCATGCAACAAGAATGGG	601
1313	LMNA	1214/16.1	Intron 10	TGTAAAACGACGGCCAGTCGTGCCAAAAATCTTTTCATT	CAGGAAACAGCTATGACGCAGGAAGGTGTGGTTCTGT	601
1314	LMNA	1214/16.2	X11	TGTAAAACGACGGCCAGTAGCTTGCTCCCGTTCTCTCT	CAGGAAACAGCTATGACCAGGATTTGGAGACAAAGCAG	634
1315	LMNA	1214/16.3	X11/Intron11	TGTAAAACGACGGCCAGTGCTCTTCTGCCTCCAGTGTC	CAGGAAACAGCTATGACGGGTTATTTTTCTTTGGCTTCA	628
1316	LMNA	1214/16.4	X12	TGTAAAACGACGGCCAGTCCAGAACTGCAGCATCATGT	CAGGAAACAGCTATGACAGAGGAACCTCAGCCAGGTG	623
1217	LMNA	Pr001043932.1	X12	TGTAAAACGACGGCCAGTGTGGAGGCTTCCTGCGTCCT	CAGGAAACAGCTATGACGCAGAGGAACCTCAGCCAGG	576
1218	LMNA	Pr001067642.1	X12	TGTAAAACGACGGCCAGTTAGAGGCTTCTCCGCCAGCC	CAGGAAACAGCTATGACCTTGCCTTCCTCCTCCACGG	478
1219	LMNA	Pr001070341.1	X12	TGTAAAACGACGGCCAGTCAGGTACCAGCTGCGCTTGC	CAGGAAACAGCTATGACGCAGGAGGATGCAGTGACCG	538
1226	LMNA	Pr001079182.1	CNS2	TGTAAAACGACGGCCAGTTTGGCCCACACTGGGTTGAG	CAGGAAACAGCTATGACGGCGTCCCAGGCAAATCAGT	405
1227	LMNA	A1	CNS1	TGTAAAACGACGGCCAGTCACCCTCGAGAGAGCTGAAT	CAGGAAACAGCTATGACCACGGGATGGACTTCTCAGT	523
1228	LMNA	A2	Prom_CNS3.1	TGTAAAACGACGGCCAGTCCCCACTACCTTCTTTCTGG	CAGGAAACAGCTATGACTTCTGGAACCTGAGTTCCTTT	532
1229	LMNA	A3	Prom_CNS3.2	TGTAAAACGACGGCCAGTGATTGGGGCAAAAGAAAGAA	CAGGAAACAGCTATGACGCTCAAGCTTCCCCTCTCTT	520
1230	LMNA	A4	Prom _CNS3.3 & X1.1	TGTAAAACGACGGCCAGTCCCTCTAGCCCAGAAGGTCT	CAGGAAACAGCTATGACCTGCAGGTCCTCCTTCTCCT	627
1231	LMNA	A5	X1.2	TGTAAAACGACGGCCAGTTCCGAGCAGTCTCTGTCCTT	CAGGAAACAGCTATGACCCCTCTCACTCCCTTCCTG	568
1232	LMNA	A6	CNS4	TGTAAAACGACGGCCAGTGAGAGGGTTGAGCTGAATCAA	CAGGAAACAGCTATGACGACATGAGAAGCCAGAGGAAG	535
1233	LMNA	A7	CNS5	TGTAAAACGACGGCCAGTGGGTCCTGAGAAAGGAAAGG	CAGGAAACAGCTATGACGAGTTCAGCAGAGCCTCCAG	724
1234	LMNA	A8	CNS6	TGTAAAACGACGGCCAGTAGGGTCTGAGGAGGTGGAGT	CAGGAAACAGCTATGACTCCATGTCCATAGTCCCAGAG	508
1235	LMNA	A9	CNS7	TGTAAAACGACGGCCAGTCCCGGCATATACACAGTTCC	CAGGAAACAGCTATGACAAGGCTGCGCTGAGTATCAC	610
1254	ZMPSTE24	Pr001058790.1	PROM	TGTAAAACGACGGCCAGTTGACAATTCATGGGCCACCA	CAGGAAACAGCTATGACGAGAGTGGACGGTAGCGTTGAGA	633
1255	ZMPSTE24	Pr001059060.1	PROM	TGTAAAACGACGGCCAGTAGAGAAATGGCGTTGCGCCT	CAGGAAACAGCTATGACCTGGGTTCCGGCCTAGGGTT	609
1256	ZMPSTE24	Pr001042131.1	PROM/X1.1	TGTAAAACGACGGCCAGTAGAGCCTGGGAAGTCGGCTG	CAGGAAACAGCTATGACTCGTCCCTTCAGAGCGTCCC	588
1257	ZMPSTE24	Pr001061357.1	X1.2	TGTAAAACGACGGCCAGTAACCCTAGGCCGGAACCCAG	CAGGAAACAGCTATGACCAGCAGGGACCACAAAGACGA	635
1258	ZMPSTE24	Pr001060310.1	X2	TGTAAAACGACGGCCAGTCCAGTCAGGTCACCTCAGGTTCTC	CAGGAAACAGCTATGACTTTGCTCCACAGCCGTTACTATCA	533
1259	ZMPSTE24	Pr001058559.1	X3	TGTAAAACGACGGCCAGTGCATGAGCCACCGTACTGGC	CAGGAAACAGCTATGACGCCTGGATTCTTGGCTTACCACA	544
1260	ZMPSTE24	Pr001058791.1	X4	TGTAAAACGACGGCCAGTTCCATGTGGTAAGCCAAGAATCCA	CAGGAAACAGCTATGACGCAACTGGCCAGAGCCACC	625
1261	ZMPSTE24	Pr001060295.1	X5	TGTAAAACGACGGCCAGTGACATTTACCCATTGTCTTAAGCTGCC	CAGGAAACAGCTATGACTCGCAAATGCACAACCCAAA	632
1262	ZMPSTE24	Pr001060297.1	X6.1	TGTAAAACGACGGCCAGTAGCCAACCAAGTAACAGCACACAA	CAGGAAACAGCTATGACCCCAGGTAGCCTTACCTTCCACA	632
1263	ZMPSTE24	Pr001060291.1	X6.2	TGTAAAACGACGGCCAGTTTCAGGTTCTTGTCACAATCTATGCTG	CAGGAAACAGCTATGACGCCACCAGTTTCTATCCCTGGC	384
1264	ZMPSTE24	Pr001058792.1	X7	TGTAAAACGACGGCCAGTCAGACACTCTCCACTGCTGGTGGT	CAGGAAACAGCTATGACTCCCTGAATTCAACACTCACTGCC	494
1265	ZMPSTE24	Pr001058793.1	X8	TGTAAAACGACGGCCAGTTGTGGAGCAGTGGTTCAGGGA	CAGGAAACAGCTATGACAACCAGGTAGCCTGGCTGTGG	419
1266	ZMPSTE24	Pr001060283.1	X9	TGTAAAACGACGGCCAGTTGGATGCTACTGATCCCATAGTGAAA	CAGGAAACAGCTATGACCCAAGCACTGGTGAATATGTGGC	565
1267	ZMPSTE24	Pr001059061.1	X10.1	TGTAAAACGACGGCCAGTGCCATTCCTCTTATCCCAAGCC	CAGGAAACAGCTATGACAGAAATGTCTTCAGTCACAGATCCTGG	401
1268	ZMPSTE24	Pr001058560.1	X10.2	TGTAAAACGACGGCCAGTCAAAGAGGTGGGCAGTGGCT	CAGGAAACAGCTATGACGCCCTCAAACACCTCACATGC	633
1269	ZMPSTE24	Pr001060277.1	X10.3	TGTAAAACGACGGCCAGTCCTGGCAGCATGTTCCAGCTC	CAGGAAACAGCTATGACTGATCACTGTGTAGCAAGAAAGGGAAG	583
1270	ZMPSTE24	Pr001060279.1	X10.4	TGTAAAACGACGGCCAGTGAGGGAGCATCACCACAGGAA	CAGGAAACAGCTATGACTCCCTGTAATGTCACAGAGATTCATCA	626
1271	ZMPSTE24	Pr001060280.1	X10.5	TGTAAAACGACGGCCAGTCGTGGTAGATATGATCCCATTGGAGG	CAGGAAACAGCTATGACCCCAAATGTCAGCGGAGCAA	604
1272	ZMPSTE24	Pr001060281.1	X10.6	TGTAAAACGACGGCCAGTAAGTGGCAGAACAGGAAAGACGAA	CAGGAAACAGCTATGACGGAAAGGCAGTTATCAGAGCATGAA	633
1273	ZMPSTE24	Pr001060276.1	X10.7	TGTAAAACGACGGCCAGTGGGATCAACTGTACGCCTTTGG	CAGGAAACAGCTATGACGACCAGGCAGGCCCAACAAT	618
1274	ZMPSTE24	CNS2 (jhw)	CNS2	TGTAAAACGACGGCCAGTCCCCAAAAGAAACTAAACATGC	CAGGAAACAGCTATGACTTGTTTTCCCAAAAGACATGC	335
1505	ZMPSTE24	CNS3 (jhw)	CNS3 - 1275.3	TGTAAAACGACGGCCAGTCATAGGAAGGCTAGGAACTTATAATCA	CAGGAAACAGCTATGACTGCCTTCATGGATAGCACTG	529
1319	FRAP1	Pr001077702.1	A1	TGTAAAACGACGGCCAGTCACGTACACCCTTACGTCCTCTGTC	CAGGAAACAGCTATGACGCCACCTATCCCAAGACCTCA	635
1320	FRAP1	Pr001072586.1	A2	TGTAAAACGACGGCCAGTGAGGGTGGTCCCACTGCACA	CAGGAAACAGCTATGACTGGTTTGAACCAACTTTCTAGCTGC	588
1321	FRAP1	Pr001076220.1	A3	TGTAAAACGACGGCCAGTCACGACCTGAGGCTTCTTGGC	CAGGAAACAGCTATGACGCTGTGGGAGAGCTCAGGGAA	596
1322	FRAP1	Pr001044216.1	A4	TGTAAAACGACGGCCAGTGCCTTGCCTATTCTCCTGAACCA	CAGGAAACAGCTATGACTGCATCGATTGCCAGGAAGA	453
1323	FRAP1	Pr001076280.1	A5	TGTAAAACGACGGCCAGTGGCCTAGGCTTGGGACCTGA	CAGGAAACAGCTATGACTGTCTGACGATAAGCTGTTGGCA	305
1324	FRAP1	Pr001076281.1	A6	TGTAAAACGACGGCCAGTTCAGCTGCATGGTGCCAAAG	CAGGAAACAGCTATGACGGAACTTGGAGAGCCAGCCC	579
1325	FRAP1	Pr001076221.1	A7	TGTAAAACGACGGCCAGTCACCAGTGAGCTTATCTCGAACCC	CAGGAAACAGCTATGACGGGTAGGTAGGGCAGGCGTT	590
1326	FRAP1	Pr001077705.1	A8	TGTAAAACGACGGCCAGTGAGCCTCTGCAGCCTCCCAC	CAGGAAACAGCTATGACCCTGGGTTTCACATCCCATGC	471
1327	FRAP1	Pr001043623.1	A9	TGTAAAACGACGGCCAGTCAGCGTGAGAACAGACTAATACATGCC	CAGGAAACAGCTATGACCCCTGATACGTCAACATGGCCT	474
1328	FRAP1	Pr001076222.1	A10	TGTAAAACGACGGCCAGTACCCAAAGCAAGCCGAGGG	CAGGAAACAGCTATGACTCCTCTCACTAAACCCAAGCTGC	567
1609	FRAP1	Pr001067155.1	A11	TGTAAAACGACGGCCAGTGGGAACAGCAGCCCTTGCTC	CAGGAAACAGCTATGACGCTTTGTGGGCCCTTTGGTC	572
1330	FRAP1	Pr001076223.1	A12	TGTAAAACGACGGCCAGTGATGGCATCACAATCAATAGGGAA	CAGGAAACAGCTATGACCCGTAGTTCACATGCACTCCTGTGT	323
1331	FRAP1	Pr001076284.1	A13	TGTAAAACGACGGCCAGTTCTGGACACGCTCTACAGCCAA	CAGGAAACAGCTATGACGGGTTCCAGTGGTCATCAGG	478
1332	FRAP1	Pr001076285.1	A14	TGTAAAACGACGGCCAGTTCTCCATATGGCCAGTGCTTTG	CAGGAAACAGCTATGACTCTGCCTGTGTTCTGAGCTGC	541
1333	FRAP1	Pr001043679.1	A15	TGTAAAACGACGGCCAGTGAGTTACCATGCCTGGCTCCC	CAGGAAACAGCTATGACCCCAGGTGATGCGGCTTGTA	633
1334	FRAP1	Pr001076287.1	A16	TGTAAAACGACGGCCAGTTCAATGAGCATGGGAGAGATGTAGC	CAGGAAACAGCTATGACTCACCCAAGCCTGGGACCTC	619
1335	FRAP1	Pr001076225.1	A17	TGTAAAACGACGGCCAGTGCGAATGATTGGCTGGTTGG	CAGGAAACAGCTATGACTGCTCTTGCTTTCTCCAGCCC	631
1336	FRAP1	Pr001076288.1	A18	TGTAAAACGACGGCCAGTTCAGTGGAAAGGCCAGAGGAAA	CAGGAAACAGCTATGACGGCACAATGCAGCCAACAAGA	634
1337	FRAP1	Pr001076248.1	A19	TGTAAAACGACGGCCAGTGGGCTCCAGCACCTCAAACA	CAGGAAACAGCTATGACGCGTTCCCTCGAAGACTGAGC	633
1338	FRAP1	Pr001076227.1	A20	TGTAAAACGACGGCCAGTCCGGGCTGTCGTGGTAGACTT	CAGGAAACAGCTATGACGGAAGGGAATGAACCATTTCAGA	635
1339	FRAP1	Pr001076228.1	A21	TGTAAAACGACGGCCAGTTGAGAAGCTGGTGAATGAGACG	CAGGAAACAGCTATGACCAAACACATTTGAGAGTTACTGGTTGG	634
1340	FRAP1	Pr001077715.1	A22	TGTAAAACGACGGCCAGTGGGCCCAGTCAGCTGTTACTCC	CAGGAAACAGCTATGACTCCGGGTGTTCAGAGCCTCA	572
1341	FRAP1	Pr001076289.1	A23	TGTAAAACGACGGCCAGTTTCCAGCTCCATCTGGCACTT	CAGGAAACAGCTATGACCCCTTCTCGCAGTGCACTCAT	635
1342	FRAP1	Pr001044168.1	A24	TGTAAAACGACGGCCAGTCAGGCTCCCTGGGCCTCTTA	CAGGAAACAGCTATGACTGCTAGCTCCTTCACATTGCCTC	450
1343	FRAP1	Pr001076290.1	A25	TGTAAAACGACGGCCAGTATGGGTGCTCTTGGGCTGCT	CAGGAAACAGCTATGACTCACGCCCTGGTCCTCTGTC	522
1639	FRAP1	Pr001042279.1	A26	TGTAAAACGACGGCCAGTAACTGTTGGCAGAGGATGGTCAA	CAGGAAACAGCTATGACTGGATCACGAGGTCAGGAATTCAA	611
1651	FRAP1	jhw	A26	TGTAAAACGACGGCCAGTGCAGAGCGAAGCAGATTAGG	CAGGAAACAGCTATGACCAGGGCTGCCAGCGTATC	462
1345	FRAP1	Pr001044172.1	A27	TGTAAAACGACGGCCAGTTCATGAGGGCTGACCACAAGG	CAGGAAACAGCTATGACTGGAATTGGCTGTGGCTTGC	614
1346	FRAP1	Pr001077701.1	A28	TGTAAAACGACGGCCAGTCACTGGTGGAGGAGGCAGGA	CAGGAAACAGCTATGACCCCAAGTCCAGAGCTCAGTCCC	595
1347	FRAP1	Pr001076229.1	A29	TGTAAAACGACGGCCAGTTGGCGGATGATCTCTCGTCG	CAGGAAACAGCTATGACTGCCCTTCTTCAGCGAATTTCT	550
1348	FRAP1	Pr001076293.1	A30	TGTAAAACGACGGCCAGTTGACCTGCTGGCAGTCTTCTGA	CAGGAAACAGCTATGACGGCAGCCATGGAGTCCTGTG	555
1349	FRAP1	Pr001076294.1	A31	TGTAAAACGACGGCCAGTTCAGGTAGAAAGGACAGATGGAAGGTG	CAGGAAACAGCTATGACTGCCAAAGGGAAAGAGCCCA	632
1350	FRAP1	Pr001076295.1	A32	TGTAAAACGACGGCCAGTCCCAAGGCTGTCCTGTCCTAGA	CAGGAAACAGCTATGACCCCAAGCAGCACTCCTCCAG	592
1351	FRAP1	Pr001076296.1	A33	TGTAAAACGACGGCCAGTTCCTGAAGACTGGTAAGTCAGCATCA	CAGGAAACAGCTATGACAGGAAGGGCCACAGAGCAGC	508
1352	FRAP1	Pr001076297.1	A34	TGTAAAACGACGGCCAGTCATGCTGGCCAGACCCAGAG	CAGGAAACAGCTATGACTGCTGCATTTGTGTCCTGCTG	603
1353	FRAP1	Pr001076242.1	A35	TGTAAAACGACGGCCAGTTGCTTTGGCATATGCTCGGC	CAGGAAACAGCTATGACGACAGCACTGGTCTGTATAGCACTGG	551
1354	FRAP1	Pr001076273.1	A36	TGTAAAACGACGGCCAGTTGTCTTTCTCTTTCTTTGTATCCCACA	CAGGAAACAGCTATGACAGGCTTTGTCGAATGCACCC	620
1355	FRAP1	Pr001076274.1	A37	TGTAAAACGACGGCCAGTCCATCCATATTCCAAGGGAGCA	CAGGAAACAGCTATGACGGGAGTCAGCCCATCTGTGG	586
1356	FRAP1	Pr001044757.1	A38	TGTAAAACGACGGCCAGTTGCAGCCAGGCTCATCATTTACA	CAGGAAACAGCTATGACCGGGAGATGGGAAGAAGGATTC	506
1357	FRAP1	Pr001077699.1	A39	TGTAAAACGACGGCCAGTTTCAACCCATCACTCTTAAGAAACAAA	CAGGAAACAGCTATGACAAGCCGTTCATTCCCATCCC	598
1358	FRAP1	Pr001076275.1	A40	TGTAAAACGACGGCCAGTTCAGCACCAAAGGGATGGGA	CAGGAAACAGCTATGACTCCAGCAACGGATTCCTTATCA	623
1359	FRAP1	Pr001077637.1	A41	TGTAAAACGACGGCCAGTTGATAAGGAATCCGTTGCTGGA	CAGGAAACAGCTATGACGAGGAGTTGATCTCGGCGCA	608
1360	FRAP1	Pr001076266.1	A42	TGTAAAACGACGGCCAGTCCTGGAGCAACAGCCCTTCC	CAGGAAACAGCTATGACTGGAAACCCATTCCATAGTTGCC	407
1361	FRAP1	Pr001072474.1	A43	TGTAAAACGACGGCCAGTCAGGACACTGGAGTGAGCTGATTG	CAGGAAACAGCTATGACTGGTTCCTAATAGACCTTGAACTCCCA	619
1362	FRAP1	Pr001076267.1	A44	TGTAAAACGACGGCCAGTAAAGTTGCTACACGAGCCAATATCC	CAGGAAACAGCTATGACCCCTACTTTGCTTGAGGTGCTACTGA	603
1363	FRAP1	Pr001076246.1	A45	TGTAAAACGACGGCCAGTCGGGACTGGTCTATCATGCCA	CAGGAAACAGCTATGACTCATGGTTAGTGTCTTTACTGGAAACC	635
1608	FRAP1	Pr001042430.1	A46	TGTAAAACGACGGCCAGTGGCAAGGATGAGCTAAACTTCTGTTCC	CAGGAAACAGCTATGACTTGGCTAGGCTGGTCTGGAGC	634
1365	FRAP1	Pr001076232.1	A47	TGTAAAACGACGGCCAGTGGCCAACAAAGAGGAATCCTGG	CAGGAAACAGCTATGACTGGCAAGAATCAGAGTCAGGCA	554
1366	FRAP1	Pr001077639.1	A48	TGTAAAACGACGGCCAGTTGCATTGTTGGCTGGGTTCC	CAGGAAACAGCTATGACTGGTGCTTCCCAGCTCTCTCA	470
1367	FRAP1	Pr001076233.1	A49	TGTAAAACGACGGCCAGTTGGCCCTTTGGTCTCCAAGC	CAGGAAACAGCTATGACAGAGGGCCATGGGACATTGG	562
1368	FRAP1	Pr001045933.1	A50	TGTAAAACGACGGCCAGTTGCCATTATAAAGCCAGGGAAACA	CAGGAAACAGCTATGACCCAAGGCGTGTTAGGCATGG	635
1369	FRAP1	Pr001044175.1	A51	TGTAAAACGACGGCCAGTTGCCTAACACGCCTTGGCAG	CAGGAAACAGCTATGACGCAGACCTACCTGTCTACAGCAGCA	458
1370	FRAP1	Pr001076270.1	A52	TGTAAAACGACGGCCAGTGCTGCTACAGAATCAGCTACCCTGTCT	CAGGAAACAGCTATGACGCAAGTCTTCTGTGGCAAGAACCA	626
1371	FRAP1	Pr001067182.1	A53	TGTAAAACGACGGCCAGTTGTGCAAACAACCATGCCTCA	CAGGAAACAGCTATGACTGGGTCCCTTTGAACTGTGCTC	412
1372	FRAP1	Pr001076336.1	A54	TGTAAAACGACGGCCAGTAATGGGCGTAAGCTCCGTGG	CAGGAAACAGCTATGACGTGTTGCCCAGGCTGTTTCG	520
1373	FRAP1	Pr001076272.1	A55	TGTAAAACGACGGCCAGTGCATTGAAATTGGACATGAGACAAAGA	CAGGAAACAGCTATGACCACAGCAGCAGCTGGTACACG	617
1374	FRAP1	Pr001076234.1	A56	TGTAAAACGACGGCCAGTAGGTCGGAATGCAGCCAAGC	CAGGAAACAGCTATGACTGGCCACCCTTCACTTTGGA	622
1375	FRAP1	Pr001077633.1	A57	TGTAAAACGACGGCCAGTCAATGTCTCACACTCTTCCACCTCAA	CAGGAAACAGCTATGACTGGCACTAGGCACTGAGCAGG	631
1376	FRAP1	Pr001076247.1	A58	TGTAAAACGACGGCCAGTCTGCCCTTTAGGCCAGGTGA	CAGGAAACAGCTATGACTCCTAGCTAGAAGAGTGAGCAAGCC	438
1377	FRAP1	Pr001076278.1	A59	TGTAAAACGACGGCCAGTCCTCCGAAGGGCAGCAGACT	CAGGAAACAGCTATGACTTTCCTGGCCAGCATACGCC	547
1378	FRAP1	Pr001044192.1	A60	TGTAAAACGACGGCCAGTGCCCAGGGCTGCTGCTAGA	CAGGAAACAGCTATGACTAGATGCCAGCCCACTCCCA	366
1379	FRAP1	Pr001044136.1	A61	TGTAAAACGACGGCCAGTTGCAGTGGGCACAAAGGTGA	CAGGAAACAGCTATGACACAGTGATTGGGATGGGTTTGG	555
1380	FRAP1	Pr001077634.1	A62	TGTAAAACGACGGCCAGTTGGATGTGACAGGTTGGGTGC	CAGGAAACAGCTATGACGGCTAGGCCGATAGCCCACA	588
1381	FRAP1	Pr001072477.1	A63	TGTAAAACGACGGCCAGTGGGTGGGAGTCAAGGCCTCA	CAGGAAACAGCTATGACCTCGCTGCGATCCGGAGATA	626
1382	FRAP1	Pr001076279.1	A64	TGTAAAACGACGGCCAGTGGACTGTTCAAATAGACAAACCACGC	CAGGAAACAGCTATGACGGTCTCGACTCCTGACCTACGG	635
1647	FRAP1	Pr001044789.1	A65	TGTAAAACGACGGCCAGTAGCGGCTAGCAGAGGTTCGC	CAGGAAACAGCTATGACGTGGCACGATCTCGGTGCAT	608
1506	FRAP1	A1	CNS1	TGTAAAACGACGGCCAGTCCCAGGCTGAATGTCACTG	CAGGAAACAGCTATGACAGCCAGACAAACCACAGGAG	527
1602	FRAP1	A2	CNS2	TGTAAAACGACGGCCAGTCCTCCTAACAGACATTAGCATTCA	CAGGAAACAGCTATGACAGTCAGCCCAGCTCTTCATC	525
1508	FRAP1	A3	CNS3	TGTAAAACGACGGCCAGTTGATTACCCTCTCAAACAAAGGA	CAGGAAACAGCTATGACGCTGGAGTAGAATGTGCTGGT	531
1509	FRAP1	A4	CNS4	TGTAAAACGACGGCCAGTGCTCCCATTCAGCACTCTCT	CAGGAAACAGCTATGACGGACATTCAGAAGCCAAGAAA	735
1652	FRAP1	A5	CNS5	TGTAAAACGACGGCCAGTGCCTGAGTTATGGAAGGAAGG	CAGGAAACAGCTATGACTTCCCCGTTAGTGAAACAGG	527
1511	FRAP1	A6	CNS6	TGTAAAACGACGGCCAGTCATTTTTCAAGCCTGTCCAAA	CAGGAAACAGCTATGACCCATCCTTGCCACAATCCT	735
1512	FRAP1	A7	CNS7	TGTAAAACGACGGCCAGTGAGACAGCTCACAGTTCAATGG	CAGGAAACAGCTATGACGGCCCCAGCTAAGAGGATTA	726
1513	FRAP1	A8	CNS8	TGTAAAACGACGGCCAGTGCTTAAGGTGGTGGCAGTGT	CAGGAAACAGCTATGACGGCCAGTTATCCcATTCCTT	704
1384	KL	Pr001223445.1	A1	TGTAAAACGACGGCCAGTGCCACAATCCTATCTACCCACATCC	CAGGAAACAGCTATGACTAGAGGGACTGCCAGGTGGG	632
1385	KL	Pr001223446.1	A2	TGTAAAACGACGGCCAGTCGACTGTGATTTGAAGTTCACCAGG	CAGGAAACAGCTATGACCGCGGACGTCGGAGAAAGG	590
1386	KL	Pr001223447.1	A3	TGTAAAACGACGGCCAGTTCGGCCAGTCCCTAATTGGC	CAGGAAACAGCTATGACAATTACCTGCGAGCCGGGAC	446
1387	KL	Pr001219154.1	A4	TGTAAAACGACGGCCAGTGGCCTCTTCCAGGGCACCTT	CAGGAAACAGCTATGACTACAGGGTGACCACGGGCTG	448
1388	KL	Pr001223448.1	A5	TGTAAAACGACGGCCAGTCAAGGGTGCGTCCATCTGGG	CAGGAAACAGCTATGACCACCAGGAGGAGGTTGTGCG	606
1389	KL	Pr001223449.1	A6	TGTAAAACGACGGCCAGTCAGCCCGTGGTCACCCTGTA	CAGGAAACAGCTATGACATTCCACGCCTTCCAAGGGA	471
1390	KL	Pr001226353.1	A7	TGTAAAACGACGGCCAGTTGGATAACTACACACTCAACCCAAGG	CAGGAAACAGCTATGACAGTCAGCAGTTCCTTTGATGAACTTT	577
1391	KL	Pr001223439.1	A8	TGTAAAACGACGGCCAGTTTCATAGGCTCATGCCAAAGTCTG	CAGGAAACAGCTATGACTGGCAGGAAATGAGAACTTTACCCA	587
1392	KL	Pr001226354.1	A9	TGTAAAACGACGGCCAGTTCCGCCAATTGGAATCTCCC	CAGGAAACAGCTATGACTGTGCAGAGAGCTAGATATCCTGGG	525
1393	KL	Pr001223650.1	A10	TGTAAAACGACGGCCAGTCATTGGCTTACCAAACGAGAAGCA	CAGGAAACAGCTATGACTGCAGCATTCCAAATTGTGCC	589
1394	KL	Pr001223646.1	A11	TGTAAAACGACGGCCAGTTGGAATATTGTCTTCCTCAGGAGCTG	CAGGAAACAGCTATGACTCTTGAAAGCACAGTCGGGCA	635
1395	KL	Pr001225189.1	A12	TGTAAAACGACGGCCAGTCTGGGCCCTGATTCTCCCTC	CAGGAAACAGCTATGACGCCAGCCAGCCAATGTCAAA	524
1396	KL	Pr001225188.1	A13	TGTAAAACGACGGCCAGTGAGCTCGGCCATCACGTCAA	CAGGAAACAGCTATGACTTCAGCACTTTGCGCAACCC	580
1627	KL	Pr001223647.1	A14	TGTAAAACGACGGCCAGTGCCCTGGCTTGGCATGTGTA	CAGGAAACAGCTATGACCGCAGCTAGGGCTCCTTACCTTT	633
1628	KL	Pr001223648.1	A14	TGTAAAACGACGGCCAGTGTCAGGTGGCGGTAGTGCCC	CAGGAAACAGCTATGACTGCTGTGGAGCCATCCAAGA	477
1662	KL	Pr001223649.1	A15 (X5.1)	TGTAAAACGACGGCCAGTCAGCTCCGAGGTTTGGCCTC	CAGGAAACAGCTATGACAAATGTTGCATTGGTGTGGTTCC	612
1399	KL	Pr001226350.1	A16	TGTAAAACGACGGCCAGTCAGTTTGAGCCCAAGGCATCC	CAGGAAACAGCTATGACTGTTGCATTGGTGTGGTTCCT	572
1400	KL	Pr001223645.1	A17	TGTAAAACGACGGCCAGTCATCAGCTGTTAACCATTTGCACC	CAGGAAACAGCTATGACCCAGCCTAGGACCCTCTGTCG	518
1401	KL	Pr001223643.1	A18	TGTAAAACGACGGCCAGTGGAACCACACCAATGCAACATTT	CAGGAAACAGCTATGACTTCCTCCACCTAGAGCCACTGC	589
1402	KL	Pr001223644.1	A19	TGTAAAACGACGGCCAGTCGACAGAGGGTCCTAGGCTGG	CAGGAAACAGCTATGACCCTCAGAGATCACAGAAACAAATCCA	617
1403	KL	Pr001223351.1	A20	TGTAAAACGACGGCCAGTGGGCTCTTCAGGAAGCATAAAGCA	CAGGAAACAGCTATGACCACTATGACCCTGTGTCAGTGAGGTTG	631
1404	KL	Pr001223312.1	A21	TGTAAAACGACGGCCAGTTGTATCAGGCAAGATAAACCAATGTCA	CAGGAAACAGCTATGACCAAACGGGAACGGTTAAGTTGTGA	534
1405	KL	Pr001223313.1	A22	TGTAAAACGACGGCCAGTTCACAACTTAACCGTTCCCGTTTG	CAGGAAACAGCTATGACTACCATCTTCCAGCCGCGTG	356
1532	KL	A1	X1	TGTAAAACGACGGCCAGTGGGAGAAACAGGTGCCTTTC	CAGGAAACAGCTATGACGCGGAAGACGTTGTTGTAGC	708
1533	KL	A2	CNS 1	TGTAAAACGACGGCCAGTCATGTGCCTATGTGGCAGAC	CAGGAAACAGCTATGACACCCGTACACGTGTGTTGAA	716
1534	KL	A3	CNS 3	TGTAAAACGACGGCCAGTTGGAAGCAAATAAATGGATCA	CAGGAAACAGCTATGACCACACCGAGAAAGGTCATTG	600
1535	KL	A4	CNS 4	TGTAAAACGACGGCCAGTCACCACACAGTAGCAGTGACTTT	CAGGAAACAGCTATGACAGGGGAAGAGGAATCAAGGA	623
1606	KL	A5	CNS 5	TGTAAAACGACGGCCAGTTGCCTGTACTGAAATGAACCA	CAGGAAACAGCTATGACGCTTTGCATCCATAAAACCAA	435
1537	KL	A6	CNS 6	TGTAAAACGACGGCCAGTTTTTCCTCCAGAAATGATACCC	CAGGAAACAGCTATGACTCAAAATCACAAAATCATTCCTTC	633
1538	KL	A7	CNS 7.1	TGTAAAACGACGGCCAGTAGACCAGGCTCAAAATGACC	CAGGAAACAGCTATGACTCATAAAAATTAATGAGCCTTCAA	613
1539	KL	A8	CNS 7.2	TGTAAAACGACGGCCAGTACATTTTCATAGAATACCCTTGGT	CAGGAAACAGCTATGACTGATTCACATGGAAAACCAACT	599
1540	KL	A9	CNS 8	TGTAAAACGACGGCCAGTCCTAAAAGGCCTTCTCAGTCA	CAGGAAACAGCTATGACTCAGAAAACCAACCCGTTCT	527
1406	CDKN2A	Pr001295892.1	A1	TGTAAAACGACGGCCAGTTGCCAGGAGTTGGAGGCAAG	CAGGAAACAGCTATGACCAGATCACGCGAGGTTTGGG	523
1407	CDKN2A	Pr001307682.1	A2	TGTAAAACGACGGCCAGTGGCAGCAGTCATTCGCAACC	CAGGAAACAGCTATGACGCCTCCGGAAGCTGTCGACTT	629
1408	CDKN2A	Pr001305789.1	A3	TGTAAAACGACGGCCAGTCGATGCTGTCTTCCATGCGAT	CAGGAAACAGCTATGACTGACCTCAGGTTTCTAACGCCTGT	632
1564	CDKN2A	Pr001307090.1		TGTAAAACGACGGCCAGTTTGTCATGAAGTCGACAGCTTCC	CAGGAAACAGCTATGACCACGTGAAGCCATTGCGAGA	543
1410	CDKN2A	Pr001305790.1	A5	TGTAAAACGACGGCCAGTGAGACTCAGGCCGTCCCACC	CAGGAAACAGCTATGACTGGAAACTGGAAGCAAATGTAGGG	632
1411	CDKN2A	Pr001307680.1	A6	TGTAAAACGACGGCCAGTGCTTTGGAAGCTCTCAGGGTACA	CAGGAAACAGCTATGACTCTGCCTGTGACGACAGCTCC	624
1412	CDKN2A	Pr001307679.1	A7	TGTAAAACGACGGCCAGTCACCACAGATTTCCACTGATAATCCC	CAGGAAACAGCTATGACGGTAGAGGGTCTGCAGCGGG	467
1413	CDKN2A	Pr001296551.1	A8	TGTAAAACGACGGCCAGTCGCCAGGAGGAGGTCTGTGA	CAGGAAACAGCTATGACCCACATTCGCTAAGTGCTCGGA	593
1414	CDKN2A	Pr001295643.1	A9	TGTAAAACGACGGCCAGTCCTCCGACCCTGTCCCTCAA	CAGGAAACAGCTATGACGGTGATTTCGATTCTCGGTGGG	525
1415	CDKN2A	Pr001303982.1	A10	TGTAAAACGACGGCCAGTTTCGCCTCAGTTTCCCACGA	CAGGAAACAGCTATGACAGGAGTGGCGCTGCTCACC	533
1416	CDKN2A	Pr001304996.1	A11	TGTAAAACGACGGCCAGTCCCACCCGGACCTCCAAGAT	CAGGAAACAGCTATGACCAGAGGCGTGCAGCGGTTTA	592
1562	CDKN2A	Pr001307678.1		TGTAAAACGACGGCCAGTCTGGAACGCAACTCCAGGCA	CAGGAAACAGCTATGACGAGGAAGAAGCGCTCAGATGCTC	615
1418	CDKN2A	Pr001295891.1	A13	TGTAAAACGACGGCCAGTGGCTGGGACAAGCACCGAGT	CAGGAAACAGCTATGACCGAGAGCCGAGCCTCGCTTA	552
1566	CDKN2A	A1 jhw	CNS	TGTAAAACGACGGCCAGTTGCATGGAGTAAAATTCAAAGTG	CAGGAAACAGCTATGACTGTGTGTGTTGTAATAAGGGGTTT	623
1567	CDKN2A	A2 jhw	X1	TGTAAAACGACGGCCAGTGGCTCCTCAGTAGCATCAGC	CAGGAAACAGCTATGACGTAGGCGGGAGGGAGAGG	525
1568	CDKN2A	A3 jhw	alt prom	TGTAAAACGACGGCCAGTGGGAAAGTATGGCTTCTTCTTTT	CAGGAAACAGCTATGACCCAGTCCTCAAAGCGGATAA	735
1419	TRDMT1	Pr001287168.1	A1	TGTAAAACGACGGCCAGTTGCCTGCCACTGAGGATTGTC	CAGGAAACAGCTATGACGGAAGACGGTGATTCTTGCCC	592
1420	TRDMT1	Pr001287169.1	A2	TGTAAAACGACGGCCAGTTCCAAATATCAGGAAACAGAATTTCCA	CAGGAAACAGCTATGACGGGAAGCTGTAAGCCAGCCC	633
1421	TRDMT1	Pr001286578.1	A3	TGTAAAACGACGGCCAGTTGTTGCTCAACCGAATGTGGG	CAGGAAACAGCTATGACTCCGTGCATGCAGTGGAATAGT	629
1422	TRDMT1	Pr001278396.1	A4	TGTAAAACGACGGCCAGTTTGCAGTGGCATTAAGTACACTCACAC	CAGGAAACAGCTATGACTGGATAAATTGGAAGTTTGTGCATTG	549
1423	TRDMT1	Pr001286579.1	A5	TGTAAAACGACGGCCAGTTGGGATGACACTTGGGCTGC	CAGGAAACAGCTATGACGTTGAATTTGCCTTTGCACGC	633
1424	TRDMT1	Pr001287260.1	A6	TGTAAAACGACGGCCAGTTCCAAGAGGTCTGCTGAGGAAGA	CAGGAAACAGCTATGACCCATGAAGCGGCCACAGAAA	383
1425	TRDMT1	Pr001278408.1	A7	TGTAAAACGACGGCCAGTCCCTTCTAGCCATGCCAACCTC	CAGGAAACAGCTATGACTTTGCCCTGTGCACTTTGCC	545
1426	TRDMT1	Pr001287255.1	A8	TGTAAAACGACGGCCAGTTGTGTGCTGCAAAGGAGGGC	CAGGAAACAGCTATGACCATCAGGTGCTGCATAATTGTTGTG	482
1427	TRDMT1	Pr001287256.1	A9	TGTAAAACGACGGCCAGTGCACATAATGTTCTGCCAAACGG	CAGGAAACAGCTATGACTGGCAGCATACAGTGTTCTGGAAA	467
1428	TRDMT1	Pr001287252.1	A10	TGTAAAACGACGGCCAGTTGAAGATGGACCTAGGGCATGG	CAGGAAACAGCTATGACTTTGTTGTTGCTGTTTAACTTGGTGC	357
1429	TRDMT1	Pr001287253.1	A11	TGTAAAACGACGGCCAGTTGAGAAATGCCATTCTTACCAACCA	CAGGAAACAGCTATGACGAGGCTCTGTGTGAACCCATGC	617
1430	TRDMT1	Pr001278391.1	A12	TGTAAAACGACGGCCAGTGGCTGTGATTCCCTGTCACTCA	CAGGAAACAGCTATGACTCCCGAACTCCTGGCCTCAC	596
1431	TRDMT1	Pr001286519.1	A13	TGTAAAACGACGGCCAGTTGCTGCCCGTGACTTGTTCC	CAGGAAACAGCTATGACGGTGTGATACAGGCCAGATGTGC	577
1432	TRDMT1	Pr001287248.1	A14	TGTAAAACGACGGCCAGTTCGAAGTTCAATATCACCACAGAACCA	CAGGAAACAGCTATGACTCACTTCATGCCTGGCTTCCC	601
1433	TRDMT1	Pr001278404.1	A15	TGTAAAACGACGGCCAGTGGGAGTCAGCGTCTGGAGGG	CAGGAAACAGCTATGACTTCACTTGGAAACCAAGGCAGTTT	630
1434	TRDMT1	Pr001287249.1	A16	TGTAAAACGACGGCCAGTTGAGAGGAAGGAGCCTCAAACCC	CAGGAAACAGCTATGACTCCACCAGCCCTCCCACTCT	633
1435	TRDMT1	Pr001287250.1	A17	TGTAAAACGACGGCCAGTCATTGCAACTCCTAGGTCTCCCTCA	CAGGAAACAGCTATGACTCTTCTCTCTTATGAGCCTTCGGGA	452
1436	TRDMT1	Pr001287246.1	A18	TGTAAAACGACGGCCAGTATGGAAGCATCTGTAGATATTAGGCCC	CAGGAAACAGCTATGACTTCCAAGCCCAGTGCCTTCA	569
1437	TRDMT1	Pr001287247.1	A19	TGTAAAACGACGGCCAGTCGAAAGCAAATCCCGAAGGC	CAGGAAACAGCTATGACTGGCATAAGCAGGGTGTCCTCA	597
1438	TRDMT1	Pr001286556.1	A20	TGTAAAACGACGGCCAGTTTGAAGGCACTGGGCTTGGA	CAGGAAACAGCTATGACGGCTTATTGCCCATGGATCAGG	498
1569	TRDMT1	jhw A1	Prom 1.1	TGTAAAACGACGGCCAGTAGGGGCCTTGATTGGAAA	CAGGAAACAGCTATGACTCCTTCCCCTTTTTGAGTTG	735
1570	TRDMT1	jhw A2	Prom 1.2	TGTAAAACGACGGCCAGTAGAGGCTCATGTTGACGAAAA	CAGGAAACAGCTATGACCCGACATAACAGACTCTTCTTAGC	732
1571	TRDMT1	jhw A3	X6	TGTAAAACGACGGCCAGTTTTGGGAAGGAAGACCCATA	CAGGAAACAGCTATGACTTCACTTAAAATGAGGTTTTGTGG	676
1572	TRDMT1	jhw A4	X8	TGTAAAACGACGGCCAGTCTGGTTCACGTCAGTGTCATC	CAGGAAACAGCTATGACTCTTTTAATGGCAACCCCATA	409
1573	TRDMT1	jhw A5	X9	TGTAAAACGACGGCCAGTAAAACATAAAACATTCCTTGTGCAT	CAGGAAACAGCTATGACGCCCATTGATGAGACGTTTA	518
1574	TRDMT1	jhw A6	X11.1	TGTAAAACGACGGCCAGTCTACATTCCTCAGCGTGCAA	CAGGAAACAGCTATGACTTCTGTTTTGAACTAATTCTGGTGA	732
1575	TRDMT1	jhw A7	X11.2	TGTAAAACGACGGCCAGTTGCCTGTTATGACACTTCACA	CAGGAAACAGCTATGACACCGCTGTGCCCTTACTAAA	574
1576	TRDMT1	jhw A8	CNS 1	TGTAAAACGACGGCCAGTTCTTGTGTAGTTATTAATGTGGGAAAA	CAGGAAACAGCTATGACACTCCGAACCTCAAATGGTG	605
1577	TRDMT1	jhw A9	CNS 2	TGTAAAACGACGGCCAGTTTGGAAACCTTGGGCATATATTA	CAGGAAACAGCTATGACTGCTTTACCAAAGGGTAGGTTT	535
1439	DNMT3A	Pr001450880.1	A1	TGTAAAACGACGGCCAGTACTGCAGCCTTTGGAGATGACC	CAGGAAACAGCTATGACTGGTGCTTTCAAACAGCGAGATG	607
1440	DNMT3A	Pr001450879.1	A2	TGTAAAACGACGGCCAGTGGGCCCGACCACCTCATCTA	CAGGAAACAGCTATGACGCCTGATCAGATAGGAGCACAAGC	568
1441	DNMT3A	Pr001450881.1	A3	TGTAAAACGACGGCCAGTGGTTTCCTGTGTGGTAGGCACC	CAGGAAACAGCTATGACGAGGCGGAAATACCGGAGGG	631
1442	DNMT3A	Pr001450883.1	A4	TGTAAAACGACGGCCAGTGCTGCAATAACCTTCTTGTTTCAGTCA	CAGGAAACAGCTATGACGTGGTTAGACGGCTTCCGGG	623
1443	DNMT3A	Pr001450884.1	A5	TGTAAAACGACGGCCAGTCAAGGCAAAGCCCTCCGGTA	CAGGAAACAGCTATGACTTGGTGATCTGAGTGCCGGG	559
1444	DNMT3A	Pr001450874.1	A6	TGTAAAACGACGGCCAGTTGCCATGTTGGGAAATGCTTG	CAGGAAACAGCTATGACGCTCCTGCCCTGCGAACTCT	465
1445	DNMT3A	Pr001450875.1	A7	TGTAAAACGACGGCCAGTGCATGACCCTGCACCGTCTC	CAGGAAACAGCTATGACTGTGTTCGTGTGTTTGCGGG	426
1446	DNMT3A	Pr001450877.1	A8	TGTAAAACGACGGCCAGTGGCTCGGGACACATCACCAA	CAGGAAACAGCTATGACAGCCCAGTGTGTGGCTCCTG	558
1447	DNMT3A	Pr001450872.1	A9	TGTAAAACGACGGCCAGTGGGCTTCCCAAACAGGCCC	CAGGAAACAGCTATGACACAGCAGGCCCATCACGTTG	634
1448	DNMT3A	Pr001450209.1	A10	TGTAAAACGACGGCCAGTGGGAAGACAGGGTCATCGGG	CAGGAAACAGCTATGACCCACTTGGGTCACCTTCCCA	506
1449	DNMT3A	Pr001450443.1	A11	TGTAAAACGACGGCCAGTCAAATTCCCATTTCAATTTGCCC	CAGGAAACAGCTATGACCCAGATAGGCCAAACGAGGCA	591
1450	DNMT3A	Pr001450444.1	A12	TGTAAAACGACGGCCAGTTCCACTTCACACACAAGCTTCCC	CAGGAAACAGCTATGACTTGCGTGGAGTGTGTGGACC	618
1451	DNMT3A	Pr001450011.1	A13	TGTAAAACGACGGCCAGTCCAAGGCTCAGCCAAGGGAG	CAGGAAACAGCTATGACTTCTGACCCTTCCCGCTGCT	610
1452	DNMT3A	Pr001450417.1	A14	TGTAAAACGACGGCCAGTCCTGGAATGGAAAGACCGGG	CAGGAAACAGCTATGACGAAGGCCCAAGGTGGTGGTG	540
1453	DNMT3A	Pr001450418.1	A15	TGTAAAACGACGGCCAGTGCACGGCAACCCTGCTACAC	CAGGAAACAGCTATGACTGATGGCGTTCGAGACTGGG	602
1454	DNMT3A	Pr001450445.1	A16	TGTAAAACGACGGCCAGTCAGTGCACGAAGCACGGTGA	CAGGAAACAGCTATGACCCGTAGAGTTGGGAGGTGGGA	592
1455	DNMT3A	Pr001437320.1	A17	TGTAAAACGACGGCCAGTGGAGGAGGAAAGCAGGTGCC	CAGGAAACAGCTATGACTCCTCCTCAGCGGTTCCTCC	626
1456	DNMT3A	Pr001450439.1	A18	TGTAAAACGACGGCCAGTGCTGAGGAGGAGCGGGATGT	CAGGAAACAGCTATGACCTGCCTGTGGTGGGTGGAAG	612
1457	DNMT3A	Pr001450440.1	A19	TGTAAAACGACGGCCAGTCTTCCACCCACCACAGGCAG	CAGGAAACAGCTATGACCGCTCGCTCTCTCCACCTGA	526
1458	DNMT3A	Pr001450419.1	A20	TGTAAAACGACGGCCAGTGGGTCAGGTGGAGAGAGCGA	CAGGAAACAGCTATGACGAAGGCTGGAATTGTGTGACTTGA	574
1459	DNMT3A	Pr001450420.1	A21	TGTAAAACGACGGCCAGTCCCAGCACATGCTCAAACACC	CAGGAAACAGCTATGACTCCAGGTTGCTTGCTCATCCTC	613
1460	DNMT3A	Pr001449821.1	A22	TGTAAAACGACGGCCAGTGGCTTCCAGGAACTCGCAGG	CAGGAAACAGCTATGACCCCAAGACGGGCAGCTACTTC	602
1461	DNMT3A	Pr001450012.1	A23	TGTAAAACGACGGCCAGTGCAGGAACCGTATACGCCCA	CAGGAAACAGCTATGACCTCGCTCCTCCAGCCCACAC	557
1462	DNMT3A	Pr001450421.1	A24	TGTAAAACGACGGCCAGTGATGAGCCGGCTGCCTTGTT	CAGGAAACAGCTATGACTGACAGGCCAGAAACCCAGC	545
1463	DNMT3A	Pr001450425.1	A25	TGTAAAACGACGGCCAGTACCCGTCTCCGCACCAAGTC	CAGGAAACAGCTATGACAGCAATTTCAGGGCCAACCG	619
1464	DNMT3A	Pr001450426.1	A26	TGTAAAACGACGGCCAGTACTCATTTCATCATACACGCTTGGAA	CAGGAAACAGCTATGACTGCCTCCCTGAGTGCAGAGG	432
1465	DNMT3A	Pr001450427.1	A27	TGTAAAACGACGGCCAGTCCTGAAATTGCTGGCTTAACCTGA	CAGGAAACAGCTATGACAGGTCTGCTTGCCAAGGCTATG	634
1466	DNMT3A	Pr001436913.1	A28	TGTAAAACGACGGCCAGTTGGCACGTGGGAGAGTAAGCA	CAGGAAACAGCTATGACTGGAGAAGCGGAGTGAGCCC	635
1467	DNMT3A	Pr001452322.1	A29	TGTAAAACGACGGCCAGTCCATCCTTCCTGGGACCTGC	CAGGAAACAGCTATGACGGGTCAAGCCCAGGAATCCTTT	595
1601	DNMT3A	Pr001450228.1	X4	TGTAAAACGACGGCCAGTCACTGCCATCGACAGGCCA	CAGGAAACAGCTATGACAGCCTCATCAGGCAGGAGGG	434
1646	DNMT3A		A31	TGTAAAACGACGGCCAGTACCCTGTCGTGAGCACTGAG	CAGGAAACAGCTATGACGTGAGGCCAGAAGGAGGAG	528
1470	DNMT3A	Pr001450013.1	A32	TGTAAAACGACGGCCAGTCGCTACCTGGCGCTGCTTCT	CAGGAAACAGCTATGACGTGAGGGCGGTGTGTAGGCA	546
1471	DNMT3A	Pr001437536.1	A33	TGTAAAACGACGGCCAGTTACAGGGCCAAGGTCGGAGC	CAGGAAACAGCTATGACCCCACCACCAACTCCAGCAA	633
1599	DNMT3A	jhw A14	prom.1	TGTAAAACGACGGCCAGTCCGTACCTTGAGGTGTCCAA	CAGGAAACAGCTATGACCCACCAACTCCAGCAATCC	535
1600	DNMT3A	jhw A15	prom.2	TGTAAAACGACGGCCAGTCAGCTCTGCACCCCGAAT	CAGGAAACAGCTATGACAGAGCACTGGGAGTCTCTGG	529
1473	DNMT3A	Pr001452309.1	A35	TGTAAAACGACGGCCAGTTTGCTGGAGTTGGTGGTGGG	CAGGAAACAGCTATGACCAAGCTGGGTGCGCCATTTA	565
1621	DNMT3A	A1	X1	TGTAAAACGACGGCCAGTACTCAGAGCCCCTCGAGTC	CAGGAAACAGCTATGACCCAACTGAGGACACCCAACT	508
1623	DNMT3A	A2	X2	TGTAAAACGACGGCCAGTCCGCGGCATTGTATAGACTT	CAGGAAACAGCTATGACAGAGAGGGAGCGCGACAG	543
1588	DNMT3A	jhw A3	X8	TGTAAAACGACGGCCAGTGGCCAGCACTAAGTCAGCAT	CAGGAAACAGCTATGACGCGCTAATCTCTTCCAGAGC	631
1589	DNMT3A	jhw A4	aP.1	TGTAAAACGACGGCCAGTTGTCTAGGACTCCAGGTCACG	CAGGAAACAGCTATGACCCCGCTTCTCTATTCACCTG	607
1590	DNMT3A	jhw A5	aP.2	TGTAAAACGACGGCCAGTCAGACGGAGAGTGACAGCAG	CAGGAAACAGCTATGACGACCTCTTTTGTCATCCATGC	631
1591	DNMT3A	jhw A6	CNS 2	TGTAAAACGACGGCCAGTCACACATAGATGCACACACAGAG	CAGGAAACAGCTATGACTTGTTGATGCTGCCAAGAAG	722
1592	DNMT3A	jhw A7	CNS 3	TGTAAAACGACGGCCAGTGGGAAGTGTGCCAGGTGAG	CAGGAAACAGCTATGACAGCTGGGACAAACTCCTCCT	622
1593	DNMT3A	jhw A8	CNS 4	TGTAAAACGACGGCCAGTGTTCCCTGACTTCCCCATTT	CAGGAAACAGCTATGACGGCAGCCTCTAAGGATGTTG	515
1594	DNMT3A	jhw A9	CNS 5	TGTAAAACGACGGCCAGTAGTTCCAAGTTGGGGAATGG	CAGGAAACAGCTATGACGCTTCTGGAGAGCCCCTTAC	635
1595	DNMT3A	jhw A10	CNS 7.1	TGTAAAACGACGGCCAGTAAAGCCTTGGTTTGGTTTTG	CAGGAAACAGCTATGACCCAAGTCCACGTCCCTAGAA	704
1596	DNMT3A	jhw A11	CNS 7.2	TGTAAAACGACGGCCAGTCTCCTGTGTATGCGTGTGAGA	CAGGAAACAGCTATGACCCTTCTGGGCTTGTCACTCT	635
1597	DNMT3A	jhw A12	CNS 8	TGTAAAACGACGGCCAGTGGGTCAAAGCGAAATCGTC	CAGGAAACAGCTATGACCTTACTCACTTCCCCCACCA	623
1626	DNMT3A	A13	CNS9	TGTAAAACGACGGCCAGTTGCTCACACAGGTGACGTTT	CAGGAAACAGCTATGACCCAGCCCTCTTTCCTTTCTC	664
1474	DNMT3B	Pr001117762.1	A1	TGTAAAACGACGGCCAGTGCCCATAAGGCAGGAAACCC	CAGGAAACAGCTATGACTCCACGCAGTAAACTAAGGACAGGA	634
1475	DNMT3B	Pr001111133.1	A2	TGTAAAACGACGGCCAGTTGTCCAGGTGTAGGGAACAGCG	CAGGAAACAGCTATGACCCAGCGGGTCTCTGGCTACC	450
1476	DNMT3B	Pr001111657.1	A3	TGTAAAACGACGGCCAGTGCGTGGAGACAGACCACAAGC	CAGGAAACAGCTATGACCGGGCCAGTGAAATCACCC	590
1477	DNMT3B	Pr001110542.1	A4	TGTAAAACGACGGCCAGTAAGGAAGGGAGGAAGGGCGA	CAGGAAACAGCTATGACGGGACGAGGGAAATTTGAAATCG	418
1478	DNMT3B	Pr001117764.1	A5	TGTAAAACGACGGCCAGTAGTGAGCGACAGGCCAGCAG	CAGGAAACAGCTATGACTGTGGGAGAAGCCAGAATGGG	634
1479	DNMT3B	Pr001111510.1	A6	TGTAAAACGACGGCCAGTCTTGGGCAAGAGCATCACCC	CAGGAAACAGCTATGACTGGCAGAGGACAGGGAACCA	573
1480	DNMT3B	Pr001111242.1	A7	TGTAAAACGACGGCCAGTTGCTGGAAGGAATCGGAGGG	CAGGAAACAGCTATGACGCAATGTAACTGATCGTCCAGATTGAA	542
1481	DNMT3B	Pr001117766.1	A8	TGTAAAACGACGGCCAGTGAGTGACCCGGTCTCCCTGC	CAGGAAACAGCTATGACCCCTCCAACAATAGTCCAAGAGCC	427
1482	DNMT3B	Pr001117767.1	A9	TGTAAAACGACGGCCAGTACCTGCTGGGAATTGTCGGG	CAGGAAACAGCTATGACGAAGCCAACAGGCTTACGGGA	574
1483	DNMT3B	Pr001111473.1	A10	TGTAAAACGACGGCCAGTTTTCTTCAGCGGTCTCTGTTCTCTTT	CAGGAAACAGCTATGACGGTCCGTGGTGCATATGGAAG	563
1484	DNMT3B	Pr001117769.1	A11	TGTAAAACGACGGCCAGTACCACGGTGTCTGGCTACAT	CAGGAAACAGCTATGACTTGCTCACGTGGCCACTCCT	586
1485	DNMT3B	Pr001117770.1	A12	TGTAAAACGACGGCCAGTCACCAGGGACACCTGCTTGG	CAGGAAACAGCTATGACTTTGTTGGGAGGCCCAATCC	634
1486	DNMT3B	Pr001117771.1	A13	TGTAAAACGACGGCCAGTCCTTCCGAGGCCTCTCCCTG	CAGGAAACAGCTATGACTGGCACAGCCTTCGTATGCC	532
1487	DNMT3B	Pr001117773.1	A14	TGTAAAACGACGGCCAGTGCTCCTGTTGTGAGTTGCCCA	CAGGAAACAGCTATGACCAGGGTCCAGAAATAGGCCTTGG	631
1488	DNMT3B	Pr001117774.1	A15	TGTAAAACGACGGCCAGTGCAAAGAGTCCTTGGCAAGCTG	CAGGAAACAGCTATGACGGCCCTCGCAGCACACAGT	630
1489	DNMT3B	Pr001110603.1	A16	TGTAAAACGACGGCCAGTCCCAGCTGCCTTGCACTCTG	CAGGAAACAGCTATGACCTGTGTGCTGCTTCCAGGGC	500
1490	DNMT3B	Pr001117749.1	A17	TGTAAAACGACGGCCAGTGAAGACGTCAGGGAAGCCCG	CAGGAAACAGCTATGACTTCGCCAGGTCTCTCAGCCA	533
1491	DNMT3B	Pr001117750.1	A18	TGTAAAACGACGGCCAGTTGCCAAATGCAGGCTCGTGT	CAGGAAACAGCTATGACTGCAAGGTGGTTGAGAAGGTGG	478
1492	DNMT3B	Pr001117751.1	A19	TGTAAAACGACGGCCAGTTGGTGCGTGTACAGCCTTTGC	CAGGAAACAGCTATGACGTCACCAACTCCACTTCTGACCCT	493
1493	DNMT3B	Pr001117752.1	A20	TGTAAAACGACGGCCAGTTTAGGGTCAGAAGTGGAGTTGGTGA	CAGGAAACAGCTATGACTGGCCAGAAGCAAGTGGCTC	618
1494	DNMT3B	Pr001117754.1	A21	TGTAAAACGACGGCCAGTTCAGGAGGCCATTGGGAACC	CAGGAAACAGCTATGACTCTAGCCAGACCAAGAACGGGA	403
1495	DNMT3B	Pr001117755.1	A22	TGTAAAACGACGGCCAGTTAGCCAGCCTCCTGATGGCA	CAGGAAACAGCTATGACATCAACCCGCACGACCACAG	421
1496	DNMT3B	Pr001117756.1	A23	TGTAAAACGACGGCCAGTCCATCCTTGGCTTTGGCACA	CAGGAAACAGCTATGACGGGAAGCCCAACACCAGGAA	410
1497	DNMT3B	Pr001110553.1	A24	TGTAAAACGACGGCCAGTTGGCATTTGTGGGAAGCACA	CAGGAAACAGCTATGACCAGATGGTGTGGCCTAATGACCTC	630
1498	DNMT3B	Pr001117757.1	A25	TGTAAAACGACGGCCAGTGGGCTCTGAATTTAGGTCCTTGGG	CAGGAAACAGCTATGACGCCACGTTGCTACCTACTTCAAGTTT	608
1499	DNMT3B	Pr001117758.1	A26	TGTAAAACGACGGCCAGTCCAGGCCCTGCTCTTCCTCA	CAGGAAACAGCTATGACTGACGTCATCCCTGCTGAAATC	617
1500	DNMT3B	Pr001117759.1	A27	TGTAAAACGACGGCCAGTCAGACGTGTGCAGTTGTAGGCAT	CAGGAAACAGCTATGACTCCCTGACTGCTGTCACTGCC	588
1501	DNMT3B	Pr001117760.1	A28	TGTAAAACGACGGCCAGTCAAGGGCTGGAGTCTGCACG	CAGGAAACAGCTATGACTGCAGCTTGTCTGAATTCCCG	604
1502	DNMT3B	Pr001117761.1	A29	TGTAAAACGACGGCCAGTCCCAGATGAGAAGTCTGCTACCCTC	CAGGAAACAGCTATGACCCTGACATGTTAGCCAGGCCC	630
1503	DNMT3B	Pr001110544.1	A30	TGTAAAACGACGGCCAGTAGCTCGGTGCTCCCTTTGGA	CAGGAAACAGCTATGACACAGGCGTGAGCCAATGGTG	620
1554	DNMT3B	A1	X1	TGTAAAACGACGGCCAGTCGATTTCAAATTTCCCTCGT	CAGGAAACAGCTATGACCGTGGACGTTTCCTCACC	675
1555	DNMT3B	A2	X10	TGTAAAACGACGGCCAGTCCAGGACTTGTCTTACAATCCATA	CAGGAAACAGCTATGACAGTGGGGAGGGAGTTCAGAT	579
1557	DNMT3B	A4	CNS1	TGTAAAACGACGGCCAGTCAATTTCACCTCTAGTTTTTCATCC	CAGGAAACAGCTATGACTGCTCAACAAATACCTACTACTGGA	629
1558	DNMT3B	A5	CNS2	TGTAAAACGACGGCCAGTCTGGCCAGGCTCTGTGTACT	CAGGAAACAGCTATGACCAAGCCCAGTCCACCTCTAGT	517
1559	DNMT3B	A6	CNS4	TGTAAAACGACGGCCAGTTAGGGAGTTGGCAGGAAGAA	CAGGAAACAGCTATGACGGGCTAAGGACTGGTGTGTG	634
1560	DNMT3B	A7	CNS5	TGTAAAACGACGGCCAGTCCTTCCTGCATTGTGAGGTT	CAGGAAACAGCTATGACTCACCCAGAGAAGTGGCAGT	610
1561	DNMT3B	A8	CNS6	TGTAAAACGACGGCCAGTCTGTGTGCCCATAATGTTGC	CAGGAAACAGCTATGACGACTGCTCTGTGCAATTAGCC	625
1143	BECN1	BECN1_exon1&2	BECN1_exon1&2	TGTAAAACGACGGCCAGTagcctccccattctctgc	CAGGAAACAGCTATGACgccaccataagaattatatcacca	827
1144	BECN1	BECN1_exon3	BECN1_exon3	TGTAAAACGACGGCCAGTtcagatgccctcctgcttt	CAGGAAACAGCTATGACgccaagtagcctgcagaaac	269
1145	BECN1	BECN1_exon4	BECN1_exon4	TGTAAAACGACGGCCAGTgaggctgtttgggagatgaa	CAGGAAACAGCTATGACgccaaaaggctaggtgatga	284
1146	BECN1	BECN1_exon5&6&7	BECN1_exon5&6&7	TGTAAAACGACGGCCAGTagtaggtggaggaagcctct	CAGGAAACAGCTATGACggaagccatttcctctcctg	814
1147	BECN1	BECN1_exon8	BECN1_exon8	TGTAAAACGACGGCCAGTcgttcatagtgtggtgagagaga	CAGGAAACAGCTATGACacccaggcttagtggtcaac	327
1148	BECN1	BECN1_exon9	BECN1_exon9	TGTAAAACGACGGCCAGTggtgagagtgggaaatgtcaa	CAGGAAACAGCTATGACtggacagcagtaccaggttg	334
1149	BECN1	BECN1_exon10	BECN1_exon10	TGTAAAACGACGGCCAGTccttggccagaatgaagagt	CAGGAAACAGCTATGACgccaatatcaaagcaaacca	277
1150	BECN1	BECN1_exon11	BECN1_exon11	TGTAAAACGACGGCCAGTtgggaacaatctctggaagc	CAGGAAACAGCTATGACtgctgcttcaattctgttcaa	306
1151	BECN1	BECN1_exon12a	BECN1_exon12a	TGTAAAACGACGGCCAGTcctgccccgaacttacttaac	CAGGAAACAGCTATGACtttttcagagaagaaagggaaa	528
1152	BECN1	BECN1_exon12b	BECN1_exon12b	TGTAAAACGACGGCCAGTccagagctacaacatgccatc	CAGGAAACAGCTATGACcagaatttccacatacctgcat	586
1658	BECN1		P3	TGTAAAACGACGGCCAGTGCTTGAAGAAGGTGAGGAAGG	CAGGAAACAGCTATGACTTCAAAGTGAAAGCCAGAGC	264
1524	BECN1	Pr001153638.1	Prom 4	TGTAAAACGACGGCCAGTTGGCTAGAAGATGGGCAACGA	CAGGAAACAGCTATGACCCTGTGGTCCCTGCTACACTGG	635
1525	BECN1	Pr001153632.1	Prom 5	TGTAAAACGACGGCCAGTTTGCCCAACTATCACCATAATCCAG	CAGGAAACAGCTATGACGCAGAAGCCTGGGCAACAAA	526
1526	BECN1	Pr001153663.1	Prom 6	TGTAAAACGACGGCCAGTCCAGTGTAGCAGGGACCACAGG	CAGGAAACAGCTATGACAGTTCAGCCTTACCAGCAATCAATG	618
1527	BECN1	A1	Prom 1	TGTAAAACGACGGCCAGTGACCGGACGTGACGCTAC	CAGGAAACAGCTATGACTTTCCTACCCCAGCCTCCT	730
1528	BECN1	A2	Prom 2	TGTAAAACGACGGCCAGTTCCCAGCTTAATCCCAGCTA	CAGGAAACAGCTATGACTGCTAATCCCCAAACAGGTA	635
1529	BECN1	A3	CNS1	TGTAAAACGACGGCCAGTAAAGGGTAGTGTGATAAATGAGCTG	CAGGAAACAGCTATGACTGTGTCCAGATTGCCCCTAT	523
1530	BECN1	A4	CNS2	TGTAAAACGACGGCCAGTTGCTTCCTGCTCAATTACCC	CAGGAAACAGCTATGACAATCACCAAGAGATGGGCTCT	609
1531	BECN1	A5	CNS3	TGTAAAACGACGGCCAGTAACCTCCCCCTAAGGAAAAA	CAGGAAACAGCTATGACAGGGGGTTTTCTTGGCATAG	733
a for genes BECN1, FRAP1, ING1, TRDMT1, DNMT3A, DNMT3B, LMNA, ZMPSTE24, KL, CDKN2A NCBI probes numbers are provided
b CNS = conserved non-coding sequences
c -21 M13 forward primer is included: TGTAAAACGACGGCCAGT
d M13 reverse primer is included: CAGGAAACAGCTATGAC
